# Supplementary material for: Single Cell Sequencing Reveals Mechanisms of Persistent Truncus Arteriosus Formation after PDGFRα and PDGFRβ Double Knockout in Cardiac Neural Crest Cells
Source: MDPI journal article supplement (doi:10.3390/genes13101708), 2022-09-23
Supplement: s1 [file s1]

**Figure S1 Proportion of surviving embryo genotypes at E17.5 and P0**

Genotype identification of these survival embryos showed that all *Pax3<sup>cre/+</sup>;PDGFR $\alpha$ <sup>f/f/+</sup>;PDGFR $\beta$ <sup>f/f/f</sup>* genotype embryos could not survive to birth, other genotypes were inherited according to the Mendelian law.

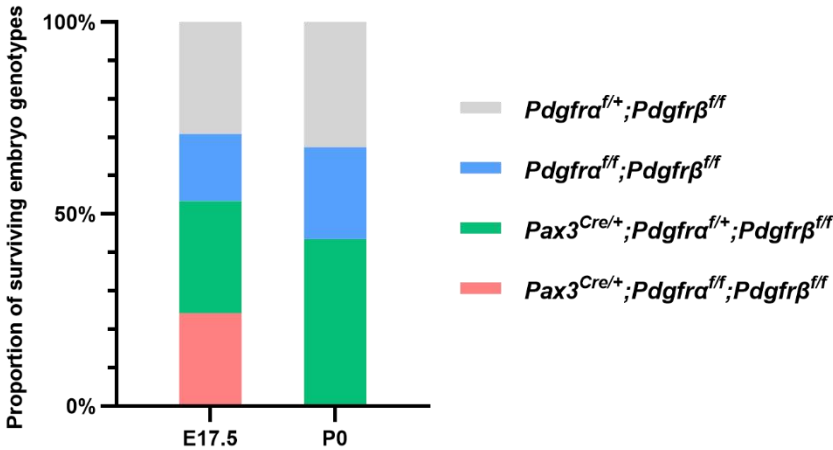

**Figure S2 Phenotype of *PDGFR $\alpha$*  single knockout group at E17.5**

Coronal-section pathological slides with HE staining showed that there were a range of heart phenotypes including normal, PTA, and DORV after *PDGFR $\alpha$*  knockout in CNCCs. PTA, persistent truncus arteriosus; DORV, double outlet of right ventricle. Scale bar, 300  $\mu$ m.

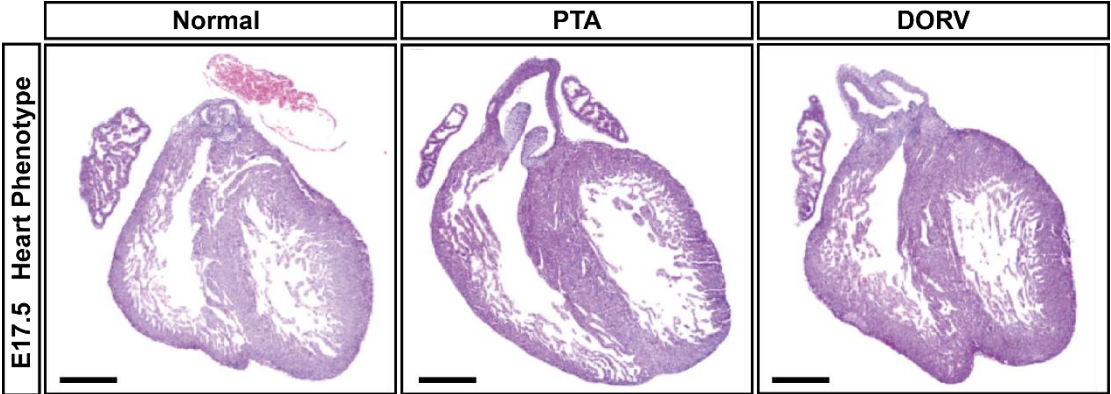

**Figure S3 Phenotype of *PDGFRβ* single knockout group at E17.5**

Coronal-section pathological slides with HE staining showed that there were a range of heart phenotypes including normal and VSD after *PDGFRβ* knockout in CNCCs. VSD, ventricular septal defect. Scale bar, 300 μm.

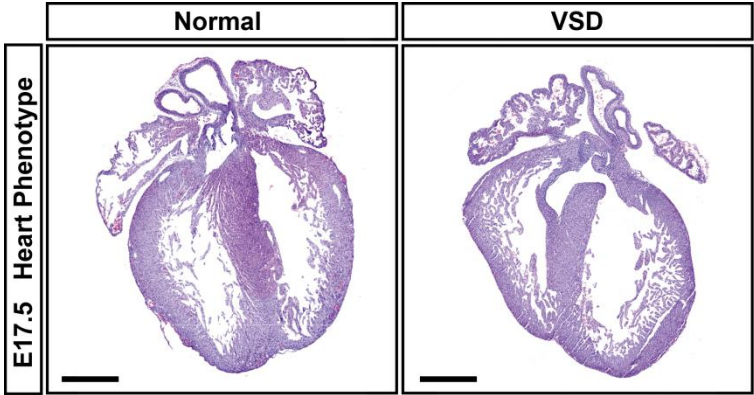

**Figure S4 Phenotypic of *PDGFRα* heterozygous knockdown group at E17.5**

Coronal-section pathological slides with HE staining showed that conotruncal phenotypes of *Pax3<sup>Cre/+</sup>;PDGFRα<sup>fl/+</sup>;PDGFRβ<sup>+/+</sup>* embryos were normal. Scale bar, 300 μm.

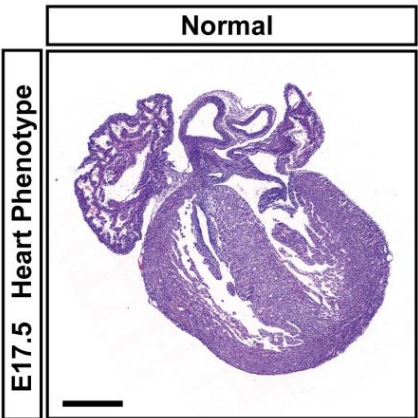

**Figure S5 Immunolabeling for CNCC-RFP, and DAPI staining on transverse sections across the OFT at three distinct distal-proximal levels in E12.5 embryos with the indicated genotype.**

The result showed that there was no significant difference between CON ( $Pax3^{cre/+};PDGFR\alpha^{fl/+};PDGFR\beta^{fl/+}$ ) and DKO ( $Pax3^{cre/+};PDGFR\alpha^{fl/fl};PDGFR\beta^{fl/fl}$ ) group in the number of  $RFP^{+}$  CNCCs per section. CON, control; DKO, double knockout; OFT: outflow tract. Scale bar, 50  $\mu$ m.

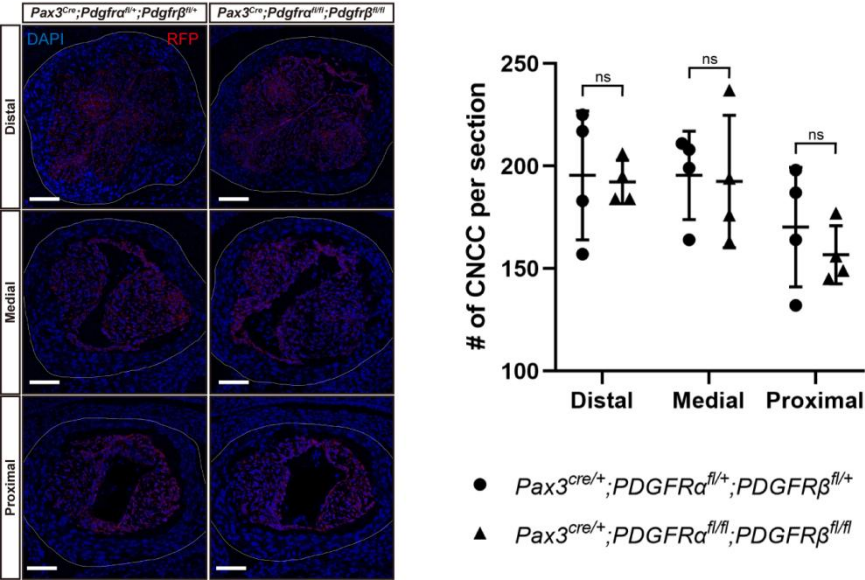

**Figure S6 Transverse sections of E12.5 OFT stained for Ki67 between DKO and control group.**

The result showed that there was no significant difference between CON ( $Pax3^{cre/+};PDGFR\alpha^{fl/+};PDGFR\beta^{fl/+}$ ) and DKO ( $Pax3^{cre/+};PDGFR\alpha^{fl/fl};PDGFR\beta^{fl/fl}$ ) group in the number of  $Ki67^{+}$  CNCCs per section. CON, control; DKO, double knockout; OFT: outflow tract. Scale bar, 50  $\mu$ m.

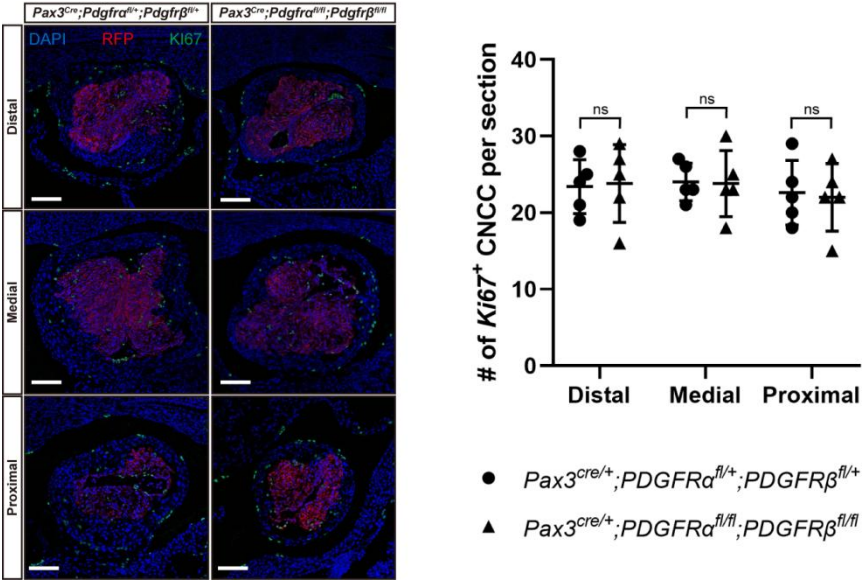

**Figure S7 Transverse sections of E12.5 OFT stained for pH3 between DKO and control group.**

The result showed that there was no significant difference between CON ( $Pax3^{cre/+};PDGFR\alpha^{fl/+};PDGFR\beta^{fl/+}$ ) and DKO ( $Pax3^{cre/+};PDGFR\alpha^{fl/fl};PDGFR\beta^{fl/fl}$ ) group in the number of pH3<sup>+</sup> CNCCs per section (white arrow). CON, control; DKO, double knockout; OFT: outflow tract; pH3: phospho-histone H3. Scale bar, 50  $\mu$ m.

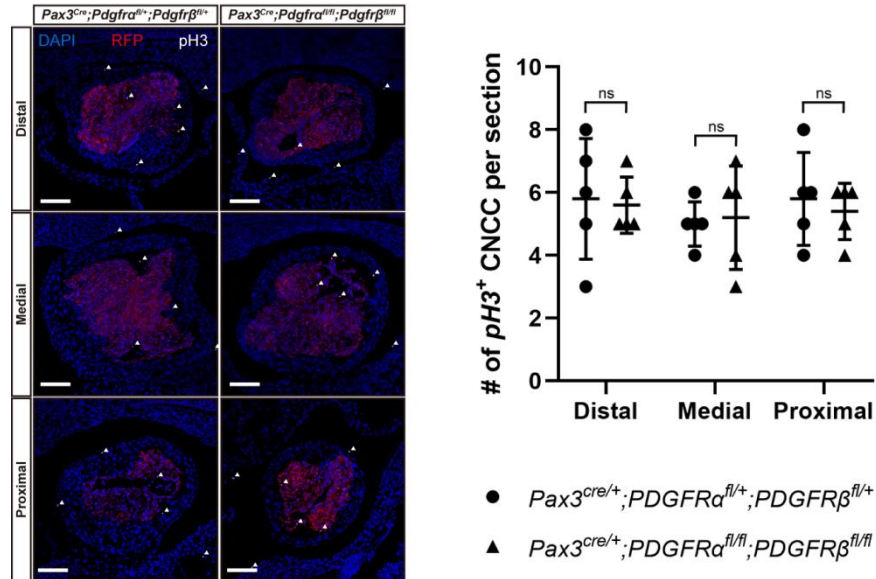

**Figure S8 Transverse sections of E12.5 OFT stained for TUNEL between DKO and control group.**

The result showed that there was no significant difference between CON ( $Pax3^{cre/+};PDGFR\alpha^{fl/+};PDGFR\beta^{fl/+}$ ) and DKO ( $Pax3^{cre/+};PDGFR\alpha^{fl/fl};PDGFR\beta^{fl/fl}$ ) group in the number of TUNEL<sup>+</sup> CNCCs per section (green arrow). CON, control; DKO, double knockout; OFT: outflow tract. TUNEL: terminal deoxynucleotidyl transferase-mediated dUTP-biotin nick end labeling. Scale bar, 50  $\mu$ m.

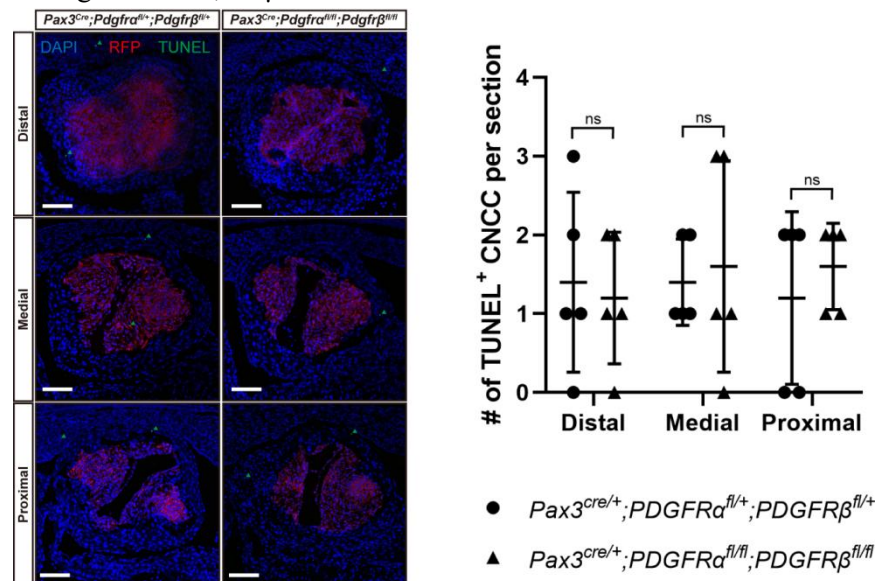

### Figure S9 Quality filtering of single-cell RNA sequencing.

Cells that were of low quality or represented doublets were filtering out by exclusion criteria:

- 1) greater than 25000 and fewer than 600 genes;
- 2) greater than 4000 and fewer than 350 UMI counts;
- 3) greater than 20% mitochondrial gene proportion;
- and 4) greater than or equal to 40% ribosomal gene proportion in Seurat.

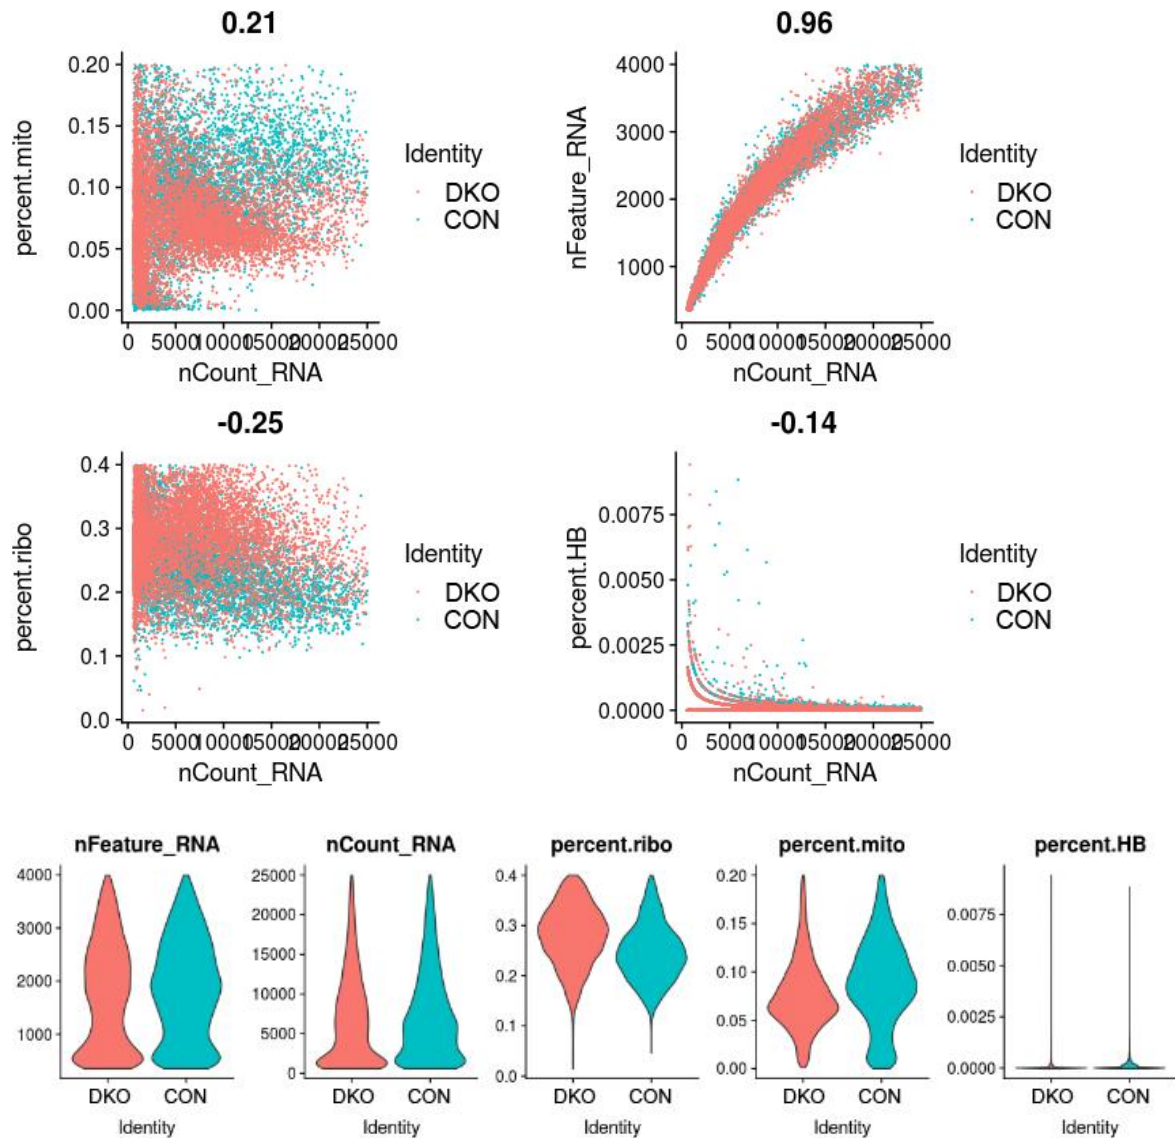

**Figure S10 UMAP plots of all captured OFT cells colored by groups.**

UMAP plots of all captured OFT cells colored by groups showed that cells from CON and DKO groups were mixed evenly, and there was no obvious batch effect. CON, control; DKO, double knockout; UMAP: uniform manifold approximation and projection; OFT: outflow tract.

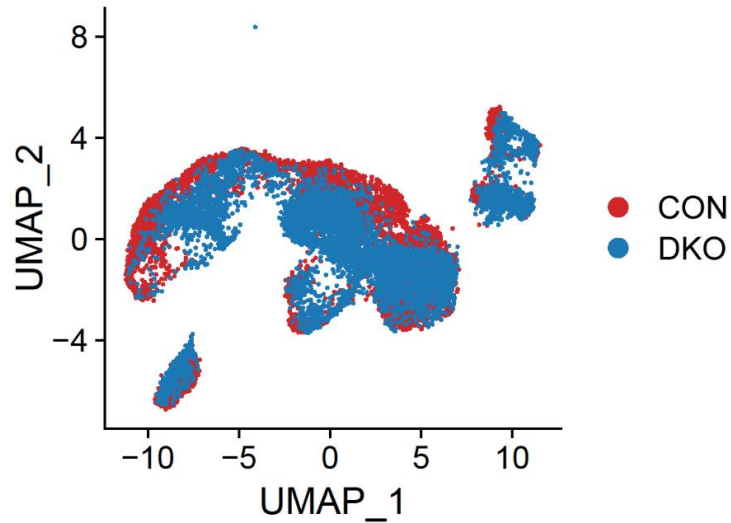

**Figure S11 Cell cluster distribution of DKO and control group on UMAP plots.**

Cell cluster distribution of DKO and control group on UMAP plots showed that there were significant differences in the number of cells from CON and DKO groups. CON, control; DKO, double knockout; MS, mesenchymal cell; CM, cardiomyocyte; VSMC, vascular smooth muscle cell; EP, epicardial cell; EC: endothelial cell; UMAP: uniform manifold approximation and projection.

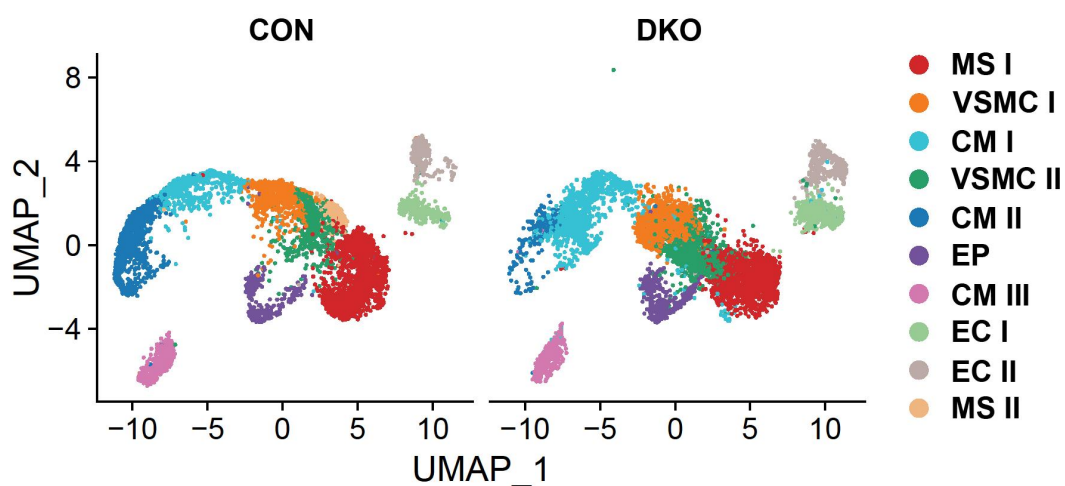

**Figure S12 Direction and rate of cellular state changes inferred by RNA velocity analysis.**

The result revealed that there were two major cell differentiation trends among cell clusters in OFT: CM to VSMC (CM I to VSMC I via CM II) and MS to VSMC (MS I to VSMC II via MS II). CON, control; DKO, double knockout; MS, mesenchymal cell; CM, cardiomyocyte; VSMC, vascular smooth muscle cell; EP, epicardial cell; EC: endothelial cell; OFT, outflow tract.

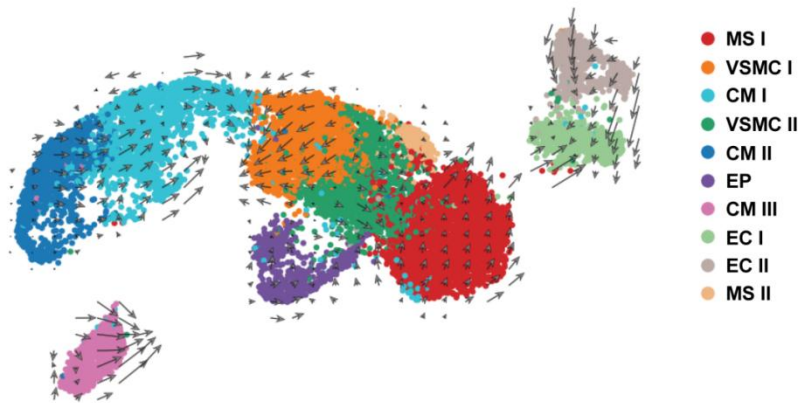

**Figure S13 The function of OFT cell clusters in PDGF signaling pathway indicated by CellChat.**

CellChat analysis results revealed that in the PDGF signaling pathway network, CM I cluster was the main sender, MS I was the receiver and MS II was the mediator.

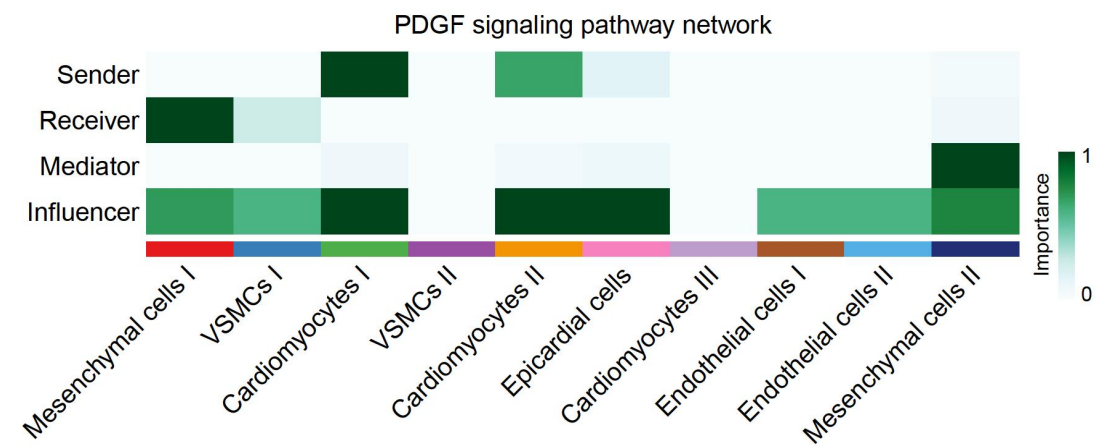

**Figure S14** *In vivo* immunofluorescence verification experiment with Penk and CNCC-RFP.

The result showed that all the *Penk*<sup>+</sup> MS II cells had red fluorescence used for CNCC lineage-tracing in the control group and were absent in the DKO group. Scale bar, 50  $\mu$ m.

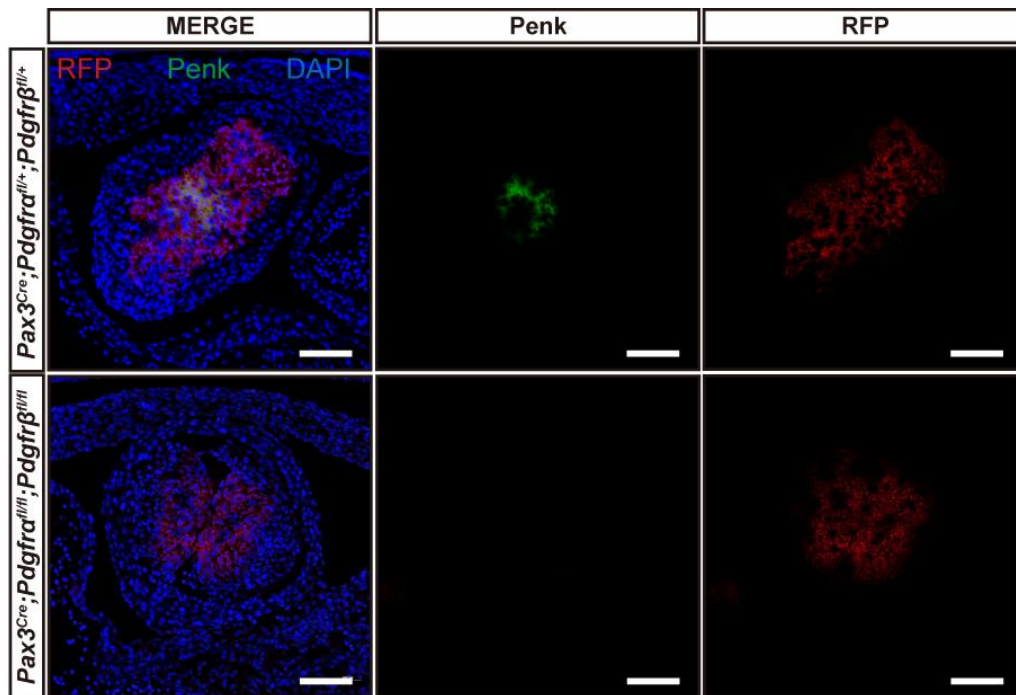

**Figure S15** Co-analysis with single cell data from *Liu et al. 2019*.

The result revealed that *Penk*<sup>+</sup> MS II cells were derived from CNCCs according to reference data, and absent in DKO group. REF: reference data; CON, control; DKO, double knockout.

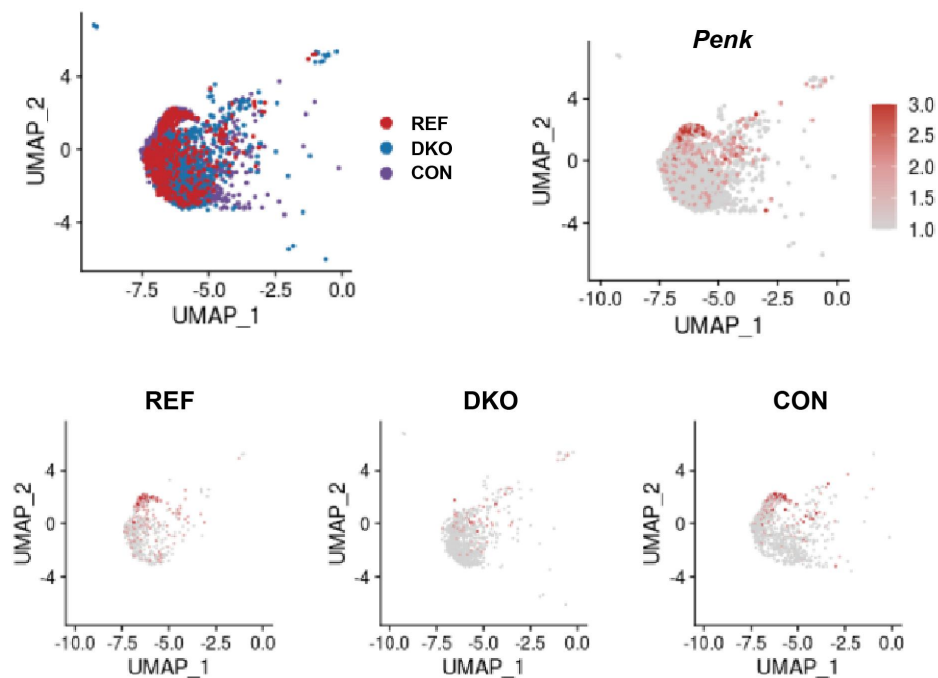

**Figure S16 Expression of marker genes across VSMC clusters as visualized on UMAP plots.**

The result revealed that VSMC I specifically expressed *Col1a2* and *Fbn1* and VSMC II highly expressed *Tmsb10* and *Tmsb4x*. VSMC, vascular smooth muscle cell; UMAP: uniform manifold approximation and projection.

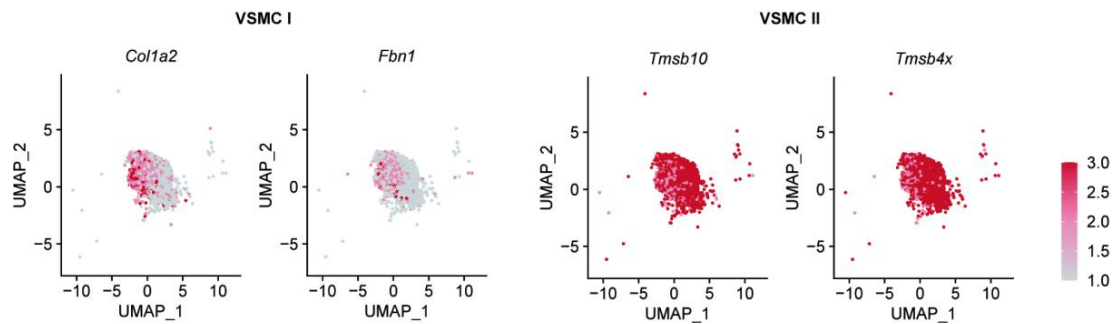

**Figure S17 Comparison of ligand-receptor interactions among MS, CM and VSMC clusters between the DKO and control group by CellChat.**

M, mesenchymal cell; C, cardiomyocyte; V, vascular smooth muscle cell; CON, control; DKO, double knockout.

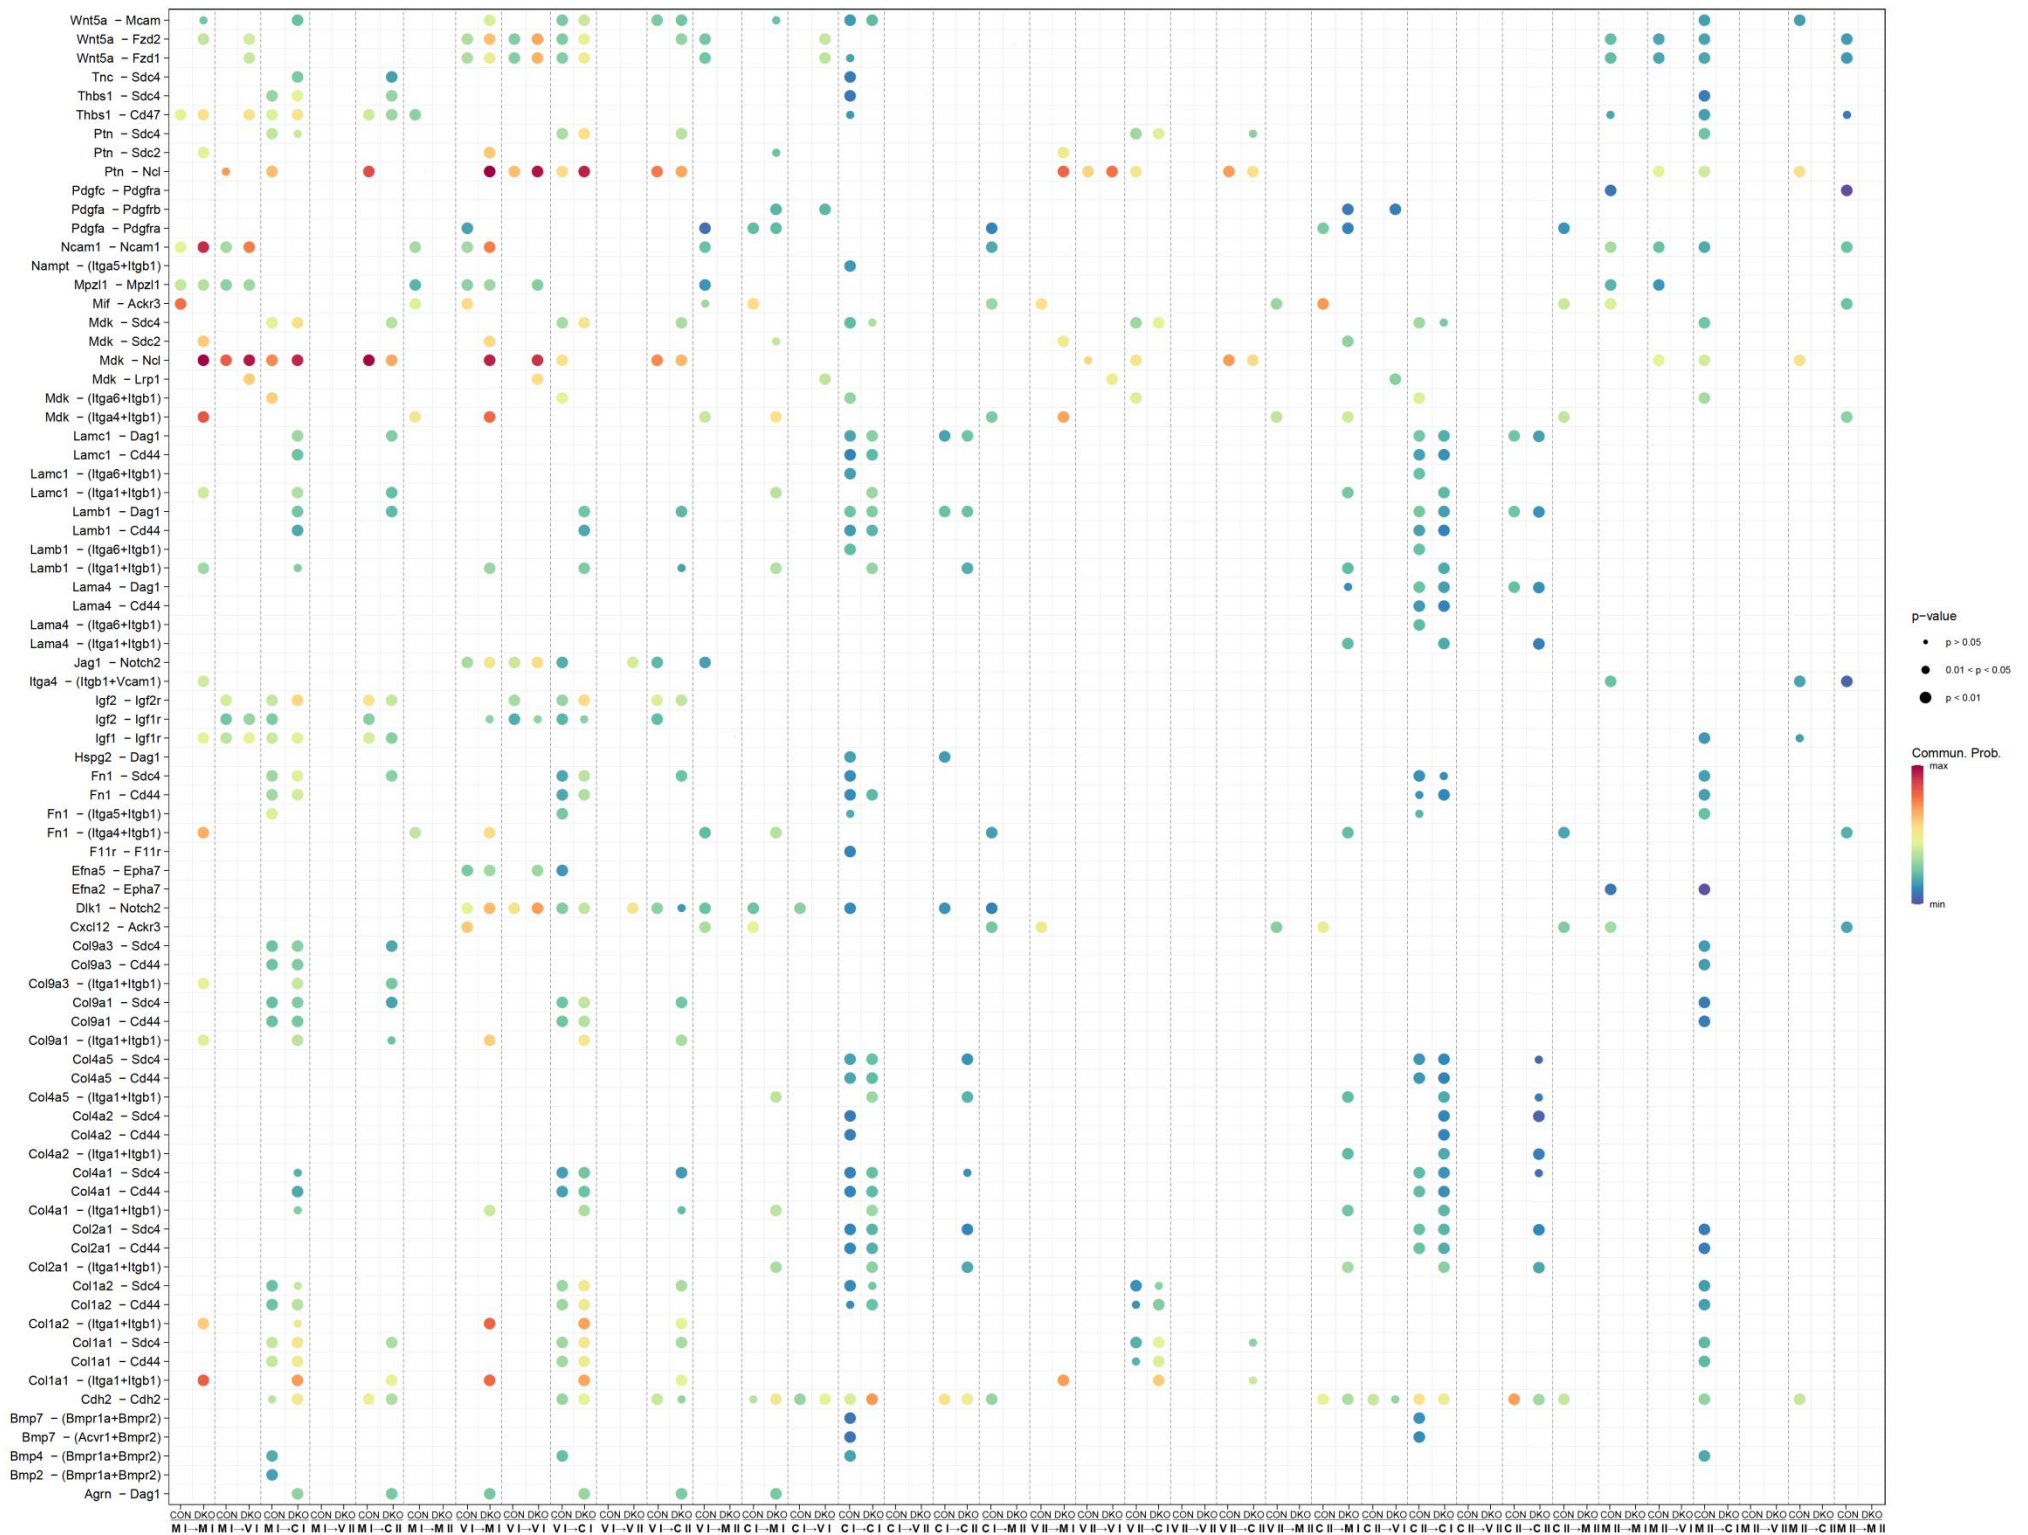

**Table S1 Phenotypic statistics of *PDGFRα* knockout, *PDGFRβ* knockout, and double knockout group at E17.5.**

|                                                                                            | Normal   | Isolated<br>VSD | Isolated<br>DORV | DORV+VSD | PTA+VSD   | Total |
|--------------------------------------------------------------------------------------------|----------|-----------------|------------------|----------|-----------|-------|
| <b><i>Pax3</i><sup>Cre/+</sup>;<i>Pdgfra</i><sup>flf</sup></b>                             | 7 (8%)   | 7 (8%)          | 8 (9%)           | 41 (44%) | 29 (31%)  | 92    |
| <b><i>Pax3</i><sup>Cre/+</sup>;<i>Pdgfrβ</i><sup>flf</sup></b>                             | 35 (95%) | 2 (5%)          | 0                | 0        | 0         | 37    |
| <b><i>Pax3</i><sup>Cre/+</sup>;<i>Pdgfra</i><sup>flf</sup>;<i>Pdgfrβ</i><sup>flf</sup></b> | 0        | 0               | 0                | 0        | 48 (100%) | 48    |

PTA, persistent truncus arteriosus; DORV, double outlet of right ventricle; VSD, ventricular septal defect.
