# Supplementary material for: Single Cell Sequencing Reveals Mechanisms of Persistent Truncus Arteriosus Formation after PDGFRα and PDGFRβ Double Knockout in Cardiac Neural Crest Cells
Source: Genes (Basel). 2022 Sep 23;13(10):1708. doi: 10.3390/genes13101708 (PMC9601305; doi:10.3390/genes13101708)
Supplement: Supplementary file 1 [file genes-13-01708-s001.zip]

Archive with 11 entries (11 files):
- Supplement Figures S1-17 and Table S1.pdf
- Table S10. Differentially expressed genes between VSMC I and II. Related to Figure 6.xlsx
- Table S11. Differentially Expressed Genes between DKO and control group of VSMC I and II cluster. Related to Figure 6.xlsx
- Table S2. Cell polarity orientation statistics.xlsx
- Table S3. Sample indicators after quality control of single-cell RNA sequencing.xlsx
- Table S4. Acquired cell numbers of each cluster from the DKO and control groups in single-cell RNA sequencing.xlsx
- Table S5. Differentially expressed genes between each cluster and all other clusters. Related to Figure 3.xlsx
- Table S6. Differentially expressed genes between CM I, II and III. Related to Figure 4.xlsx
- Table S7. Differentially Expressed Genes between DKO and control group of CM I, II and III cluster. Related to Figure 4.xlsx
- Table S8. Differentially expressed genes between MS I and II. Related to Figure 5.xlsx
- Table S9. Differentially Expressed Genes between DKO and control group of MS I cluster. Related to Figure 5.xlsx
