# Supplementary material for: Single Cell Sequencing Reveals Mechanisms of Persistent Truncus Arteriosus Formation after PDGFRα and PDGFRβ Double Knockout in Cardiac Neural Crest Cells
Source: Genes (Basel). 2022 Sep 23;13(10):1708. doi: 10.3390/genes13101708 (PMC9601305; doi:10.3390/genes13101708)
Supplement: Supplementary file 1 [file genes-13-01708-s001.zip › Table S2. Cell polarity orientation statistics.xlsx]

## Sheet: Upper left cushion(Control)
Cell polarity orientation statistics of upper left cushion (control group)
Cell polarity orientation	0°(Up)	30°	60°	90°(Left)	120°	150°	180°(Down)	210°	240°	270°	300°	330°(Right)	Total
Cell numbers(1#)	11	19	30	26	40	90	52	41	30	19	4	12	374
2#	17	14	34	31	44	64	40	43	23	15	7	6	338
3#	29	24	32	49	94	49	20	28	21	21	24	15	406
4#	25	28	15	32	75	54	31	44	29	7	11	6	357
Proportion(1#)	2.94118	5.08021	8.02139	6.95187	10.6952	24.0642	13.9037	10.9626	8.02139	5.08021	1.06952	3.20856	100
2#	5.02959	4.14201	10.0592	9.1716	13.0178	18.9349	11.8343	12.7219	6.80473	4.43787	2.07101	1.77515	100
3#	7.14286	5.91133	7.88177	12.069	23.1527	12.069	4.92611	6.89655	5.17241	5.17241	5.91133	3.69458	100
4#	7.0028	7.84314	4.20168	8.96359	21.0084	15.1261	8.68347	12.3249	8.12325	1.96078	3.08123	1.68067	100

## Sheet: Upper left cushion(DKO)
Cell polarity orientation statistics of upper left cushion (DKO group)
Cell polarity orientation	0°(Up)	30°	60°	90°(Left)	120°	150°	180°(Down)	210°	240°	270°	300°	330°(Right)	Total
Cell numbers(1#)	12	20	43	28	37	66	51	39	27	39	15	14	391
2#	16	25	31	38	27	42	35	41	35	24	28	7	349
3#	23	22	24	37	35	36	42	22	20	25	15	21	322
4#	14	31	33	29	52	34	38	32	39	27	21	7	357
Proportion(1#)	3.06905	5.11509	10.9974	7.16113	9.46292	16.8798	13.0435	9.97442	6.90537	9.97442	3.83632	3.58056	100
2#	4.58453	7.16332	8.88252	10.8883	7.73639	12.0344	10.0287	11.7479	10.0287	6.87679	8.02292	2.00573	100
3#	7.14286	6.8323	7.45342	11.4907	10.8696	11.1801	13.0435	6.8323	6.21118	7.76398	4.65839	6.52174	100
4#	3.92157	8.68347	9.2437	8.12325	14.5658	9.52381	10.6443	8.96359	10.9244	7.56303	5.88235	1.96078	100

## Sheet: Down right cushion(Control)
Cell polarity orientation statistics of down right cushion (control group)
Cell polarity orientation	0°(Up)	30°	60°	90°(Left)	120°	150°	180°(Down)	210°	240°	270°	300°	330°(Right)	Total
Cell numbers(1#)	50	39	29	32	5	9	6	14	25	27	36	86	358
2#	61	54	35	19	17	21	19	20	12	31	29	65	383
3#	37	30	24	12	9	9	9	16	27	24	67	34	298
4#	50	34	33	10	15	6	23	16	31	44	69	54	385
Proportion(1#)	13.9665	10.8939	8.10056	8.93855	1.39665	2.51397	1.67598	3.91061	6.98324	7.5419	10.0559	24.0223	100
2#	15.9269	14.0992	9.13838	4.96084	4.43864	5.48303	4.96084	5.22193	3.13316	8.09399	7.5718	16.9713	100
3#	12.4161	10.0671	8.05369	4.02685	3.02013	3.02013	3.02013	5.36913	9.0604	8.05369	22.4832	11.4094	100
4#	12.987	8.83117	8.57143	2.5974	3.8961	1.55844	5.97403	4.15584	8.05195	11.4286	17.9221	14.026	100

## Sheet: Down right cushion(DKO)
Cell polarity orientation statistics of down right cushion (DKO group)
Cell polarity orientation	0°(Up)	30°	60°	90°(Left)	120°	150°	180°(Down)	210°	240°	270°	300°	330°(Right)	Total
Cell numbers(1#)	31	25	26	23	24	6	12	25	31	23	32	51	309
2#	45	33	35	39	26	15	18	22	27	28	52	31	371
3#	29	31	27	32	18	29	25	22	23	45	34	44	359
4#	33	35	39	17	16	8	25	30	26	27	41	32	329
Proportion(1#)	10.0324	8.09061	8.41424	7.44337	7.76699	1.94175	3.8835	8.09061	10.0324	7.44337	10.356	16.5049	100
2#	12.1294	8.89488	9.43396	10.5121	7.00809	4.04313	4.85175	5.92992	7.27763	7.54717	14.0162	8.3558	100
3#	8.07799	8.6351	7.52089	8.91365	5.01393	8.07799	6.96379	6.12813	6.40669	12.5348	9.47075	12.2563	100
4#	10.0304	10.6383	11.8541	5.16717	4.86322	2.43161	7.59878	9.11854	7.90274	8.20669	12.462	9.72644	100
