# Supplementary material for: Single Cell Sequencing Reveals Mechanisms of Persistent Truncus Arteriosus Formation after PDGFRα and PDGFRβ Double Knockout in Cardiac Neural Crest Cells
Source: Genes (Basel). 2022 Sep 23;13(10):1708. doi: 10.3390/genes13101708 (PMC9601305; doi:10.3390/genes13101708)
Supplement: Supplementary file 1 [file genes-13-01708-s001.zip › Table S3. Sample indicators after quality control of single-cell RNA sequencing.xlsx]

## Sheet: Sheet1
Table S9. Sample indicators after quality control of single-cell RNA sequencing.
Sample Resource	Estimated Number of Cells	Mean Reads per Cell	Median Genes per Cell	Number of Reads	Valid Barcodes	Sequencing Saturation	Q30 Bases in Barcode	Q30 Bases in RNA Read	Q30 Bases in UMI	Reads Mapped to Genome	Reads Mapped Confidently to Genome	Reads Mapped Confidently to Intergenic Regions	Reads Mapped Confidently to Intronic Regions	Reads Mapped Confidently to Exonic Regions	Reads Mapped Confidently to Transcriptome	Reads Mapped Antisense to Gene	Fraction Reads in Cells	Total Genes Detected	Median UMI Counts per Cell
CON	7511	40003	1774	300463674	0.985	0.698	0.962	0.918	0.959	0.962	0.928	0.03	0.066	0.832	0.793	0.016	0.928	19175	6349
DKO	8533	80498	1675	686890496	0.976	0.843	0.961	0.915	0.957	0.957	0.92	0.033	0.079	0.809	0.765	0.022	0.898	19601	5639
