# Supplementary material for: Single Cell Sequencing Reveals Mechanisms of Persistent Truncus Arteriosus Formation after PDGFRα and PDGFRβ Double Knockout in Cardiac Neural Crest Cells
Source: Genes (Basel). 2022 Sep 23;13(10):1708. doi: 10.3390/genes13101708 (PMC9601305; doi:10.3390/genes13101708)
Supplement: Supplementary file 1 [file genes-13-01708-s001.zip › Table S4. Acquired cell numbers of each cluster from the DKO and control groups in single-cell RNA sequencing.xlsx]

## Sheet: Sheet1
Table S10. Acquired cell numbers of each cluster from the DKO and control groups in single-cell RNA sequencing.
Sample Resource	MS I	VSMC I	CM I	VSMC II	CM II	EP	CM III	EC I	EC II	MS II
CON	1565	692	475	494	1027	349	459	271	302	250
DKO	1368	1197	1225	926	255	451	309	477	385	2
