# Supplementary material for: Single Cell Sequencing Reveals Mechanisms of Persistent Truncus Arteriosus Formation after PDGFRα and PDGFRβ Double Knockout in Cardiac Neural Crest Cells
Source: Genes (Basel). 2022 Sep 23;13(10):1708. doi: 10.3390/genes13101708 (PMC9601305; doi:10.3390/genes13101708)
Supplement: Supplementary file 1 [file genes-13-01708-s001.zip › Table S5. Differentially expressed genes between each cluster and all other clusters. Related to Figure 3.xlsx]

## Sheet: c0
Table S2. Differentially expressed genes between each cluster and all other clusters. Related to Figure 3.
gene	p_val	avg_logFC	pct.1	pct.2	p_val_adj
Dbi	2.17e-76	0.518081	0.991	0.961	4.47e-72
Ramp2	3.68e-49	0.463381	0.754	0.509	7.58e-45
AC167229.1	5.25e-26	0.443335	0.263	0.114	1.08e-21
Rpl13a	1.76e-83	0.428653	0.881	0.638	3.61e-79
Gm11808	1.8e-87	0.428169	0.903	0.687	3.71e-83
Nme2	3.87e-76	0.422342	0.878	0.662	7.95e-72
Igf2r	9.08e-50	0.404326	0.824	0.562	1.87e-45
F2r	6.1e-41	0.391836	0.797	0.572	1.26e-36
Nsa2	3.42e-66	0.386381	0.876	0.652	7.04e-62
Gm14226	1.5e-26	0.385335	0.259	0.107	3.08e-22
Hapln1	6.44e-34	0.371249	0.74	0.537	1.33e-29
Rpl10	2.45e-128	0.363729	0.99	0.959	5.04e-124
Rack1	1.21e-109	0.362148	0.973	0.916	2.5e-105
Lmo4	1.87e-41	0.358157	0.834	0.622	3.85e-37
Uba52	1.62e-144	0.35616	0.994	0.982	3.32e-140
Kitl	1.21e-40	0.353215	0.347	0.138	2.49e-36
Myl7	1.46e-18	0.352542	0.317	0.163	3e-14
Ucp2	8.47e-75	0.34991	0.379	0.09	1.74e-70
Ktn1	1.64e-58	0.343974	0.664	0.351	3.37e-54
Aldoa	7.59e-49	0.3379	0.938	0.819	1.56e-44
Eef1a1	2.54e-144	0.335631	0.999	0.989	5.23e-140
Vcan	1.03e-43	0.328281	0.893	0.713	2.12e-39
Eif2s3y	1.33e-111	0.327257	0.281	0	2.73e-107
Prpf4b	1.11e-56	0.32571	0.695	0.376	2.28e-52
Myl3	6.8e-06	0.324685	0.29	0.209	0.139907
Gm42418	2.54e-59	0.323563	0.485	0.177	5.23e-55
Apoe	1.12e-23	0.320723	0.666	0.466	2.31e-19
Ncam1	9.16e-41	0.318288	0.761	0.502	1.89e-36
Itgb1	2.42e-43	0.312863	0.85	0.661	4.98e-39
Npm1	2.07e-64	0.305474	0.972	0.89	4.27e-60
Loxl2	1.54e-32	0.305441	0.727	0.511	3.16e-28
Bnip3	2.25e-36	0.302793	0.547	0.289	4.63e-32
Pgk1	1.18e-41	0.299541	0.889	0.698	2.44e-37
Igfbp5	1.61e-31	0.299321	0.317	0.131	3.31e-27
Hsp90b1	2.94e-37	0.299032	0.935	0.839	6.05e-33
Egln3	1.21e-58	0.296263	0.262	0.049	2.49e-54
Car3	0.00148781	0.295748	0.401	0.357	1
Itm2b	1.27e-44	0.294969	0.951	0.853	2.62e-40
P4ha1	7.22e-43	0.292799	0.597	0.322	1.49e-38
Grcc10	3.82e-50	0.290896	0.741	0.461	7.86e-46
Hes1	2.69e-29	0.289782	0.85	0.68	5.53e-25
Rpl5	4.1e-84	0.289699	0.98	0.948	8.43e-80
Serbp1	7.28e-41	0.289609	0.918	0.766	1.5e-36
Snhg6	1.36e-38	0.287018	0.835	0.633	2.8e-34
Rpl23a	2.6e-118	0.286472	0.995	0.993	5.35e-114
Prrc2c	1e-34	0.280692	0.541	0.293	2.06e-30
Pttg1	6.44e-20	0.276748	0.504	0.34	1.33e-15
Cdkn1a	3.22e-19	0.274999	0.144	0.048	6.62e-15
Rpl3	3.73e-73	0.272094	0.983	0.936	7.67e-69
Cox7a2l	9.14e-38	0.271366	0.829	0.608	1.88e-33
Hsp90ab1	8.35e-86	0.271182	0.995	0.969	1.72e-81
Hnrnpc	9.2e-34	0.270534	0.791	0.563	1.89e-29
Ctsl	8.46e-34	0.268929	0.911	0.78	1.74e-29
Pabpc1	5.35e-39	0.268014	0.865	0.683	1.1e-34
Tpr	2.38e-40	0.265897	0.536	0.272	4.9e-36
Ldha	1.48e-41	0.260007	0.956	0.851	3.04e-37
Ptprb	3.26e-45	0.259909	0.314	0.098	6.71e-41
Eef1b2	5.59e-65	0.258726	0.988	0.938	1.15e-60
Eif5b	6.38e-38	0.258371	0.719	0.461	1.31e-33
Actc1	9.47e-10	0.255795	0.618	0.46	1.95e-05
Pdia3	1.59e-27	0.250924	0.858	0.682	3.27e-23
Atp5h	1.35e-37	-0.25198	0.95	0.948	2.78e-33
Atpif1	8.97e-30	-0.254127	0.965	0.973	1.85e-25
Cnn2	6.56e-05	-0.254147	0.588	0.56	1
Ndufb7	3.56e-11	-0.254395	0.783	0.751	7.33e-07
Ddah2	5.8e-11	-0.257912	0.672	0.659	1.19e-06
Atp5j2	2.49e-25	-0.259633	0.945	0.938	5.12e-21
Srsf2	7.62e-12	-0.26101	0.656	0.647	1.57e-07
Shisa2	6.68e-05	-0.262533	0.291	0.321	1
D8Ertd738e	2.54e-19	-0.263669	0.846	0.837	5.23e-15
Ndufa5	1.23e-20	-0.265435	0.834	0.817	2.54e-16
mt-Nd4	8.47e-70	-0.267256	0.994	0.993	1.74e-65
Spint2	8.46e-10	-0.274353	0.593	0.615	1.74e-05
Uqcr10	8.52e-23	-0.274768	0.887	0.885	1.75e-18
mt-Nd4l	4.05e-12	-0.275838	0.884	0.86	8.34e-08
Elob	1.01e-50	-0.278173	0.981	0.985	2.07e-46
Atox1	1.76e-25	-0.279653	0.866	0.866	3.62e-21
Rex1bd	1.88e-08	-0.291136	0.555	0.56	0.000387476
Crabp1	4.86e-06	-0.292639	0.206	0.26	0.099949
H19	0.0635451	-0.293524	0.924	0.922	1
Emilin1	4.79e-06	-0.299891	0.424	0.435	0.0984897
Cirbp	1.33e-12	-0.303362	0.525	0.551	2.73e-08
Uqcrq	4.2e-35	-0.305057	0.919	0.925	8.65e-31
Ubc	8.27e-07	-0.308162	0.415	0.44	0.0170138
Ppp1r14b	7.25e-26	-0.309371	0.794	0.797	1.49e-21
Gm26532	3.57e-05	-0.310532	0.345	0.368	0.733696
Uqcc2	7.2e-19	-0.314066	0.84	0.851	1.48e-14
Tgfbi	3.22e-10	-0.320192	0.698	0.684	6.62e-06
Acta2	0.00655949	-0.320816	0.531	0.544	1
Plk2	2.78e-11	-0.330691	0.412	0.471	5.72e-07
H2afj	1.02e-19	-0.333937	0.746	0.766	2.1e-15
Myl9	0.000243978	-0.334236	0.485	0.488	1
mt-Atp6	8.34e-130	-0.355613	0.999	0.997	1.72e-125
Cthrc1	1.44e-19	-0.373475	0.911	0.87	2.96e-15
Mfap4	7.16e-15	-0.373931	0.493	0.553	1.47e-10
Hbb-y	2.64e-34	-0.397152	0.249	0.431	5.43e-30
Tnni1	1.83e-14	-0.418804	0.408	0.484	3.77e-10
Tcf21	3.85e-22	-0.465699	0.333	0.463	7.92e-18
Fos	1.94e-16	-0.479529	0.343	0.426	3.99e-12
Gm26917	0.000780178	-0.502102	0.078	0.109	1
Gm10076	9.44e-108	-0.506337	0.891	0.915	1.94e-103
mt-Cytb	3.53e-156	-0.519361	0.998	0.998	7.27e-152
Tsix	6.32e-112	-0.649037	0.001	0.311	1.3e-107
Sfrp2	3.75e-31	-0.671167	0.363	0.528	7.72e-27
Ptn	1.13e-59	-0.717189	0.594	0.756	2.32e-55
Xist	0	-1.92665	0.001	0.826	0

## Sheet: c1
gene	p_val	avg_logFC	pct.1	pct.2	p_val_adj
Aldoa	7.06277e-118	0.866203	0.965	0.795	1.45331e-113
Bnip3	6.27418e-70	0.820553	0.585	0.175	1.29104e-65
Malat1	4.33027e-116	0.809395	0.999	0.994	8.91039e-112
Pgk1	1.495e-64	0.658302	0.88	0.648	3.07626e-60
Gm11808	3.83769e-85	0.643787	0.893	0.686	7.89681e-81
Uba52	3.77466e-168	0.615486	0.987	0.98	7.76711e-164
Ldha	4.2529e-84	0.608941	0.972	0.854	8.7512e-80
Nsa2	3.57851e-69	0.6	0.879	0.686	7.36349e-65
Snhg6	1.9969e-54	0.579099	0.886	0.729	4.10901e-50
Hk2	1.27131e-30	0.560664	0.509	0.268	2.61597e-26
Rpl13a	4.8183e-62	0.558727	0.865	0.683	9.91462e-58
Mif	4.28972e-86	0.555393	0.991	0.963	8.82697e-82
Gm42418	5.27129e-43	0.549292	0.462	0.149	1.08467e-38
Fam162a	2.19211e-38	0.53524	0.845	0.683	4.5107e-34
Eno1	6.53643e-44	0.517491	0.84	0.628	1.345e-39
P4ha1	2.64001e-37	0.498325	0.562	0.271	5.43234e-33
Cox4i2	4.54465e-26	0.464319	0.365	0.145	9.35153e-22
Tpi1	8.14161e-43	0.460893	0.869	0.675	1.6753e-38
Cox7a2l	4.13595e-42	0.457407	0.809	0.609	8.51055e-38
Igfbp5	6.52489e-18	0.45278	0.266	0.1	1.34263e-13
Eef1a1	1.67595e-121	0.439989	0.997	0.996	3.4486e-117
Ndufa4l2	8.30304e-31	0.439011	0.224	0.026	1.70852e-26
Grcc10	1.20389e-31	0.421046	0.674	0.434	2.47724e-27
Mt1	9.77575e-09	0.400459	0.154	0.066	0.000201156
Fxr1	1.47185e-28	0.395755	0.567	0.314	3.02862e-24
Rpl17	8.36981e-81	0.388169	0.991	0.977	1.72226e-76
Rps27	8.10114e-92	0.385433	0.997	0.996	1.66697e-87
Rack1	1.3859e-65	0.38158	0.977	0.966	2.85177e-61
Ktn1	1.56001e-24	0.378803	0.65	0.424	3.21003e-20
Rps26	1.0052e-131	0.373338	1	1	2.0684e-127
Pfkl	2.46949e-25	0.373063	0.466	0.231	5.08147e-21
Rps28	3.63074e-102	0.359639	1	0.999	7.47098e-98
Sox9	4.04919e-07	0.358848	0.428	0.322	0.00833203
Eml4	3.9008e-21	0.356351	0.528	0.308	8.02667e-17
Plod2	4.23127e-16	0.355029	0.621	0.448	8.70669e-12
Itm2a	1.38475e-06	0.352878	0.79	0.726	0.0284941
Wnt5a	1.45235e-15	0.351811	0.661	0.497	2.9885e-11
Ncam1	3.81038e-15	0.347742	0.54	0.374	7.84061e-11
Rpl6	5.63566e-122	0.347314	0.998	1	1.15965e-117
Igf2r	2.30605e-16	0.345341	0.857	0.734	4.74516e-12
Gapdh	1.85901e-43	0.345283	0.996	0.987	3.82529e-39
Apoe	9.91227e-09	0.337252	0.599	0.496	0.000203965
Meg3	8.11817e-21	0.32881	0.803	0.653	1.67048e-16
Rpl37	2.42697e-128	0.325983	1	1	4.99399e-124
Pabpc1	8.48387e-25	0.323938	0.849	0.702	1.74573e-20
Rpl10	3.66317e-59	0.323473	0.996	0.986	7.5377e-55
Vcan	4.50562e-14	0.321311	0.482	0.308	9.27122e-10
Gng11	1.47721e-08	0.320825	0.563	0.438	0.000303966
Zeb2	7.81151e-18	0.320182	0.415	0.218	1.60737e-13
Ndufa6	1.57107e-27	0.318818	0.911	0.842	3.23279e-23
Slc38a2	3.33999e-21	0.317136	0.821	0.706	6.8727e-17
Ddx3y	7.09948e-39	0.317055	0.213	0	1.46086e-34
Fau	5.83031e-90	0.31606	1	1	1.1997e-85
Eif2s3y	3.29146e-39	0.313775	0.214	0	6.77284e-35
Rps7	4.53395e-111	0.311056	1	1	9.3295e-107
Nrep	1.0665e-14	0.310133	0.656	0.496	2.19453e-10
Col1a2	3.15321e-14	0.309905	0.911	0.868	6.48835e-10
Epb41l4aos	1.22617e-15	0.308965	0.488	0.309	2.52308e-11
Rpl23a	8.88177e-82	0.307247	0.997	1	1.8276e-77
Kdm6b	1.60152e-13	0.306737	0.459	0.289	3.29546e-09
Rpl24	1.15147e-80	0.30625	1	0.999	2.36937e-76
Penk	0.000104698	0.305118	0.214	0.142	1
Rpl5	1.8388e-57	0.304276	0.991	0.983	3.78371e-53
Rpl28	6.63212e-84	0.296662	1	1	1.36469e-79
Ttc3	2.3995e-15	0.294671	0.564	0.394	4.93746e-11
Gpi1	6.85209e-13	0.291662	0.529	0.372	1.40995e-08
Higd1a	1.03821e-11	0.291637	0.855	0.814	2.13633e-07
Rpl38	1.33787e-105	0.291163	0.999	1	2.75293e-101
Rpl37a	3.01424e-87	0.289426	0.997	1	6.20241e-83
Rpl36a	1.10012e-75	0.287824	0.996	1	2.26373e-71
Egr1	4.99698e-12	0.286062	0.395	0.242	1.02823e-07
Peg3	6.45622e-13	0.284927	0.88	0.794	1.3285e-08
mt-Nd5	7.2801e-25	0.282884	0.931	0.841	1.49803e-20
Rpl7	5.87569e-58	0.282812	0.997	0.996	1.20904e-53
mt-Co1	1.12744e-44	0.282507	0.999	0.997	2.31993e-40
Hmcn1	2.26803e-13	0.280969	0.518	0.348	4.66692e-09
Nrk	1.55892e-13	0.280599	0.644	0.479	3.2078e-09
Npm1	2.37546e-40	0.278815	0.991	0.984	4.88798e-36
Soat1	8.87538e-14	0.276875	0.383	0.223	1.82629e-09
Ankrd1	1.26899e-05	0.275639	0.185	0.11	0.261121
Rpl35a	2.95305e-75	0.272253	1	1	6.0765e-71
Pgam1	3.70147e-14	0.272001	0.797	0.698	7.61652e-10
Use1	1.81331e-16	0.268279	0.441	0.252	3.73124e-12
Mrpl24	1.68437e-10	0.265386	0.615	0.479	3.46592e-06
Tcf4	2.15363e-13	0.263814	0.488	0.314	4.43152e-09
Cd55	2.183e-08	0.263733	0.597	0.479	0.000449196
Rpl7a	1.92057e-49	0.262834	0.995	0.994	3.95196e-45
Rpl35	3.50238e-62	0.261218	0.997	0.997	7.20686e-58
Vegfa	2.10508e-19	0.259364	0.244	0.079	4.33163e-15
Eif3f	2.6882e-14	0.256611	0.753	0.619	5.5315e-10
Nfib	1.48083e-11	0.255064	0.808	0.696	3.04709e-07
Eif4a2	2.65788e-13	0.254337	0.682	0.521	5.46911e-09
Myl7	2.73949e-05	0.253955	0.277	0.189	0.563706
Igsf3	1.64339e-11	0.253041	0.444	0.287	3.38161e-07
Jag1	3.92491e-06	0.251825	0.454	0.348	0.0807629
mt-Nd6	3.51928e-11	0.250136	0.333	0.195	7.24163e-07
Tmed9	2.97594e-14	-0.250006	0.594	0.713	6.12358e-10
Dctpp1	1.92104e-11	-0.250423	0.333	0.451	3.95292e-07
D8Ertd738e	9.57491e-16	-0.250859	0.762	0.83	1.97023e-11
Phgdh	5.05525e-18	-0.251036	0.116	0.264	1.04022e-13
Arf4	9.67338e-19	-0.251218	0.834	0.897	1.99049e-14
Ndufs5	3.6089e-18	-0.251545	0.778	0.861	7.42603e-14
Tmsb4x	2.05565e-27	-0.253439	0.999	0.999	4.22992e-23
Ywhah	3.1541e-13	-0.253651	0.567	0.663	6.4902e-09
Slc25a5	3.55232e-10	-0.254141	0.514	0.602	7.30961e-06
Gm26532	6.31426e-11	-0.254682	0.255	0.384	1.29929e-06
Actg1	5.5243e-33	-0.255817	0.995	0.999	1.13674e-28
Psmc4	4.70984e-13	-0.256672	0.339	0.467	9.69144e-09
Banf1	2.27038e-13	-0.25722	0.637	0.725	4.67177e-09
Gnb2	4.18168e-16	-0.257261	0.689	0.764	8.60465e-12
Elob	1.02522e-34	-0.257588	0.972	0.994	2.1096e-30
Sae1	1.68323e-12	-0.258213	0.32	0.45	3.46358e-08
Nedd8	6.05664e-25	-0.258438	0.888	0.94	1.24628e-20
Siva1	1.39334e-12	-0.259009	0.758	0.805	2.86708e-08
Eny2	1.7341e-15	-0.25907	0.714	0.794	3.56825e-11
Stub1	3.76945e-14	-0.260064	0.539	0.646	7.7564e-10
Ptma	1.64932e-44	-0.260703	0.998	1	3.39381e-40
Nudcd2	2.14935e-14	-0.260733	0.413	0.547	4.42271e-10
Prdx6	1.00121e-13	-0.260836	0.526	0.63	2.06019e-09
Hnrnpk	2.51081e-23	-0.261117	0.887	0.928	5.1665e-19
Slc35b1	4.45685e-14	-0.261181	0.229	0.374	9.17085e-10
Hnrnpab	2.64986e-20	-0.261843	0.714	0.842	5.45261e-16
Rps27l	1.8751e-25	-0.261965	0.916	0.961	3.85839e-21
Hnrnpd	1.3463e-13	-0.262931	0.638	0.728	2.77028e-09
Dnajc9	6.55797e-17	-0.264074	0.222	0.384	1.34943e-12
Oaz1	5.50495e-37	-0.264221	0.96	0.984	1.13275e-32
S100a10	7.52555e-15	-0.264234	0.655	0.777	1.54853e-10
Ppia	4.24425e-66	-0.264967	0.997	1	8.73339e-62
Ostc	8.64759e-22	-0.26521	0.837	0.897	1.77941e-17
Spcs2	2.68032e-17	-0.265705	0.731	0.801	5.5153e-13
Taldo1	5.62574e-12	-0.265719	0.445	0.562	1.15761e-07
Gtf2h5	2.41101e-19	-0.266102	0.75	0.841	4.96113e-15
Cenpx	1.02936e-13	-0.266906	0.365	0.5	2.11812e-09
Hnrnpa2b1	9.7275e-22	-0.268417	0.838	0.923	2.00163e-17
Selenoh	2.52888e-14	-0.268473	0.738	0.802	5.20368e-10
Ndufa5	7.36238e-19	-0.268543	0.73	0.822	1.51496e-14
Serp1	8.00806e-13	-0.270191	0.452	0.586	1.64782e-08
Dad1	2.41288e-21	-0.271221	0.878	0.927	4.96499e-17
Tubb2a	7.2211e-14	-0.27135	0.392	0.532	1.48589e-09
Psmb5	1.40532e-19	-0.271503	0.786	0.847	2.89172e-15
Gps1	4.38948e-12	-0.271959	0.25	0.374	9.03224e-08
Sec61b	1.05861e-28	-0.272992	0.952	0.981	2.17829e-24
Srsf7	1.04774e-15	-0.273144	0.427	0.572	2.15594e-11
Mcm6	1.26777e-15	-0.274278	0.151	0.292	2.60869e-11
Crip1	1.8342e-12	-0.27492	0.521	0.653	3.77423e-08
Pdgfa	7.08669e-16	-0.27512	0.126	0.265	1.45823e-11
Ddx39b	2.2582e-15	-0.275859	0.646	0.739	4.6467e-11
Rhoa	4.94347e-22	-0.276413	0.855	0.905	1.01722e-17
Snrpb	5.07918e-18	-0.276988	0.638	0.756	1.04514e-13
Fdps	1.1716e-07	-0.27723	0.411	0.504	0.00241081
Nhp2	1.53942e-12	-0.27727	0.283	0.411	3.16767e-08
Lsm2	6.07521e-14	-0.277857	0.509	0.629	1.2501e-09
Krtcap2	1.16822e-24	-0.279173	0.865	0.93	2.40384e-20
Ndufa11	2.9705e-23	-0.279173	0.775	0.875	6.11239e-19
Elavl1	2.27226e-16	-0.281039	0.507	0.635	4.67563e-12
Cox5a	1.26539e-27	-0.281369	0.856	0.924	2.6038e-23
Pdlim7	6.35186e-13	-0.281395	0.364	0.494	1.30702e-08
Atox1	9.03844e-18	-0.282661	0.735	0.838	1.85984e-13
Sumo2	3.92978e-46	-0.282932	0.972	0.986	8.08631e-42
Vcp	3.08215e-15	-0.283077	0.469	0.606	6.34213e-11
5430416N02Rik	1.1294e-13	-0.283762	0.354	0.493	2.32397e-09
Dut	2.60901e-13	-0.289603	0.623	0.712	5.36857e-09
Srsf3	8.89241e-24	-0.291043	0.765	0.875	1.82979e-19
Bola3	2.06845e-20	-0.29206	0.464	0.635	4.25624e-16
Psmb2	1.20808e-23	-0.294169	0.79	0.88	2.48587e-19
Arf5	2.11057e-23	-0.294276	0.83	0.903	4.34291e-19
Prmt1	9.8651e-23	-0.294778	0.728	0.828	2.02994e-18
Hmgb1	1.19108e-30	-0.294914	0.966	0.993	2.45088e-26
Magoh	2.88667e-21	-0.295605	0.761	0.837	5.93989e-17
Tuba1a	2.30192e-14	-0.297536	0.63	0.738	4.73666e-10
Pbdc1	6.40841e-16	-0.301566	0.283	0.427	1.31866e-11
Sf3b5	4.93346e-20	-0.301602	0.756	0.831	1.01516e-15
Srm	6.44199e-17	-0.30459	0.261	0.418	1.32557e-12
Eif5	3.50473e-23	-0.305369	0.67	0.789	7.21168e-19
Uba2	3.3847e-16	-0.307968	0.371	0.52	6.96471e-12
Uqcrb	4.09939e-43	-0.30813	0.952	0.984	8.43531e-39
Calr	4.69283e-18	-0.308141	0.551	0.711	9.65643e-14
Fbln5	4.93877e-12	-0.309049	0.79	0.862	1.01625e-07
Mrpl20	3.55501e-23	-0.3096	0.675	0.807	7.31513e-19
Lsm4	5.07916e-21	-0.312256	0.647	0.759	1.04514e-16
Actr3	1.19398e-18	-0.314495	0.492	0.633	2.45686e-14
Vdac3	2.79249e-23	-0.315415	0.685	0.815	5.7461e-19
mt-Nd3	2.01727e-55	-0.315648	0.981	0.987	4.15094e-51
Calm1	2.20845e-34	-0.315937	0.902	0.973	4.54434e-30
Guk1	2.75948e-16	-0.31705	0.408	0.549	5.67818e-12
S100a11	3.15844e-24	-0.318889	0.877	0.944	6.49912e-20
Dnajb11	1.82929e-17	-0.320039	0.255	0.42	3.76414e-13
Gtf2a2	2.18763e-21	-0.321331	0.63	0.745	4.50149e-17
Abracl	9.10027e-25	-0.323685	0.745	0.85	1.87256e-20
Kdelr2	4.21236e-22	-0.324772	0.735	0.834	8.66777e-18
Atpif1	7.83769e-30	-0.325771	0.917	0.964	1.61276e-25
Rbpms	7.27382e-18	-0.325814	0.608	0.732	1.49673e-13
Tmem14c	3.63474e-21	-0.328328	0.59	0.719	7.4792e-17
Fabp3	0.357039	-0.328881	0.469	0.415	1
Hspa8	5.00859e-31	-0.329487	0.93	0.979	1.03062e-26
Dynll1	2.57186e-39	-0.333898	0.96	0.994	5.29213e-35
Smdt1	7.18293e-31	-0.334008	0.803	0.898	1.47803e-26
Lsm3	2.62563e-18	-0.338435	0.452	0.605	5.40276e-14
Tipin	1.7326e-19	-0.339954	0.375	0.542	3.56517e-15
Myl6	1.70065e-50	-0.340358	0.985	0.999	3.49943e-46
Brix1	8.47858e-22	-0.340874	0.386	0.562	1.74464e-17
U2af1	3.38143e-29	-0.343637	0.761	0.86	6.95797e-25
Eif5a	3.59874e-40	-0.343946	0.899	0.951	7.40513e-36
Maged2	1.2682e-18	-0.344483	0.412	0.572	2.60958e-14
Ppa1	7.57262e-19	-0.348301	0.299	0.468	1.55822e-14
Fkbp1a	1.21188e-30	-0.350285	0.82	0.907	2.49369e-26
Cdk1	2.29315e-14	-0.350866	0.3	0.461	4.71862e-10
Cnn1	2.99505e-08	-0.351114	0.193	0.299	0.000616291
Sf3b6	2.37103e-34	-0.351799	0.721	0.835	4.87887e-30
Psmb3	4.25737e-31	-0.355636	0.762	0.88	8.76039e-27
Tagln	1.91173e-22	-0.356649	0.754	0.923	3.93377e-18
Hmgb2	2.54433e-16	-0.359286	0.729	0.822	5.23546e-12
Tyms	1.93191e-16	-0.364196	0.288	0.437	3.97529e-12
Dtymk	6.39379e-25	-0.364584	0.566	0.729	1.31565e-20
Ppp1r14b	1.98189e-26	-0.36614	0.649	0.788	4.07814e-22
Ifrd1	8.16212e-26	-0.368731	0.264	0.476	1.67952e-21
Klf2	4.64386e-16	-0.368914	0.171	0.33	9.55568e-12
Actb	2.72427e-25	-0.370465	0.995	0.999	5.60573e-21
Tmed2	4.82942e-35	-0.370972	0.798	0.898	9.93751e-31
Lsm6	1.48924e-33	-0.373314	0.663	0.84	3.06441e-29
Snrpd1	1.95552e-40	-0.373539	0.889	0.951	4.02387e-36
Ndufa4	4.6547e-68	-0.375377	0.975	0.991	9.57797e-64
Cirbp	4.45843e-26	-0.375705	0.449	0.649	9.1741e-22
Lum	0.000197009	-0.378389	0.24	0.301	1
1810037I17Rik	3.9753e-33	-0.392225	0.81	0.903	8.17997e-29
Orc6	1.25147e-26	-0.393842	0.415	0.617	2.57515e-22
Hnrnpf	7.76762e-37	-0.397332	0.734	0.85	1.59834e-32
Dbi	9.49091e-45	-0.401726	0.803	0.913	1.95294e-40
Gmnn	2.07048e-20	-0.407587	0.287	0.468	4.26042e-16
mt-Nd1	3.53438e-95	-0.408933	0.992	0.996	7.2727e-91
Myl9	7.63401e-25	-0.411503	0.577	0.766	1.57085e-20
Tnni1	1.33801e-13	-0.414538	0.418	0.552	2.75323e-09
Atp5g1	3.61544e-54	-0.417665	0.875	0.958	7.4395e-50
Manf	1.18649e-31	-0.419133	0.695	0.84	2.44143e-27
H2afz	5.52922e-33	-0.419316	0.985	0.99	1.13775e-28
Nme1	1.37023e-34	-0.421768	0.685	0.811	2.81953e-30
Rbm3	3.71718e-49	-0.426792	0.797	0.911	7.64883e-45
Uqcrq	1.88524e-50	-0.429747	0.813	0.924	3.87925e-46
Tnnc1	2.01115e-06	-0.43342	0.221	0.302	0.0413835
Ran	9.50188e-56	-0.436582	0.904	0.966	1.9552e-51
Pdlim3	6.16114e-19	-0.451889	0.633	0.765	1.26778e-14
Hspa5	9.55103e-31	-0.455751	0.662	0.794	1.96531e-26
mt-Atp6	1.85286e-136	-0.462428	0.994	0.999	3.81263e-132
Gm10076	7.5554e-72	-0.469831	0.879	0.941	1.55468e-67
Srsf2	4.92575e-40	-0.474937	0.485	0.705	1.01357e-35
Pdia6	4.12343e-41	-0.479443	0.687	0.851	8.48477e-37
Id3	6.24246e-36	-0.484355	0.88	0.966	1.28451e-31
Cycs	1.37839e-55	-0.488205	0.799	0.936	2.83631e-51
Alyref	1.12408e-43	-0.48824	0.654	0.818	2.31302e-39
Prdx1	4.26576e-97	-0.542401	0.933	0.987	8.77765e-93
Ranbp1	6.56054e-72	-0.55666	0.781	0.943	1.34996e-67
Rrm2	3.47079e-29	-0.563423	0.149	0.36	7.14185e-25
mt-Cytb	2.85803e-127	-0.565786	0.997	0.997	5.88096e-123
Tsix	2.44917e-118	-0.631967	0.001	0.39	5.03965e-114
Acta2	7.8471e-39	-0.631992	0.608	0.831	1.6147e-34
Pclaf	3.30681e-24	-0.734343	0.298	0.499	6.80442e-20
Xist	0	-1.89136	0.003	0.861	0

## Sheet: c2
gene	p_val	avg_logFC	pct.1	pct.2	p_val_adj
Malat1	8.43679e-71	1.28115	0.927	0.733	1.73604e-66
Igf2r	1.13882e-30	1.21158	0.482	0.214	2.34334e-26
Gm42418	1.3826e-23	1.00548	0.303	0.073	2.84497e-19
Myl7	1.04506e-11	0.852459	0.296	0.143	2.15042e-07
Col1a1	4.5083e-22	0.828341	0.57	0.341	9.27674e-18
Ankrd1	8.22846e-10	0.823997	0.164	0.053	1.69317e-05
mt-Co1	1.67785e-57	0.797787	0.97	0.796	3.45251e-53
Vcan	9.51449e-16	0.793277	0.288	0.11	1.9578e-11
Myh9	9.34798e-11	0.734936	0.23	0.098	1.92353e-06
Igfbp5	1.61455e-12	0.720856	0.142	0.024	3.32227e-08
Actc1	6.01145e-11	0.714235	0.468	0.304	1.23698e-06
Bnip3	2.42294e-14	0.702434	0.256	0.09	4.98567e-10
Meg3	2.14968e-13	0.697468	0.312	0.145	4.42339e-09
Myh7	1.32837e-07	0.692833	0.113	0.033	0.00273339
Myl3	5.25287e-07	0.684645	0.25	0.143	0.0108088
Pam	7.34287e-12	0.682547	0.414	0.257	1.51094e-07
Mt1	2.35166e-09	0.657018	0.134	0.035	4.83901e-05
Myl4	1.83649e-06	0.649994	0.173	0.082	0.0377895
mt-Nd5	6.12274e-18	0.647431	0.544	0.343	1.25988e-13
Stk38l	1.32989e-07	0.646252	0.224	0.118	0.00273651
Sox9	3.24526e-07	0.6452	0.305	0.198	0.00667777
Notch2	4.19073e-08	0.638336	0.274	0.155	0.000862327
mt-Nd2	1.41506e-39	0.61722	0.932	0.765	2.91177e-35
Spry2	4.06278e-10	0.616841	0.306	0.163	8.35998e-06
Thbs1	1.11595e-08	0.606017	0.151	0.051	0.000229628
mt-Nd6	2.83771e-09	0.596165	0.182	0.069	5.83916e-05
Kdm6b	2.30217e-07	0.58529	0.191	0.092	0.00473717
Slc38a2	1.31279e-08	0.574093	0.351	0.229	0.000270133
Gm11808	1.15587e-13	0.572954	0.512	0.355	2.37844e-09
Ldha	1.12672e-25	0.572296	0.751	0.588	2.31845e-21
Prrc2c	1.49329e-07	0.568919	0.252	0.139	0.00307275
Gpc3	5.04157e-10	0.560576	0.57	0.449	1.0374e-05
Nfib	3.63844e-09	0.558911	0.325	0.19	7.48682e-05
Fbn2	2.77089e-07	0.558238	0.209	0.106	0.00570167
Aldoa	8.12655e-20	0.553096	0.704	0.555	1.6722e-15
Peg3	1.33634e-06	0.535301	0.367	0.261	0.0274979
Egr1	8.99927e-11	0.531608	0.153	0.041	1.85178e-06
Ktn1	1.26857e-08	0.529632	0.257	0.135	0.000261033
Nfia	5.69821e-09	0.527789	0.405	0.267	0.000117252
Hk2	4.87628e-11	0.526691	0.192	0.065	1.00339e-06
Myadm	7.68694e-08	0.51083	0.325	0.202	0.00158174
Col1a2	8.88855e-05	0.507661	0.356	0.28	1
Pgk1	1.28916e-10	0.506291	0.528	0.402	2.65271e-06
Alkbh5	1.01759e-07	0.50244	0.239	0.124	0.0020939
Apoe	5.37405e-07	0.500937	0.359	0.251	0.0110582
Top2a	5.53386e-07	0.500612	0.162	0.071	0.011387
Ncam1	8.21004e-08	0.49811	0.246	0.131	0.00168938
Fn1	0.000405558	0.478963	0.23	0.161	1
Fam162a	7.56164e-10	0.471287	0.534	0.42	1.55596e-05
Col3a1	5.57196e-08	0.470364	0.491	0.369	0.00114654
Loxl2	4.66766e-05	0.453059	0.23	0.149	0.960464
Gsk3b	4.03665e-05	0.452968	0.275	0.188	0.830621
Eef1a1	1.06826e-42	0.451993	0.968	0.902	2.19815e-38
Ctsl	1.89471e-07	0.44516	0.52	0.424	0.00389874
Eno1	3.73427e-08	0.441706	0.483	0.361	0.000768401
Snhg6	0.00010151	0.438903	0.417	0.353	1
Fbln2	2.21035e-05	0.435783	0.326	0.237	0.454823
Kdm5b	1.5299e-06	0.43448	0.131	0.051	0.0314808
Rnd3	1.70549e-05	0.430529	0.148	0.071	0.350939
Paip1	0.000555573	0.427592	0.261	0.192	1
Eif5b	0.000307177	0.426624	0.252	0.18	1
Sptbn1	5.8762e-07	0.423727	0.176	0.082	0.0120915
mt-Nd3	2.49912e-18	0.421688	0.795	0.588	5.14243e-14
mt-Co3	1.20154e-26	0.415953	0.995	0.955	2.47242e-22
Plagl1	0.00149139	0.412712	0.138	0.084	1
Ncl	4.5967e-05	0.411793	0.307	0.218	0.945863
Rpl13a	4.54845e-07	0.409072	0.455	0.339	0.00935935
Uba52	7.91222e-25	0.408683	0.903	0.824	1.6281e-20
Lmo4	3.46921e-05	0.403131	0.323	0.233	0.71386
Ramp2	1.6828e-06	0.403117	0.223	0.122	0.0346271
Nsa2	5.76111e-07	0.401778	0.456	0.353	0.0118546
Epha7	1.46357e-05	0.400837	0.126	0.055	0.301159
Rrbp1	1.51221e-05	0.400646	0.224	0.135	0.311168
Lrrc58	1.53394e-08	0.397667	0.133	0.039	0.000315639
mt-Co2	3.83721e-26	0.39588	0.989	0.937	7.89583e-22
Slc39a1	0.000747858	0.394167	0.27	0.2	1
Vcl	8.44784e-08	0.39409	0.132	0.043	0.00173831
Supt16	0.000100006	0.392589	0.183	0.108	1
Nrk	0.000248073	0.390222	0.206	0.137	1
Igsf3	0.000374473	0.387779	0.136	0.076	1
mt-Nd4	1.79291e-21	0.387052	0.929	0.796	3.68928e-17
Pabpc1	1.67847e-05	0.386208	0.413	0.329	0.345379
Ttc3	0.000143053	0.386086	0.219	0.141	1
Plod2	0.000659459	0.38576	0.247	0.178	1
Hes1	0.000100956	0.384238	0.364	0.284	1
Myh10	0.00106028	0.381869	0.213	0.147	1
Prpf4b	0.000607628	0.37949	0.228	0.157	1
Mef2a	5.52221e-06	0.378886	0.156	0.073	0.113631
Itgb1	0.000549468	0.375019	0.378	0.308	1
Btg1	3.26663e-05	0.3736	0.388	0.298	0.672174
Grb10	3.16026e-05	0.372065	0.298	0.206	0.650287
Klf6	1.66542e-05	0.371381	0.237	0.145	0.342694
mt-Nd4l	3.65572e-07	0.371163	0.462	0.339	0.00752237
Adam10	0.000293857	0.368191	0.208	0.135	1
Nexn	0.00280484	0.364581	0.141	0.09	1
Nrip1	1.41596e-05	0.361747	0.136	0.061	0.291363
Col5a1	0.000114488	0.360751	0.146	0.078	1
Mif	4.13534e-19	0.358069	0.906	0.833	8.50928e-15
Cyr61	0.000891623	0.358004	0.161	0.1	1
Irs2	3.59703e-05	0.357888	0.137	0.065	0.74016
Col18a1	0.000162449	0.35629	0.204	0.127	1
Tnnt2	0.033132	0.356134	0.184	0.147	1
Zeb2	0.00050918	0.35309	0.143	0.084	1
Chd4	0.000620382	0.351216	0.165	0.102	1
Marf1	2.28372e-05	0.350901	0.139	0.065	0.469921
Hsp90aa1	0.000111871	0.349746	0.427	0.359	1
Col5a2	0.00128228	0.348107	0.205	0.143	1
Hnrnpl	0.00523683	0.345108	0.301	0.245	1
Atp2b1	0.00173327	0.343269	0.183	0.122	1
Macf1	2.35204e-05	0.34134	0.111	0.045	0.483979
Dpysl2	0.00124634	0.337505	0.154	0.096	1
Sox4	0.00316766	0.335848	0.301	0.239	1
P4ha1	0.000207824	0.334472	0.187	0.112	1
Ppp3ca	0.000374588	0.333627	0.163	0.096	1
Pum1	0.00103921	0.332879	0.159	0.098	1
Ap2a2	0.00077288	0.330702	0.21	0.143	1
Fbn1	0.000794153	0.330697	0.229	0.159	1
Cdh11	0.00288606	0.328815	0.166	0.11	1
Cited2	0.000217079	0.328761	0.181	0.108	1
Hspb1	0.12774	0.328151	0.331	0.314	1
Hist1h2ap	0.00379476	0.326755	0.143	0.092	1
Nisch	0.00120636	0.324182	0.168	0.108	1
Tsc22d2	0.000126719	0.323938	0.106	0.047	1
Eef2	0.00121877	0.323261	0.423	0.367	1
Tcf4	0.0016486	0.32212	0.165	0.106	1
Tnnc1	0.0336341	0.317572	0.168	0.129	1
Ndufa4l2	4.46409e-06	0.316551	0.101	0.033	0.0918575
Son	0.000396769	0.315204	0.287	0.21	1
Srrm2	0.0028665	0.31447	0.352	0.292	1
Cdh2	0.000689902	0.311886	0.148	0.086	1
mt-Nd1	2.85171e-13	0.310072	0.906	0.796	5.86797e-09
Yme1l1	0.00614536	0.309802	0.19	0.135	1
Fabp5	0.00939862	0.307498	0.342	0.29	1
Creb3l2	0.00646169	0.30726	0.152	0.102	1
Ccdc58	0.0320374	0.306638	0.225	0.186	1
Mbnl2	0.00118842	0.306211	0.113	0.061	1
mt-Atp8	0.00056689	0.305611	0.14	0.08	1
Tgfb2	0.0830947	0.305072	0.214	0.182	1
Gyg	0.0450505	0.304263	0.28	0.243	1
Gapdh	1.10625e-13	0.304004	0.92	0.873	2.27633e-09
Ctnnb1	0.00286703	0.301602	0.266	0.202	1
Ywhaz	0.00239556	0.300145	0.347	0.284	1
Wnt5a	0.026474	0.299677	0.188	0.147	1
Iqgap1	0.000336614	0.299175	0.106	0.051	1
Tbx20	0.00144733	0.298944	0.157	0.098	1
Pfkl	8.74282e-05	0.298765	0.194	0.114	1
Tpi1	0.000285141	0.298551	0.466	0.394	1
St13	0.0100949	0.297237	0.368	0.318	1
Wsb1	0.0192875	0.29723	0.143	0.102	1
Skil	0.0273868	0.297211	0.246	0.204	1
Prelid2	2.91378e-05	0.296982	0.113	0.047	0.599569
Rpgrip1	0.000318929	0.296058	0.129	0.067	1
Nedd4	0.000745627	0.295649	0.469	0.41	1
Smarcc1	9.43599e-05	0.294672	0.127	0.061	1
Lamp2	0.00417236	0.294495	0.125	0.078	1
Tpr	0.00405959	0.293596	0.161	0.108	1
Eif3a	0.0167771	0.29342	0.19	0.143	1
Man1a2	0.00911665	0.292885	0.15	0.102	1
Msi2	0.000408327	0.292355	0.127	0.067	1
Chsy1	0.000175738	0.290404	0.115	0.055	1
Mecom	0.043362	0.288669	0.188	0.149	1
Cd47	0.000168018	0.288346	0.138	0.071	1
Zfhx3	0.000221439	0.287919	0.12	0.059	1
Itm2a	0.0295675	0.287542	0.373	0.335	1
Marcks	0.0106681	0.28585	0.407	0.359	1
Fzd1	0.00675538	0.28313	0.177	0.127	1
Flna	0.0143038	0.282102	0.208	0.159	1
Galnt1	8.04467e-05	0.281045	0.114	0.051	1
Cryab	0.478898	0.280901	0.166	0.157	1
Ubap2l	0.00467096	0.280717	0.208	0.149	1
Rock2	7.28106e-05	0.280051	0.118	0.053	1
Ddx17	0.000425668	0.279991	0.133	0.071	1
Nmt2	0.000329452	0.279744	0.107	0.051	1
Wtap	0.0157918	0.279125	0.225	0.176	1
Igf1r	0.0117769	0.277603	0.119	0.078	1
Myl2	0.0593006	0.27617	0.118	0.086	1
Khsrp	0.117074	0.27551	0.138	0.112	1
Midn	0.0216204	0.274619	0.112	0.076	1
Fnbp1l	0.00216463	0.274462	0.11	0.061	1
Ier3	0.0300558	0.274325	0.15	0.11	1
Pkm	0.00219774	0.273083	0.515	0.482	1
Aplp2	0.0121451	0.272223	0.117	0.076	1
Rdx	0.00546072	0.27186	0.331	0.269	1
Igf1	0.00217052	0.26945	0.156	0.098	1
Arid1a	0.000807785	0.268379	0.121	0.065	1
Sorbs2	0.00240519	0.267644	0.107	0.059	1
Ctsb	0.0960157	0.266094	0.21	0.18	1
Jun	0.0967355	0.266084	0.235	0.204	1
Ets1	0.00138466	0.265998	0.101	0.053	1
Birc6	0.0271577	0.265482	0.106	0.071	1
Sox11	0.000203074	0.264646	0.154	0.084	1
Qk	0.0529614	0.264412	0.135	0.102	1
Fxr1	0.0138104	0.264057	0.179	0.131	1
Rest	0.0108226	0.263902	0.132	0.088	1
Zfp36l1	0.0328466	0.263639	0.184	0.143	1
Hnrnpc	0.00540727	0.263566	0.326	0.265	1
Sfrp1	0.0110375	0.263127	0.178	0.129	1
Efnb2	0.0109897	0.262361	0.118	0.076	1
Tmem60	0.022923	0.259389	0.187	0.141	1
Dlc1	7.03748e-06	0.259129	0.101	0.035	0.14481
Eml4	6.66734e-05	0.258738	0.147	0.073	1
Brd1	0.000147705	0.256589	0.131	0.065	1
Adam19	0.00264685	0.256371	0.159	0.102	1
Tmx4	6.86668e-05	0.256125	0.104	0.043	1
Smad7	0.0444983	0.255588	0.128	0.094	1
Eif4g1	9.57116e-05	0.253323	0.108	0.047	1
Cox4i2	0.000138363	0.253257	0.137	0.069	1
Pcbp2	0.0409632	0.253227	0.381	0.345	1
Hsp90b1	0.00151168	0.252841	0.522	0.465	1
Sept10	0.045735	0.25165	0.161	0.124	1
Agrn	9.5843e-06	0.251617	0.124	0.051	0.197216
Hnrnpa1	0.000715905	0.250439	0.724	0.692	1
Ndufa2	9.36928e-06	-0.250175	0.539	0.647	0.192792
Nxf1	0.00136725	-0.25018	0.242	0.314	1
Rnaseh2b	8.34082e-06	-0.250428	0.098	0.18	0.171629
Isyna1	0.000119141	-0.250497	0.087	0.153	1
Snrpc	1.96723e-05	-0.251525	0.305	0.416	0.404798
Ppid	0.00529385	-0.251729	0.161	0.214	1
Anapc13	2.83413e-05	-0.252121	0.329	0.435	0.58318
Calm1	8.37313e-08	-0.252202	0.65	0.751	0.00172294
Mrpl14	0.0193729	-0.252223	0.258	0.306	1
Mrpl27	0.000161695	-0.25307	0.125	0.198	1
Ssbp1	2.68485e-05	-0.25392	0.248	0.351	0.552461
Fkbp2	0.000176997	-0.254443	0.169	0.247	1
Cript	2.1404e-05	-0.254706	0.17	0.259	0.44043
Bcas2	1.01218e-06	-0.255029	0.338	0.467	0.0208276
Ndufc1	3.41246e-07	-0.255292	0.577	0.722	0.00702182
Cdc42	4.84206e-08	-0.255785	0.499	0.641	0.000996351
Btf3	2.33949e-11	-0.256104	0.809	0.9	4.81396e-07
Cops6	4.74896e-05	-0.256177	0.208	0.298	0.977193
Marcksl1	2.53264e-06	-0.256663	0.35	0.476	0.0521142
Ndufab1	3.08059e-06	-0.256975	0.487	0.608	0.0633893
Ube2n	3.13117e-05	-0.257634	0.32	0.422	0.644301
Uqcr10	9.08791e-06	-0.258162	0.464	0.596	0.187002
Ddx39b	6.98886e-05	-0.259026	0.31	0.412	1
Mrpl36	0.000196732	-0.259132	0.175	0.253	1
Ddx39	0.000168645	-0.259669	0.106	0.173	1
Ift20	9.75416e-05	-0.26085	0.183	0.269	1
Psmb2	2.17735e-06	-0.260903	0.435	0.561	0.0448032
Lsm4	8.82003e-06	-0.261081	0.333	0.445	0.18149
Phb2	0.000439556	-0.261234	0.21	0.288	1
Mettl1	0.00326476	-0.261516	0.129	0.184	1
Actg1	9.82918e-14	-0.262093	0.927	0.959	2.02255e-09
Pet100	0.00167759	-0.262175	0.149	0.21	1
Txnl1	2.26568e-05	-0.262467	0.289	0.398	0.466208
Psmc5	0.000340822	-0.262646	0.169	0.243	1
Atp5j	2.2697e-09	-0.263443	0.638	0.771	4.67037e-05
D8Ertd738e	1.66875e-05	-0.26419	0.398	0.508	0.343378
Cct5	0.000108954	-0.264344	0.238	0.329	1
Med29	0.000650165	-0.26443	0.195	0.267	1
Gng5	9.86976e-20	-0.264986	0.92	0.961	2.0309e-15
Arf5	3.46204e-07	-0.265071	0.427	0.555	0.00712385
Uqcrb	4.4845e-09	-0.265153	0.66	0.796	9.22777e-05
Gps1	6.86455e-07	-0.265255	0.105	0.198	0.0141252
Uchl3	1.361e-05	-0.266641	0.169	0.265	0.280053
Sarnp	2.41481e-06	-0.266727	0.406	0.539	0.0496895
Rpn2	0.000278661	-0.267026	0.118	0.186	1
Srp9	3.13804e-06	-0.267761	0.403	0.52	0.0645715
Sdhb	7.25575e-08	-0.267843	0.335	0.488	0.00149301
Sem1	7.21633e-12	-0.267852	0.756	0.863	1.4849e-07
1110008F13Rik	3.85571e-05	-0.26835	0.239	0.337	0.793389
Csrp2	1.61201e-08	-0.268434	0.738	0.831	0.000331702
Nhp2	1.6407e-06	-0.268635	0.15	0.251	0.0337607
Farsb	0.000169322	-0.268722	0.058	0.112	1
Penk	0.00223543	-0.270116	0.061	0.106	1
Mrps12	1.15786e-05	-0.270156	0.14	0.229	0.238252
Pfdn4	3.08683e-05	-0.270496	0.265	0.363	0.635178
Cmpk1	0.00122171	-0.270962	0.184	0.249	1
Orc6	8.18948e-06	-0.27109	0.22	0.327	0.168515
Fkbp1a	3.44111e-07	-0.271499	0.492	0.635	0.00708078
Eif1ax	1.08117e-05	-0.271873	0.338	0.455	0.222473
Hmgn1	1.14133e-09	-0.272238	0.716	0.814	2.34851e-05
Ndufb4	1.15739e-06	-0.272453	0.335	0.471	0.0238156
Ostc	2.55086e-06	-0.272986	0.481	0.606	0.052489
Sh3bgrl3	2.67815e-06	-0.27311	0.368	0.5	0.0551082
Hypk	6.31286e-07	-0.273138	0.342	0.473	0.01299
Gpx8	1.12613e-05	-0.273237	0.283	0.392	0.231724
Eif2s1	6.98074e-05	-0.273785	0.19	0.278	1
Smim3	9.75416e-05	-0.274113	0.118	0.192	1
H2afv	4.74282e-09	-0.275428	0.624	0.769	9.7593e-05
Psmd7	1.13205e-05	-0.275493	0.209	0.308	0.232942
Ap3s1	4.68148e-05	-0.276317	0.211	0.306	0.963308
Mrpl34	6.05396e-06	-0.276912	0.286	0.398	0.124572
Hmgb1	8.66161e-12	-0.27695	0.785	0.865	1.7823e-07
Ubl4a	4.42467e-05	-0.277016	0.099	0.171	0.910465
Sec61g	5.1231e-17	-0.278154	0.882	0.931	1.05418e-12
Drap1	2.91219e-05	-0.279532	0.214	0.31	0.599242
Unc45b	4.3166e-05	-0.280881	0.047	0.104	0.888227
Pgls	1.32677e-05	-0.280884	0.291	0.404	0.27301
Mrpl21	0.00019751	-0.280925	0.222	0.308	1
Dap	0.000222729	-0.2819	0.188	0.267	1
Lgals1	1.07042e-12	-0.282022	0.822	0.88	2.2026e-08
Ssna1	0.000320415	-0.282758	0.186	0.261	1
Eif5a	2.92319e-11	-0.282777	0.548	0.718	6.01504e-07
Pdcd5	1.83275e-08	-0.283706	0.521	0.665	0.000377125
Srm	1.19735e-06	-0.283905	0.107	0.198	0.024638
Vdac1	5.111e-06	-0.284119	0.406	0.537	0.105169
U2af1	3.65722e-08	-0.284321	0.416	0.573	0.000752547
Ndufb7	1.19604e-05	-0.284464	0.312	0.42	0.246109
Gkn3	6.55582e-05	-0.284645	0.108	0.184	1
Txn2	1.14793e-05	-0.285123	0.14	0.229	0.23621
Sumo1	1.86625e-06	-0.285131	0.482	0.614	0.0384019
Tagln	1.64048e-06	-0.285135	0.674	0.792	0.0337561
Psenen	8.47567e-05	-0.285344	0.27	0.365	1
S100a10	1.40904e-07	-0.286063	0.422	0.567	0.00289937
Rex1bd	2.27094e-05	-0.287013	0.175	0.267	0.467292
Cetn3	1.08628e-07	-0.287214	0.344	0.488	0.00223523
Mdk	2.55545e-08	-0.287334	0.609	0.739	0.000525834
Ufm1	0.00241914	-0.287337	0.195	0.259	1
Mgp	0.00131264	-0.287941	0.599	0.665	1
Tomm7	6.00403e-08	-0.288315	0.522	0.659	0.00123545
Strap	8.5217e-06	-0.288575	0.175	0.269	0.175351
Timm17b	1.71969e-05	-0.289298	0.166	0.257	0.35386
Tkt	0.00117656	-0.289339	0.111	0.167	1
Rps17	6.79088e-16	-0.290896	0.833	0.912	1.39736e-11
Srsf3	1.71348e-06	-0.290902	0.428	0.549	0.0352584
Psma7	3.22169e-07	-0.292176	0.496	0.624	0.00662927
H2afj	1.63633e-05	-0.292769	0.303	0.408	0.336707
Rpl22l1	3.59253e-19	-0.292964	0.889	0.959	7.39236e-15
Arpc4	4.69645e-05	-0.293222	0.282	0.38	0.966389
Mrpl33	7.95537e-05	-0.293628	0.264	0.355	1
Zcrb1	4.09538e-06	-0.295097	0.327	0.443	0.0842707
Eny2	1.62213e-07	-0.295437	0.334	0.467	0.00333786
Rbx1	7.90817e-09	-0.295605	0.586	0.718	0.000162726
Pin1	0.00111322	-0.295617	0.174	0.239	1
Bccip	0.000555758	-0.295895	0.127	0.192	1
Cirbp	6.29873e-05	-0.296206	0.19	0.276	1
Psma4	1.42131e-08	-0.297967	0.321	0.473	0.000292462
Psma3	2.81179e-09	-0.298505	0.451	0.616	5.78583e-05
Glipr2	1.64748e-06	-0.2988	0.142	0.241	0.0339002
Atp5e	1.00758e-13	-0.298933	0.752	0.876	2.07329e-09
Ndufa11	1.21712e-06	-0.299389	0.42	0.545	0.0250447
Gtf2a2	4.9147e-06	-0.2997	0.311	0.424	0.10113
Denr	9.57159e-06	-0.299975	0.259	0.361	0.196955
Atpif1	3.74434e-11	-0.300437	0.676	0.812	7.70472e-07
Minos1	2.3682e-06	-0.300716	0.439	0.563	0.0487304
Tbca	8.03268e-10	-0.300937	0.624	0.739	1.65289e-05
Eloc	5.87173e-07	-0.301466	0.462	0.592	0.0120823
Mrpl17	1.34526e-05	-0.303025	0.325	0.433	0.276814
Mdh1	2.27405e-07	-0.303551	0.369	0.508	0.00467932
Tmsb4x	5.94033e-22	-0.30377	0.999	1	1.22234e-17
Echs1	6.75365e-06	-0.304073	0.196	0.296	0.13897
Hmgn3	2.12891e-05	-0.304903	0.193	0.286	0.438066
Cox5a	3.95079e-10	-0.307604	0.526	0.678	8.12954e-06
Ppil1	6.01977e-06	-0.308655	0.083	0.159	0.123869
Magoh	1.64614e-08	-0.309299	0.376	0.527	0.000338726
Ndufa13	6.93679e-07	-0.31158	0.481	0.618	0.0142738
Khdrbs3	3.95684e-05	-0.312206	0.07	0.135	0.814198
Psmc4	3.72575e-07	-0.313423	0.117	0.214	0.00766647
Psmb1	7.68809e-07	-0.313827	0.417	0.545	0.0158198
Atp5l	1.65408e-12	-0.313922	0.655	0.831	3.40361e-08
Id3	2.03197e-08	-0.314741	0.662	0.769	0.000418119
Psme2	6.26893e-06	-0.317405	0.152	0.247	0.128996
Cxcl12	2.428e-07	-0.317484	0.547	0.688	0.00499609
Ppa1	4.55224e-09	-0.317966	0.145	0.271	9.36715e-05
Nedd8	3.21113e-09	-0.318143	0.508	0.649	6.60754e-05
Mrpl20	1.12002e-09	-0.318158	0.305	0.463	2.30466e-05
H2afz	9.46272e-13	-0.319039	0.917	0.951	1.94714e-08
Snrpd2	5.01943e-10	-0.319233	0.491	0.651	1.03285e-05
Lsm2	4.56893e-06	-0.320323	0.255	0.369	0.0940148
Ndufa5	7.32068e-08	-0.320403	0.369	0.514	0.00150638
Elob	7.76685e-15	-0.320726	0.762	0.871	1.59819e-10
Bcl2l12	8.03539e-09	-0.320751	0.05	0.135	0.000165344
Bex3	1.50163e-07	-0.321059	0.653	0.757	0.0030899
Ndufa12	1.48865e-09	-0.321453	0.304	0.469	3.06319e-05
Tmem160	1.13653e-06	-0.323305	0.133	0.231	0.0233864
Ptn	5.98737e-09	-0.323627	0.547	0.716	0.000123202
Aprt	7.11895e-06	-0.323702	0.326	0.441	0.146487
Tmem167	6.65805e-09	-0.323841	0.469	0.629	0.000137003
Abracl	1.66145e-06	-0.324503	0.425	0.535	0.0341877
Prdx2	7.64083e-14	-0.324872	0.726	0.831	1.57225e-09
Cox7b	2.11856e-11	-0.325054	0.574	0.731	4.35937e-07
Cct7	5.48571e-06	-0.327646	0.192	0.29	0.112879
Sumo2	7.5043e-14	-0.327987	0.736	0.851	1.54416e-09
Brix1	3.56043e-07	-0.328292	0.163	0.271	0.0073263
Bud31	5.3094e-07	-0.328312	0.206	0.32	0.0109252
Hmgb3	1.51937e-07	-0.329834	0.205	0.329	0.00312641
Dnajc19	1.25205e-05	-0.329846	0.205	0.304	0.257633
Prmt1	3.02722e-08	-0.33063	0.355	0.5	0.00062291
Manf	1.12876e-06	-0.334675	0.387	0.506	0.0232264
Uqcc2	5.0033e-10	-0.335206	0.391	0.553	1.02953e-05
Glo1	1.99293e-08	-0.335977	0.252	0.392	0.000410084
Mydgf	0.00220306	-0.336858	0.141	0.198	1
Ppia	1.05632e-34	-0.337515	0.985	0.996	2.17359e-30
Etfb	1.20584e-06	-0.339726	0.222	0.337	0.0248126
Phf5a	6.69891e-08	-0.340111	0.224	0.349	0.00137843
Snrpd1	7.06883e-13	-0.341581	0.55	0.735	1.45455e-08
Atp5j2	6.02076e-12	-0.341844	0.535	0.729	1.23889e-07
Dcun1d5	3.32161e-06	-0.34232	0.214	0.318	0.0683487
Dtymk	5.36979e-09	-0.342521	0.271	0.418	0.000110494
Taldo1	2.92546e-09	-0.345326	0.217	0.357	6.01971e-05
Rbm3	2.7674e-11	-0.348878	0.446	0.62	5.69447e-07
Arf4	2.67921e-11	-0.34942	0.428	0.59	5.51301e-07
Ndufb2	3.95344e-08	-0.349977	0.318	0.465	0.000813499
Ran	9.23518e-14	-0.350513	0.665	0.81	1.90032e-09
Serf2	8.64828e-32	-0.350925	0.94	0.988	1.77956e-27
Ndufs5	8.93608e-10	-0.351683	0.382	0.537	1.83878e-05
Edf1	5.33786e-10	-0.352735	0.366	0.531	1.09837e-05
Selenoh	2.60833e-09	-0.353149	0.442	0.594	5.36716e-05
Myl9	4.40138e-06	-0.354975	0.303	0.42	0.0905671
Sf3b5	3.45997e-09	-0.355116	0.358	0.512	7.11958e-05
Atp5h	1.54061e-12	-0.355935	0.59	0.757	3.17011e-08
Mrto4	5.98628e-07	-0.357252	0.152	0.255	0.012318
Cycs	3.17917e-13	-0.357463	0.537	0.733	6.54179e-09
Tbcb	2.16552e-09	-0.35803	0.268	0.414	4.456e-05
Tubb2a	1.73131e-06	-0.35804	0.148	0.245	0.0356252
Park7	8.93642e-09	-0.35806	0.335	0.482	0.000183885
Siva1	4.47753e-09	-0.362159	0.376	0.535	9.21341e-05
Psmb5	1.89407e-11	-0.370907	0.369	0.549	3.89742e-07
1810037I17Rik	4.16994e-11	-0.372632	0.421	0.602	8.58048e-07
Tnni1	5.92665e-07	-0.373938	0.183	0.3	0.0121953
Pomp	6.22607e-10	-0.375954	0.319	0.476	1.28114e-05
Dynll1	4.09107e-21	-0.376073	0.794	0.902	8.4182e-17
Ubl5	8.83475e-14	-0.37943	0.477	0.673	1.81793e-09
Ppp1r14b	1.31017e-11	-0.38591	0.32	0.492	2.69595e-07
Srsf2	5.98942e-11	-0.386143	0.205	0.361	1.23244e-06
Sec61b	1.81122e-17	-0.387471	0.677	0.814	3.72694e-13
Psmb6	4.00517e-10	-0.388882	0.293	0.451	8.24144e-06
Rbp1	3.29257e-14	-0.395423	0.682	0.824	6.77513e-10
Myl6	1.86024e-23	-0.395876	0.823	0.931	3.82781e-19
Smarcb1	7.03379e-06	-0.396109	0.099	0.178	0.144734
Alyref	5.89606e-12	-0.404385	0.364	0.539	1.21323e-07
Dad1	1.39868e-11	-0.409973	0.439	0.608	2.87807e-07
Uqcrq	7.60245e-14	-0.417291	0.474	0.659	1.56436e-09
Ranbp1	2.44214e-13	-0.417688	0.519	0.678	5.0252e-09
Pclaf	1.02213e-06	-0.418317	0.299	0.439	0.0210324
Ube2s	6.83737e-10	-0.419799	0.402	0.557	1.40693e-05
S100a11	5.31973e-17	-0.4208	0.587	0.776	1.09464e-12
Tmem14c	6.22727e-10	-0.425328	0.276	0.422	1.28138e-05
Lsm3	1.996e-08	-0.430054	0.21	0.341	0.000410718
Krtcap2	4.05601e-14	-0.433534	0.522	0.696	8.34606e-10
Cenpa	5.17324e-07	-0.434612	0.218	0.339	0.010645
Atox1	3.19937e-11	-0.446776	0.362	0.527	6.58334e-07
Sf3b6	8.58629e-18	-0.454816	0.335	0.561	1.7668e-13
Nme1	3.94309e-13	-0.455089	0.373	0.557	8.1137e-09
Smdt1	4.9889e-17	-0.463911	0.411	0.629	1.02657e-12
Ndufa4	9.47826e-27	-0.467162	0.761	0.89	1.95034e-22
Prdx5	1.41505e-11	-0.469423	0.177	0.329	2.91175e-07
Gtf2h5	6.25545e-14	-0.478934	0.346	0.535	1.28718e-09
Rps27l	5.13807e-18	-0.48005	0.558	0.745	1.05726e-13
Lsm6	2.40048e-13	-0.488588	0.36	0.539	4.93946e-09
Psmb3	2.12565e-14	-0.495492	0.411	0.594	4.37396e-10
Prdx1	3.04536e-28	-0.507133	0.657	0.839	6.26644e-24
Gm10076	7.33896e-21	-0.520349	0.507	0.7	1.51014e-16
Atp5g1	2.6682e-29	-0.556164	0.519	0.759	5.49036e-25
Acta2	4.27038e-21	-0.695447	0.468	0.688	8.78716e-17
Xist	7.48023e-51	-0.961695	0	0.224	1.53921e-46

## Sheet: c3
gene	p_val	avg_logFC	pct.1	pct.2	p_val_adj
Gm42418	2.6792e-24	1.24875	0.55	0.165	5.51299e-20
Malat1	9.29125e-23	0.760787	0.99	0.995	1.91186e-18
Nppb	0.0557383	0.670512	0.51	0.469	1
Ankrd1	4.9793e-06	0.648223	0.93	0.937	0.102459
Igf2r	6.43256e-12	0.638745	0.97	0.944	1.32363e-07
Ttn	3.62893e-16	0.529115	0.94	0.977	7.46725e-12
Mgp	1.48742e-05	0.509276	0.18	0.066	0.306066
Hk2	6.29666e-08	0.488225	0.67	0.491	0.00129566
Ccnd2	1.80678e-06	0.484498	0.74	0.712	0.0371781
Nme2	6.45443e-16	0.481832	0.89	0.866	1.32813e-11
Tgfb2	0.0108295	0.478115	0.49	0.409	1
Nexn	2.6727e-13	0.474169	0.92	0.977	5.49962e-09
Gm11808	9.50556e-17	0.471656	0.9	0.916	1.95596e-12
Uba52	1.30562e-33	0.47145	0.98	0.996	2.68658e-29
Eif3c	3.59657e-07	0.466841	0.81	0.762	0.00740066
Bnip3	2.02289e-08	0.450829	0.86	0.739	0.000416249
Vcan	4.55234e-09	0.43537	0.8	0.671	9.36735e-05
Id2	0.0483181	0.433292	0.62	0.62	1
Ncl	8.33112e-06	0.424545	0.8	0.794	0.17143
Spry2	6.80416e-05	0.413227	0.76	0.721	1
Myadm	0.000191331	0.399611	0.66	0.591	1
Myh9	0.00170386	0.397598	0.25	0.146	1
Ddah1	5.18227e-06	0.396462	0.62	0.48	0.106636
Hddc3	3.32352e-14	0.394757	0.35	0.104	6.8388e-10
Rpl13a	5.21947e-08	0.379819	0.83	0.835	0.00107401
Fam162a	7.12073e-14	0.376115	0.93	0.981	1.46523e-09
Ktn1	2.91627e-06	0.375383	0.77	0.732	0.060008
Nebl	1.76697e-07	0.369732	0.85	0.878	0.0036359
Hsp90b1	2.72615e-05	0.361569	0.89	0.96	0.560959
Csrp3	4.54534e-08	0.352661	0.94	0.989	0.000935295
Actb	0.0825235	0.339239	0.96	0.966	1
Slc8a1	2.07072e-13	0.336579	0.41	0.146	4.26092e-09
Gpx3	0.00296672	0.3331	0.79	0.853	1
Popdc2	1.15041e-05	0.329072	0.79	0.759	0.23672
Rab28	0.217436	0.328399	0.17	0.233	1
Prpf4b	5.84053e-05	0.323763	0.6	0.46	1
Rps28	1.1193e-18	0.317837	1	1	2.30319e-14
Rack1	3.88479e-12	0.315038	0.95	0.975	7.99373e-08
Fibp	0.0056257	0.314239	0.63	0.606	1
Bves	0.000378291	0.312439	0.75	0.683	1
Timm23	0.000302019	0.310534	0.37	0.237	1
Alpk3	0.000136471	0.310095	0.57	0.431	1
Ifitm2	0.0585501	0.307703	0.66	0.611	1
H1f0	0.580342	0.306266	0.46	0.521	1
Eif2s3y	2.32784e-92	0.306162	0.39	0	4.78999e-88
Smim4	0.000281954	0.304194	0.64	0.529	1
Myh6	5.92031e-06	0.303356	0.85	0.787	0.121822
Xbp1	0.00822042	0.300834	0.48	0.38	1
Hes1	0.152253	0.300162	0.54	0.527	1
Prrc2c	0.032567	0.297641	0.58	0.513	1
Mpped2	0.0188938	0.296097	0.74	0.697	1
Bloc1s1	0.000436883	0.295584	0.79	0.762	1
Eno1	3.31785e-07	0.295071	0.94	0.95	0.00682714
Csnk2a1	0.0467251	0.294409	0.49	0.445	1
Pdia3	4.5428e-06	0.292323	0.88	0.881	0.0934771
Apoe	0.00609992	0.291818	0.33	0.221	1
Cox17	2.46291e-11	0.289919	0.94	0.976	5.06793e-07
Set	9.55359e-05	0.28948	0.9	0.934	1
mt-Atp8	7.24889e-06	0.289026	0.71	0.63	0.14916
Casq1	0.00366004	0.287451	0.53	0.444	1
Qpct	0.000452222	0.286489	0.35	0.213	1
Kdm6b	0.112933	0.286385	0.48	0.433	1
Plod2	0.00476757	0.28425	0.35	0.241	1
Egln1	0.00351418	0.283096	0.59	0.488	1
Prelid2	0.000943945	0.27778	0.63	0.548	1
Slc38a2	0.00095793	0.276454	0.8	0.81	1
Bnip3l	0.00158431	0.276411	0.8	0.803	1
Grcc10	0.000757326	0.275362	0.68	0.661	1
Snhg6	9.15811e-05	0.275088	0.84	0.868	1
Nsa2	1.59191e-06	0.273349	0.85	0.886	0.0327568
Appl1	0.0770814	0.272824	0.34	0.27	1
Ddc	0.000403571	0.272037	0.28	0.158	1
Efhd2	0.0915235	0.271666	0.53	0.486	1
Ank3	0.00120434	0.270789	0.63	0.599	1
Khsrp	0.653122	0.270736	0.34	0.346	1
mt-Nd6	0.00965031	0.268824	0.6	0.558	1
Tagln	0.0202531	0.267369	0.94	0.887	1
Stag2	0.0506435	0.266619	0.37	0.293	1
Nme7	0.0398143	0.266264	0.37	0.312	1
Mest	0.0173586	0.266142	0.74	0.683	1
Atp1a1	0.000466474	0.263654	0.83	0.858	1
Lrrc8a	0.274488	0.260774	0.28	0.258	1
Clu	0.213987	0.260748	0.56	0.577	1
Dpysl3	0.0449271	0.256806	0.63	0.649	1
Rpl10	1.33018e-08	0.254561	0.98	0.998	0.00027371
Senp2	0.264093	0.253455	0.17	0.137	1
Ckap4	0.0325859	0.253024	0.62	0.571	1
Eea1	0.00359359	0.252854	0.33	0.212	1
Eef1a1	9.51462e-12	0.25058	1	0.999	1.95782e-07
Uqcrb	2.84695e-09	-0.251183	0.95	1	5.85816e-05
Hspa8	7.60414e-08	-0.251971	0.95	0.993	0.0015647
Park7	2.62189e-06	-0.252429	0.77	0.951	0.0539506
Cops8	7.5609e-07	-0.256717	0.31	0.555	0.0155581
Jun	7.23618e-07	-0.25703	0.55	0.777	0.0148899
Myl7	7.17737e-06	-0.260988	0.99	1	0.147689
Itgb3bp	4.34652e-06	-0.262118	0.48	0.677	0.0894383
Alyref	6.16259e-07	-0.26289	0.68	0.902	0.0126808
Ube2t	5.82829e-07	-0.26469	0.23	0.497	0.0119929
Dusp1	1.14899e-05	-0.266107	0.27	0.496	0.236428
Dld	3.80822e-07	-0.26725	0.52	0.747	0.00783617
mt-Atp6	6.78354e-14	-0.268782	1	0.999	1.39585e-09
Txnl1	9.50956e-07	-0.270028	0.66	0.893	0.0195678
Map1lc3a	5.40225e-09	-0.27025	0.67	0.907	0.000111162
Trappc2l	3.71253e-07	-0.271576	0.63	0.838	0.00763928
Cfl2	4.80635e-09	-0.275204	0.83	0.971	9.89003e-05
Jund	1.59015e-08	-0.276014	0.79	0.935	0.000327204
Acads	1.88756e-09	-0.278403	0.3	0.604	3.88403e-05
Tsc22d1	1.36794e-06	-0.278654	0.59	0.846	0.0281481
Snrpe	8.40389e-10	-0.279281	0.89	0.993	1.72927e-05
Atf3	2.22938e-07	-0.284707	0.34	0.621	0.00458739
Emc2	2.13963e-08	-0.291144	0.58	0.793	0.000440271
Mhrt	8.75037e-06	-0.294404	0.34	0.549	0.180056
Mtx2	3.01187e-09	-0.302595	0.76	0.939	6.19752e-05
Rrm2	0.00217997	-0.30491	0.37	0.514	1
Cst3	2.60472e-07	-0.317566	0.91	0.993	0.00535973
Rrad	2.83374e-09	-0.319583	0.37	0.692	5.83099e-05
1810037I17Rik	2.05911e-09	-0.324591	0.8	0.956	4.23704e-05
Smpx	4.49122e-08	-0.325291	0.95	0.977	0.000924159
Ramp1	3.70664e-07	-0.327283	0.28	0.511	0.00762716
Sox4	2.22784e-07	-0.338094	0.41	0.659	0.00458423
Cirbp	4.33364e-10	-0.341983	0.63	0.861	8.91733e-06
Pla2g16	9.70569e-11	-0.345069	0.36	0.683	1.99714e-06
Cited1	0.279112	-0.369984	0.63	0.632	1
Sfrp1	1.22577e-07	-0.371889	0.74	0.901	0.00252226
Nppa	0.0127701	-0.372055	0.13	0.252	1
Trdn	1.40118e-09	-0.373244	0.62	0.824	2.88321e-05
Tnni1	3.67296e-32	-0.437063	0.97	0.999	7.55785e-28
Egr1	3.26459e-10	-0.453201	0.11	0.42	6.71755e-06
5430431A17Rik	6.8418e-12	-0.455654	0.78	0.948	1.40784e-07
Gadd45g	2.75075e-11	-0.463449	0.51	0.835	5.66021e-07
Gm10076	7.27659e-23	-0.47295	0.89	0.972	1.4973e-18
Ctgf	6.2949e-11	-0.49866	0.46	0.767	1.2953e-06
Acta2	3.34425e-09	-0.551645	0.85	0.953	6.88146e-05
Tcap	9.4862e-19	-0.64624	0.65	0.913	1.95197e-14
Fos	1.22353e-15	-0.666085	0.39	0.767	2.51767e-11
Xist	1.0124e-42	-1.05486	0	0.822	2.08322e-38

## Sheet: c4
gene	p_val	avg_logFC	pct.1	pct.2	p_val_adj
Gm42418	0.000472159	0.99441	0.451	0.205	1
Malat1	3.51475e-11	0.832438	0.995	1	7.23231e-07
Hk2	0.00017867	0.757724	0.665	0.705	1
Igfbp5	0.527454	0.695401	0.502	0.591	1
Hspa1b	0.124155	0.689539	0.174	0.091	1
Nexn	6.11484e-08	0.687557	0.821	0.75	0.00125825
Cryab	0.0690737	0.684701	0.865	0.864	1
Hspa1a	0.389636	0.683768	0.219	0.182	1
Cox8b	0.00894801	0.585766	0.34	0.182	1
Hspb1	0.0822264	0.581884	0.927	0.909	1
Slc2a3	0.122491	0.578121	0.468	0.477	1
Uba52	1.92951e-13	0.56387	0.946	1	3.97036e-09
Bnip3	0.000269062	0.559261	0.794	0.773	1
Krt18	0.629833	0.556419	0.421	0.455	1
Ktn1	0.0232688	0.543728	0.623	0.682	1
Pam	0.0104128	0.542893	0.862	0.886	1
Snhg6	0.0238333	0.454962	0.696	0.818	1
Phpt1	0.0644644	0.442287	0.549	0.568	1
Mt1	0.0165018	0.438529	0.766	0.682	1
Ankrd1	0.000778789	0.435829	0.928	0.795	1
Gpx3	0.0734757	0.434874	0.693	0.705	1
Cox4i2	0.100233	0.434005	0.529	0.477	1
Ero1l	0.0866069	0.426519	0.452	0.386	1
Ttn	0.00606596	0.423877	0.784	0.818	1
Cdkn1a	0.389394	0.415427	0.372	0.386	1
S100a1	0.573143	0.409703	0.49	0.568	1
mt-Nd6	0.470934	0.407291	0.599	0.682	1
Pln	0.0882025	0.40384	0.722	0.818	1
Pafah1b1	0.231178	0.394414	0.545	0.591	1
Alkbh5	0.617008	0.392156	0.59	0.682	1
Smim4	0.116393	0.389644	0.444	0.386	1
Cox7a2l	0.0157787	0.385485	0.725	0.818	1
Lgals3	0.115428	0.38072	0.175	0.091	1
Ccdc141	0.272647	0.380238	0.471	0.5	1
1810022K09Rik	0.0298798	0.377304	0.717	0.795	1
Eif2s3y	4.12488e-05	0.375821	0.287	0	0.848776
Eif2s2	0.00797809	0.375417	0.781	0.909	1
Pcgf5	0.610307	0.369884	0.53	0.636	1
Mbnl2	0.561966	0.367708	0.432	0.455	1
Gm11808	0.00355069	0.367576	0.746	0.909	1
Igf2r	0.0445904	0.362308	0.832	0.886	1
Vegfa	0.459492	0.362086	0.499	0.568	1
Bsg	0.00074186	0.360833	0.946	0.977	1
Nsa2	0.0431508	0.354425	0.707	0.864	1
Sars	0.335648	0.342875	0.425	0.455	1
Higd1a	0.00261117	0.342502	0.911	0.909	1
Spry2	0.936558	0.342277	0.645	0.773	1
Nebl	0.202623	0.341225	0.61	0.636	1
Sh3glb1	0.285774	0.339259	0.656	0.773	1
Naa35	0.410643	0.338379	0.359	0.364	1
Ccnd2	0.797948	0.336451	0.552	0.727	1
Sik1	0.116061	0.331328	0.2	0.114	1
Pttg1	0.449933	0.330567	0.39	0.545	1
Ctsl	0.624998	0.329555	0.689	0.818	1
Slc2a1	0.0882775	0.328962	0.759	0.818	1
Ank3	0.593108	0.326196	0.441	0.477	1
Prpf4b	0.588906	0.322618	0.45	0.5	1
Lamtor3	0.591165	0.320634	0.437	0.523	1
Dynlt1a	0.254377	0.319238	0.24	0.182	1
Cystm1	0.955965	0.317618	0.477	0.614	1
Fxr1	0.693521	0.317291	0.567	0.727	1
Bnip3l	0.241103	0.316897	0.663	0.795	1
Rgcc	0.0144614	0.310682	0.224	0.068	1
Afdn	0.173367	0.30843	0.454	0.409	1
Loxl2	0.981519	0.30635	0.51	0.659	1
mt-Atp8	0.617519	0.306047	0.517	0.568	1
Prelid2	0.29059	0.305642	0.58	0.614	1
Slc38a2	0.636183	0.305358	0.7	0.864	1
Tnc	0.325091	0.305038	0.159	0.114	1
Csnk2a2	0.379237	0.303276	0.367	0.364	1
Rps7	1.51291e-07	0.296713	0.988	1	0.00311312
Ogdhl	0.147113	0.295451	0.223	0.136	1
Wwp1	0.024361	0.295304	0.203	0.068	1
Alpk3	0.637965	0.293433	0.4	0.432	1
Plod2	0.687407	0.29316	0.471	0.545	1
Kdm6b	0.453357	0.291964	0.42	0.409	1
Wbp4	0.669549	0.290425	0.362	0.364	1
Lmo4	0.420412	0.288653	0.47	0.477	1
Cited2	0.989548	0.286846	0.532	0.636	1
Slc8a1	0.00333547	0.285691	0.237	0.045	1
Nme2	0.35714	0.284779	0.693	0.841	1
S100a6	0.863523	0.281746	0.137	0.136	1
Appl1	0.0165904	0.279142	0.288	0.136	1
Rala	0.904233	0.277256	0.454	0.568	1
Fam198b	0.349534	0.276467	0.358	0.318	1
Hikeshi	0.373728	0.274478	0.555	0.659	1
Btg3	0.435842	0.273635	0.305	0.295	1
Pdcd6	0.39236	0.273447	0.451	0.455	1
Zfp106	0.560066	0.272318	0.397	0.432	1
Bhlhe41	0.874441	0.271248	0.237	0.25	1
H2-Ab1	0.278003	0.270464	0.472	0.432	1
Tmem60	0.940973	0.26997	0.479	0.591	1
Supt16	0.512456	0.269304	0.333	0.432	1
Dag1	0.568775	0.264494	0.477	0.5	1
Ncam1	0.534254	0.264169	0.417	0.523	1
Serpinb6b	0.169353	0.2637	0.244	0.159	1
Lmod3	0.947224	0.261793	0.323	0.364	1
Ddx3y	0.00084654	0.261491	0.207	0	1
Lnpep	0.37017	0.261295	0.24	0.205	1
Rsl1d1	0.952798	0.260426	0.502	0.636	1
Hsp90aa1	0.53405	0.259809	0.785	0.955	1
Hectd1	0.552563	0.258588	0.301	0.295	1
Arhgap5	0.916744	0.258025	0.452	0.5	1
Eif3c	0.556171	0.25799	0.617	0.727	1
Mak16	0.244536	0.25754	0.278	0.227	1
Aldoa	0.000278449	0.256212	0.957	0.977	1
Uqcrfs1	0.0205459	0.255653	0.798	0.864	1
P4ha2	0.818407	0.254482	0.358	0.455	1
Vdac2	0.0309073	0.25156	0.83	0.932	1
Cox6a2	0.0901975	0.250682	0.853	0.841	1
Xxylt1	1.35396e-05	-0.25005	0.042	0.182	0.278604
Gt(ROSA)26Sor	0.000359494	-0.251311	0.248	0.5	1
Rcn3	8.26194e-09	-0.251464	0.309	0.75	0.000170006
Cenph	5.64174e-05	-0.251581	0.104	0.295	1
App	2.99698e-06	-0.251805	0.353	0.705	0.0616688
Srl	0.00263149	-0.252515	0.235	0.432	1
Gpx8	0.000143672	-0.253227	0.306	0.568	1
Atad2	7.61475e-08	-0.254262	0.208	0.568	0.00156689
Pcdh7	0.0178232	-0.255255	0.32	0.5	1
Hnrnpm	8.96184e-07	-0.255608	0.397	0.75	0.0184408
Rcn1	9.31773e-09	-0.256932	0.308	0.727	0.000191731
Apbb1	1.021e-05	-0.257353	0.071	0.25	0.21009
Cks2	0.00011104	-0.257365	0.453	0.773	1
Cthrc1	0.175153	-0.257694	0.135	0.205	1
Nup88	7.30265e-07	-0.257966	0.194	0.5	0.0150267
Trir	7.15616e-05	-0.258859	0.346	0.659	1
Sox12	5.26492e-06	-0.259762	0.174	0.455	0.108336
Dnajb11	2.03056e-06	-0.260277	0.23	0.545	0.0417827
Slbp	6.8687e-07	-0.26076	0.255	0.591	0.0141337
Ociad2	0.0125323	-0.260931	0.125	0.25	1
Mlf2	3.30913e-06	-0.261232	0.395	0.75	0.068092
Edf1	3.88937e-05	-0.261647	0.59	0.864	0.800316
Sumo2	0.00305779	-0.262185	0.806	0.977	1
Ywhaq	6.47466e-05	-0.262701	0.636	0.955	1
mt-Atp6	0.000354233	-0.26321	0.996	1	1
Canx	4.97849e-06	-0.263255	0.591	0.932	0.102442
Rplp0	1.82702e-05	-0.263809	0.862	1	0.375946
Calm3	6.07313e-05	-0.263822	0.415	0.727	1
Smyd2	6.24219e-05	-0.26391	0.358	0.614	1
Fdps	2.30056e-05	-0.264801	0.302	0.591	0.473386
Tnnc1	0.0055729	-0.264802	0.905	0.841	1
Igfbp4	0.00445196	-0.266275	0.07	0.182	1
Fip1l1	0.0257122	-0.266482	0.279	0.409	1
Ddah2	9.35836e-06	-0.267701	0.338	0.636	0.192567
Cks1b	9.30217e-06	-0.26856	0.502	0.864	0.191411
Ppp1r14b	3.90055e-05	-0.269061	0.632	0.886	0.802617
G0s2	9.40704e-07	-0.270563	0.269	0.614	0.0193569
Fbxl14	0.00157697	-0.271208	0.098	0.25	1
Mtch1	9.07275e-05	-0.271947	0.374	0.636	1
Cdc26	2.80711e-05	-0.272057	0.386	0.705	0.577619
Psmd13	8.67316e-08	-0.272936	0.29	0.659	0.00178468
Tpx2	4.87021e-05	-0.273075	0.124	0.341	1
Arpc3	6.86901e-06	-0.273625	0.474	0.818	0.141344
Pde4b	0.0321804	-0.274524	0.071	0.159	1
Med19	5.25486e-11	-0.275574	0.204	0.614	1.08129e-06
Csrp2	0.00105954	-0.275846	0.783	0.955	1
Bcl2l12	7.88281e-08	-0.276952	0.089	0.341	0.00162205
Tsc22d3	1.05642e-08	-0.277077	0.271	0.636	0.000217379
Dpm3	0.000364604	-0.277786	0.5	0.795	1
Erg28	1.13263e-07	-0.279286	0.179	0.5	0.00233061
Uhrf1	1.46161e-07	-0.280012	0.075	0.295	0.00300756
Nucb1	0.00079575	-0.280054	0.097	0.25	1
2810403A07Rik	0.000805444	-0.281207	0.115	0.273	1
Josd2	2.28514e-08	-0.284285	0.319	0.705	0.000470214
Tm9sf3	2.44655e-06	-0.284392	0.385	0.75	0.0503427
Tmem14c	8.27056e-06	-0.286551	0.591	0.932	0.170183
Ubl5	5.92335e-05	-0.286708	0.709	1	1
Tbca	2.73712e-05	-0.286992	0.839	0.977	0.563216
Sparc	0.000410195	-0.288152	0.783	0.955	1
Stub1	1.25251e-06	-0.288267	0.436	0.773	0.025773
Cnot2	4.02164e-06	-0.288571	0.182	0.455	0.0827533
Eme1	3.7022e-15	-0.289963	0.017	0.205	7.61801e-11
Gm45716	0.000114065	-0.29003	0.438	0.727	1
Calr	6.23211e-06	-0.290114	0.456	0.818	0.128238
Cops8	1.33885e-08	-0.29014	0.275	0.682	0.000275494
Ptma	0.00372552	-0.290445	0.927	0.977	1
Rbmxl1	1.32239e-06	-0.290764	0.333	0.659	0.0272109
Ppa1	3.83003e-06	-0.29154	0.359	0.682	0.0788106
Tagln2	0.0319001	-0.291549	0.459	0.636	1
Lsm6	1.23417e-05	-0.292622	0.611	0.909	0.253955
Ap2s1	1.42282e-06	-0.292632	0.448	0.773	0.0292773
Guk1	8.58924e-07	-0.294209	0.343	0.682	0.0176741
Mecom	0.0105887	-0.294391	0.077	0.182	1
Selenoh	4.60415e-05	-0.296326	0.644	0.955	0.947397
Mid1ip1	2.42164e-08	-0.296428	0.076	0.318	0.000498301
Gmnn	2.74804e-07	-0.299916	0.404	0.795	0.00565464
Cdca8	6.67995e-06	-0.30286	0.219	0.523	0.137453
G3bp2	9.95552e-06	-0.303317	0.386	0.705	0.204855
Mcm5	1.55173e-06	-0.3034	0.075	0.273	0.0319299
Hnrnph1	9.71872e-07	-0.304881	0.345	0.727	0.0199982
H3f3b	0.00478178	-0.304946	0.839	0.955	1
Srsf7	7.60327e-07	-0.305494	0.385	0.705	0.0156453
Ube2t	1.27205e-08	-0.305894	0.26	0.636	0.000261749
Bud31	1.23809e-05	-0.306802	0.417	0.75	0.254763
Srsf2	3.41889e-08	-0.307233	0.463	0.864	0.000703504
Gm1673	6.65299e-08	-0.307859	0.464	0.864	0.00136899
Timp2	0.000179068	-0.308308	0.252	0.5	1
Hnrnpd	1.03319e-06	-0.30888	0.496	0.841	0.02126
Hey2	0.000404278	-0.31056	0.222	0.455	1
Serpine2	0.000282348	-0.310619	0.142	0.341	1
Nono	1.20225e-08	-0.313838	0.405	0.818	0.000247388
Maged1	5.77016e-08	-0.313941	0.363	0.795	0.00118733
Usp1	3.50926e-11	-0.314789	0.169	0.568	7.22101e-07
Myl12b	1.19098e-07	-0.315863	0.197	0.523	0.00245067
Cdk2ap1	4.23385e-08	-0.317007	0.363	0.773	0.000871199
Srsf3	1.31071e-05	-0.317494	0.619	0.932	0.269705
Pet100	3.62949e-06	-0.317902	0.385	0.705	0.0746839
Txnip	7.59669e-05	-0.319278	0.176	0.409	1
Tmed2	2.46424e-06	-0.321035	0.619	0.955	0.0507068
Ccna2	4.77099e-08	-0.321043	0.208	0.568	0.000981727
Pdlim7	2.19742e-05	-0.32322	0.614	0.864	0.452162
Ppih	3.20869e-10	-0.324375	0.27	0.705	6.60252e-06
Ube2e3	4.67735e-09	-0.324541	0.411	0.864	9.62459e-05
Lsm4	4.45223e-05	-0.325472	0.643	0.909	0.916135
Spc25	2.98955e-06	-0.32717	0.151	0.409	0.0615161
Tmed9	6.36778e-06	-0.327553	0.465	0.795	0.13103
Uhrf2	1.82806e-05	-0.328212	0.214	0.477	0.37616
Mat2b	8.79636e-08	-0.334101	0.317	0.682	0.00181003
Calm2	1.06761e-05	-0.334192	0.628	0.932	0.219682
Birc5	0.000103902	-0.334569	0.311	0.591	1
Sox4	0.000874442	-0.335127	0.454	0.727	1
Cpsf6	1.94609e-07	-0.335649	0.22	0.545	0.00400448
Eln	0.20184	-0.335869	0.136	0.205	1
Flna	0.000399566	-0.337415	0.143	0.341	1
Ppil1	4.57647e-10	-0.337721	0.166	0.523	9.417e-06
Col1a2	0.00314558	-0.337985	0.148	0.318	1
Hnrnpa2b1	2.96094e-05	-0.338194	0.722	0.932	0.609273
Taldo1	2.3704e-06	-0.339347	0.474	0.75	0.0487757
Hmgb1	0.000112595	-0.339979	0.843	1	1
Mrpl33	5.13937e-08	-0.340963	0.585	0.932	0.00105753
Ptn	0.0888842	-0.342896	0.173	0.273	1
Mdk	3.2255e-07	-0.351677	0.482	0.886	0.00663712
Myoz2	0.000663244	-0.354949	0.359	0.614	1
Tnni2	0.0568753	-0.355704	0.098	0.182	1
Rbm3	7.4577e-07	-0.356253	0.623	0.932	0.0153457
Manf	1.49422e-06	-0.358031	0.532	0.909	0.0307466
Smpx	0.0471349	-0.358212	0.62	0.795	1
Scp2	1.56546e-08	-0.360534	0.194	0.523	0.000322124
Ranbp1	3.08536e-06	-0.360785	0.7	1	0.0634875
Stmn1	6.52799e-06	-0.36121	0.555	0.909	0.134326
Pdia6	5.43767e-07	-0.361364	0.529	0.909	0.0111891
Twist1	0.000519466	-0.363149	0.079	0.227	1
Fstl1	9.80492e-09	-0.364237	0.51	0.955	0.000201756
Myl2	0.00155961	-0.364845	0.857	0.864	1
Arl6ip1	0.00064512	-0.365989	0.358	0.614	1
Gadd45g	7.33137e-07	-0.368956	0.451	0.841	0.0150858
Ddx39b	5.50916e-08	-0.371476	0.513	0.909	0.00113362
Sephs1	1.1134e-11	-0.373116	0.072	0.364	2.29104e-07
Fkbp10	1.27596e-18	-0.374493	0.118	0.591	2.62554e-14
Lgals1	0.00726571	-0.375151	0.586	0.841	1
Mlec	2.06355e-10	-0.375251	0.167	0.545	4.24617e-06
Fbln2	0.00609886	-0.376144	0.084	0.205	1
Alyref	6.08564e-09	-0.387526	0.578	0.955	0.000125224
H1f0	0.000507678	-0.389111	0.395	0.659	1
Akt1	7.54365e-08	-0.389698	0.299	0.636	0.00155226
Cenpx	3.559e-09	-0.3906	0.339	0.75	7.32336e-05
Cdk1	1.79146e-06	-0.393361	0.301	0.659	0.0368629
Dut	7.50102e-07	-0.393498	0.481	0.841	0.0154349
Atox1	5.50156e-07	-0.399781	0.646	0.955	0.0113206
Tceal7	2.52969e-05	-0.400238	0.107	0.318	0.520535
Hspa5	6.74771e-06	-0.407682	0.594	0.932	0.138848
Hmgn3	2.87655e-12	-0.408441	0.256	0.727	5.91908e-08
Mgp	0.0380797	-0.414727	0.157	0.273	1
Cyr61	3.29401e-05	-0.419034	0.328	0.636	0.677808
Tubb5	8.66626e-05	-0.41931	0.782	0.909	1
Cirbp	8.487e-11	-0.422113	0.417	0.841	1.74637e-06
Mhrt	3.49061e-09	-0.423366	0.141	0.477	7.18263e-05
H2afv	3.78244e-07	-0.430427	0.611	0.977	0.00778312
H2afz	0.0001311	-0.446276	0.912	0.977	1
Tuba1a	2.39184e-07	-0.460198	0.558	0.909	0.00492168
Hapln1	0.000356242	-0.460853	0.033	0.136	1
Acta2	0.00208338	-0.479162	0.825	0.932	1
Sfpq	5.61691e-10	-0.480149	0.342	0.795	1.15579e-05
5430431A17Rik	3.44451e-06	-0.485201	0.523	0.795	0.0708777
Bgn	0.00626242	-0.490775	0.059	0.159	1
Pdlim3	1.17513e-05	-0.49621	0.51	0.818	0.241806
Tnni1	1.32978e-07	-0.496611	0.814	0.909	0.00273629
Prdx1	8.38597e-09	-0.502425	0.793	0.977	0.000172558
Pclaf	2.0118e-07	-0.514147	0.321	0.705	0.00413969
Tpm4	3.59377e-07	-0.521232	0.326	0.682	0.0073949
Sfrp2	0.0451107	-0.525988	0.077	0.159	1
Tcap	7.35257e-06	-0.530969	0.445	0.75	0.151294
Laptm4b	0.000750325	-0.531458	0.269	0.5	1
Gm10076	5.51716e-11	-0.539134	0.661	0.955	1.13527e-06
Rrm2	1.50065e-08	-0.570883	0.23	0.591	0.000308789
Hmgb2	6.97751e-06	-0.576156	0.646	0.886	0.143576
Postn	0.00120533	-0.591814	0.049	0.159	1
Tagln	0.00778734	-0.642081	0.819	0.886	1
Nppa	0.020259	-0.649803	0.081	0.182	1
Ctgf	3.11648e-08	-0.676646	0.452	0.864	0.000641277
H19	0.19835	-0.683945	0.737	0.841	1
Col3a1	0.00349324	-0.705512	0.161	0.318	1
Xist	9.84973e-204	-1.51333	0.001	0.909	2.02678e-199

## Sheet: c5
gene	p_val	avg_logFC	pct.1	pct.2	p_val_adj
Gm42418	5.52871e-26	0.864279	0.525	0.174	1.13764e-21
Malat1	2.45213e-56	0.8298	0.989	0.94	5.04575e-52
Bnip3	1.41098e-26	0.732515	0.634	0.306	2.90338e-22
Ncam1	2.95167e-22	0.716107	0.583	0.277	6.07366e-18
Ndufa4l2	9.80358e-27	0.663367	0.461	0.111	2.01728e-22
Fam162a	1.35845e-36	0.649915	0.932	0.82	2.79528e-32
Mt1	1.68565e-14	0.619014	0.358	0.126	3.46856e-10
Igf2r	3.19706e-15	0.605858	0.74	0.56	6.57859e-11
Aldoa	3.34202e-43	0.574653	0.954	0.94	6.87688e-39
Higd1a	5.96112e-24	0.5637	0.903	0.811	1.22662e-19
Hk2	9.64017e-16	0.559392	0.525	0.3	1.98366e-11
Tagln	1.5868e-10	0.557108	0.834	0.791	3.26516e-06
Vegfa	3.70516e-18	0.548005	0.554	0.289	7.62411e-14
Nsa2	8.02972e-28	0.544234	0.868	0.78	1.65228e-23
Egr1	5.58503e-10	0.533792	0.422	0.243	1.14923e-05
Sox9	1.94148e-08	0.528736	0.472	0.309	0.000399498
Thbs1	4.42678e-10	0.526396	0.494	0.309	9.10899e-06
Pgk1	1.41919e-26	0.513005	0.912	0.851	2.92026e-22
Myh9	6.27156e-10	0.510795	0.477	0.28	1.2905e-05
P4ha1	2.51648e-16	0.493939	0.656	0.44	5.17816e-12
Gm11808	2.64255e-26	0.483661	0.852	0.831	5.43758e-22
Myadm	1.52101e-13	0.482574	0.717	0.557	3.12979e-09
Uba52	1.31867e-62	0.475308	0.982	0.983	2.71343e-58
Snhg6	1.4795e-17	0.473415	0.81	0.717	3.04437e-13
Fabp5	8.33691e-13	0.471858	0.881	0.866	1.71549e-08
Rpl13a	8.76231e-22	0.462142	0.848	0.763	1.80302e-17
Soat1	1.5924e-09	0.438512	0.578	0.423	3.27668e-05
Tmem45a	7.45146e-14	0.43744	0.366	0.137	1.53329e-09
Hspa1a	3.6901e-05	0.434698	0.32	0.209	0.759313
Actc1	0.000418183	0.432007	0.481	0.38	1
Klf6	4.33502e-06	0.427208	0.645	0.606	0.0892017
Plod2	1.69828e-09	0.425917	0.664	0.571	3.49456e-05
Hes1	5.67773e-07	0.42487	0.709	0.643	0.0116831
Jun	1.68085e-07	0.420493	0.742	0.694	0.00345869
Ero1l	2.13276e-15	0.41848	0.415	0.169	4.38858e-11
Mif	1.17255e-34	0.409919	0.996	0.989	2.41276e-30
Btg1	1.28391e-08	0.404779	0.711	0.609	0.000264189
Cited2	0.000492746	0.399173	0.554	0.48	1
Atf3	0.0469407	0.398814	0.382	0.337	1
Cox7a2l	2.87387e-14	0.397835	0.83	0.697	5.91356e-10
Ldha	1.01897e-24	0.395032	0.956	0.951	2.09674e-20
Igfbp5	1.06971e-06	0.381913	0.576	0.417	0.0220115
Ktn1	3.44024e-09	0.380372	0.664	0.546	7.07899e-05
Vcan	9.51883e-10	0.37235	0.336	0.151	1.95869e-05
Fos	0.000425452	0.371395	0.638	0.6	1
Pam	9.94196e-07	0.370492	0.664	0.54	0.0204576
Prrc2c	1.07371e-06	0.365545	0.585	0.449	0.0220937
Meg3	4.63257e-06	0.360809	0.706	0.617	0.0953245
Hspa1b	9.96693e-11	0.359928	0.256	0.083	2.0509e-06
Ccl2	0.000794873	0.358885	0.179	0.1	1
Irs2	1.23128e-07	0.357966	0.444	0.28	0.00253361
Fxr1	6.23264e-08	0.357854	0.603	0.491	0.00128249
Lmo4	5.8235e-08	0.357368	0.744	0.7	0.0011983
Fermt2	1.33568e-07	0.355514	0.687	0.574	0.00274844
Rack1	7.20616e-27	0.355154	0.967	0.946	1.48281e-22
Arid5b	5.35093e-06	0.349661	0.457	0.331	0.110106
Nexn	1.08537e-05	0.345602	0.291	0.166	0.223336
Vim	2.28283e-10	0.345176	0.921	0.929	4.69738e-06
Grcc10	1.34267e-07	0.344065	0.64	0.511	0.00276282
Gapdh	3.20652e-28	0.342178	0.996	0.997	6.59807e-24
Eif2s3y	5.8142e-20	0.342165	0.212	0	1.19639e-15
Nme2	3.44165e-10	0.339528	0.768	0.714	7.08187e-06
Ctgf	0.0209247	0.337206	0.506	0.454	1
Gm26532	0.00186655	0.331981	0.426	0.351	1
Zeb2	5.77927e-10	0.33165	0.313	0.134	1.1892e-05
Rbms1	2.14008e-06	0.330305	0.572	0.437	0.0440364
Hspb1	0.337409	0.32731	0.755	0.771	1
Eef1a1	3.00692e-40	0.326431	1	0.994	6.18734e-36
Bnip3l	1.02751e-07	0.32293	0.702	0.626	0.00211431
Gpc3	8.80908e-05	0.321735	0.927	0.891	1
Prelid2	7.83256e-10	0.320978	0.488	0.291	1.61171e-05
mt-Co1	2.11012e-16	0.320082	0.993	0.974	4.34199e-12
Itgb1	4.33782e-07	0.319428	0.744	0.703	0.00892593
Ankrd1	0.135513	0.319094	0.225	0.186	1
Bsg	1.93285e-13	0.318602	0.947	0.951	3.97723e-09
Eno1	2.17869e-11	0.314805	0.896	0.894	4.4831e-07
Dync1i2	1.56794e-07	0.311262	0.678	0.589	0.00322635
Skil	0.0011969	0.31113	0.607	0.529	1
Vcl	8.51382e-07	0.310766	0.342	0.203	0.0175189
Ogdhl	1.87807e-06	0.310272	0.124	0.031	0.038645
Ahnak	2.28594e-07	0.310209	0.424	0.26	0.00470378
Mbnl2	2.56769e-05	0.308322	0.386	0.26	0.528354
Col6a1	3.73594e-07	0.306685	0.32	0.174	0.00768744
Col4a1	2.29034e-05	0.305589	0.55	0.417	0.471284
Ddx3y	1.30702e-20	0.302397	0.219	0	2.68945e-16
Loxl2	6.56064e-08	0.30228	0.581	0.446	0.00134998
Rock2	4.55227e-07	0.300645	0.375	0.226	0.00936721
Gpi1	3.19491e-06	0.299009	0.722	0.651	0.0657417
Slc2a3	3.32001e-13	0.296921	0.241	0.051	6.83159e-09
Gm26735	8.48293e-06	0.294836	0.558	0.431	0.174553
Slc38a2	6.093e-06	0.294388	0.726	0.666	0.125376
Rbpj	1.46246e-06	0.292505	0.351	0.2	0.030093
Cux1	0.000805635	0.287346	0.371	0.28	1
Nrep	0.000637041	0.284906	0.525	0.437	1
Sat1	0.000518958	0.283575	0.338	0.231	1
Nid1	3.25935e-07	0.28297	0.415	0.243	0.00670676
Ttc3	0.000176592	0.281459	0.534	0.423	1
Ccnd2	0.000239555	0.281283	0.656	0.62	1
Zfp36l1	0.000560782	0.281229	0.662	0.617	1
Aplp1	0.00439735	0.279779	0.481	0.403	1
Col6a2	1.09458e-07	0.279521	0.309	0.154	0.00225231
Cox4i2	3.50833e-11	0.279321	0.192	0.037	7.21909e-07
Hnrnpul1	0.00316225	0.276219	0.316	0.229	1
Supt16	0.000875963	0.275659	0.422	0.329	1
Tpr	0.00146307	0.272498	0.539	0.451	1
Pdk1	1.75697e-06	0.271608	0.269	0.131	0.0361532
P4ha2	4.2236e-08	0.269252	0.36	0.191	0.000869091
Egln1	3.97324e-09	0.268497	0.539	0.346	8.17574e-05
Rps28	4.56467e-31	0.261743	0.996	1	9.39272e-27
Col1a1	1.10338e-06	0.259075	0.865	0.769	0.0227042
Igsf3	5.59727e-05	0.258805	0.322	0.203	1
Cyr61	0.00323468	0.258423	0.536	0.483	1
Krt19	5.29908e-06	0.257692	0.371	0.223	0.109039
Bach1	3.85598e-07	0.25751	0.347	0.186	0.00793446
Nfkbia	0.0162445	0.254785	0.329	0.271	1
Mical2	1.41887e-06	0.253307	0.384	0.234	0.0291961
Zfp106	2.73363e-06	0.252775	0.349	0.206	0.0562499
Igfbp2	0.000199067	0.252257	0.199	0.106	1
Lamc1	1.20749e-06	0.2509	0.344	0.191	0.0248465
Etfb	7.92228e-08	-0.250032	0.512	0.671	0.00163017
Fkbp8	2.45903e-07	-0.251866	0.214	0.357	0.00505996
Uba2	7.73644e-07	-0.253026	0.386	0.523	0.0159193
Strap	5.22724e-07	-0.253547	0.437	0.574	0.0107561
Iscu	2.21894e-09	-0.25507	0.283	0.463	4.56592e-05
Tma7	1.2937e-09	-0.257245	0.781	0.926	2.66205e-05
Dnajc9	1.31646e-09	-0.258045	0.216	0.406	2.70888e-05
Vcp	5.34591e-09	-0.258144	0.481	0.64	0.000110003
Dpm2	3.03267e-07	-0.258816	0.245	0.394	0.00624032
Uqcrb	1.3304e-12	-0.258887	0.907	0.954	2.73756e-08
Tipin	7.9369e-07	-0.259375	0.404	0.54	0.0163318
Psmd14	3.24182e-09	-0.259415	0.3	0.477	6.67069e-05
Pomp	2.28528e-07	-0.26078	0.62	0.746	0.00470243
Sae1	3.12999e-05	-0.261441	0.331	0.457	0.644059
Sumo2	5.18764e-20	-0.261464	0.951	0.986	1.06746e-15
Nenf	3.12195e-09	-0.263854	0.642	0.786	6.42404e-05
Mrpl34	2.00023e-08	-0.264656	0.576	0.731	0.000411588
H2afv	1.30934e-10	-0.265033	0.823	0.94	2.69424e-06
Sec61b	1.34113e-13	-0.265239	0.909	0.977	2.75964e-09
Guk1	1.74859e-08	-0.265715	0.408	0.591	0.000359807
Stub1	4.50125e-11	-0.266498	0.49	0.691	9.26223e-07
Snrpc	1.11318e-07	-0.266503	0.581	0.711	0.00229059
Rbx1	1.69185e-10	-0.266998	0.837	0.931	3.48132e-06
Nudcd2	1.58241e-10	-0.267519	0.411	0.6	3.25612e-06
Eny2	3.16519e-10	-0.268409	0.7	0.831	6.51301e-06
Ndufb8	1.96254e-10	-0.268585	0.691	0.826	4.03831e-06
Snrpa1	4.41406e-08	-0.268587	0.419	0.589	0.000908281
U2af1	6.1186e-07	-0.269162	0.731	0.829	0.0125902
mt-Co3	1.1607e-10	-0.270196	0.998	0.994	2.38837e-06
Tmem165	7.84288e-09	-0.270693	0.344	0.523	0.000161383
Rpa3	4.36597e-10	-0.270795	0.468	0.663	8.98387e-06
Alad	1.59994e-08	-0.271293	0.256	0.42	0.000329219
Mrps24	1.58559e-09	-0.272508	0.587	0.757	3.26266e-05
Fis1	3.47775e-10	-0.273655	0.717	0.866	7.15616e-06
Park7	4.31238e-11	-0.274221	0.667	0.814	8.87359e-07
Tmem128	9.37104e-10	-0.275901	0.336	0.517	1.92828e-05
Psmb5	1.87724e-08	-0.276836	0.64	0.771	0.000386281
Glo1	1.13097e-11	-0.278246	0.523	0.711	2.32719e-07
Lsm3	5.04078e-06	-0.280069	0.446	0.571	0.103724
Hint1	3.26063e-15	-0.280902	0.89	0.963	6.70939e-11
Tprgl	4.56243e-06	-0.281226	0.263	0.391	0.093881
Ndufa5	3.92503e-09	-0.283851	0.64	0.78	8.07654e-05
Tmed2	6.07968e-12	-0.283888	0.748	0.866	1.25102e-07
Edf1	5.62588e-12	-0.283917	0.669	0.814	1.15764e-07
Uqcr11	1.04817e-10	-0.284195	0.817	0.914	2.15682e-06
Birc5	3.13516e-05	-0.284661	0.325	0.463	0.645121
Cd81	5.23688e-14	-0.285511	0.898	0.963	1.07759e-09
Polr2f	3.26822e-09	-0.28765	0.664	0.791	6.72501e-05
Calm1	6.11277e-14	-0.288825	0.892	0.946	1.25782e-09
Sdhb	3.4119e-09	-0.289217	0.57	0.72	7.02067e-05
Elavl1	9.1806e-12	-0.290468	0.464	0.651	1.88909e-07
Upk3b	1.12549e-07	-0.291358	0.585	0.731	0.00231592
Psmc5	3.43482e-11	-0.29249	0.305	0.511	7.06782e-07
Gtf2h5	6.98749e-10	-0.294293	0.682	0.823	1.43782e-05
Ndn	4.58722e-09	-0.296609	0.318	0.494	9.43912e-05
Hspa8	3.25189e-17	-0.298105	0.914	0.974	6.69142e-13
Lmnb1	3.43434e-09	-0.298306	0.519	0.677	7.06684e-05
Serf2	2.21496e-30	-0.300177	0.98	0.994	4.55773e-26
Dtymk	2.99613e-09	-0.301308	0.605	0.743	6.16513e-05
Srsf7	4.4607e-08	-0.302346	0.435	0.586	0.000917878
Uqcc2	1.34539e-08	-0.303706	0.636	0.786	0.000276841
Lsm4	9.14477e-13	-0.30414	0.627	0.794	1.88172e-08
Gps1	1.13476e-09	-0.305724	0.238	0.406	2.335e-05
Elob	1.01474e-21	-0.306134	0.934	0.986	2.08803e-17
Rexo2	8.54432e-12	-0.30717	0.225	0.431	1.75817e-07
Dynll1	1.17048e-12	-0.30742	0.907	0.991	2.4085e-08
Lsm2	9.09554e-08	-0.307691	0.532	0.674	0.00187159
Hmgb1	4.39586e-13	-0.308406	0.943	0.986	9.04535e-09
Gmnn	2.85279e-08	-0.308586	0.327	0.509	0.000587019
Atpif1	9.31912e-17	-0.309066	0.932	0.983	1.9176e-12
Ndufs5	4.61073e-14	-0.309739	0.629	0.809	9.48749e-10
Pmp22	6.73339e-09	-0.312087	0.552	0.717	0.000138553
Calr	9.83566e-12	-0.31301	0.547	0.754	2.02388e-07
Ywhaq	1.25283e-15	-0.313174	0.735	0.889	2.57795e-11
Taf10	1.38738e-11	-0.313207	0.598	0.777	2.85481e-07
Nnat	3.73264e-07	-0.317864	0.395	0.537	0.00768064
Nme1	7.00736e-12	-0.319832	0.731	0.849	1.44191e-07
Mrpl36	1.84847e-09	-0.320478	0.36	0.537	3.8036e-05
Eif5a	4.77406e-14	-0.32113	0.843	0.917	9.82358e-10
Mrpl20	7.60542e-12	-0.322105	0.576	0.729	1.56497e-07
Ran	1.42042e-15	-0.328336	0.918	0.966	2.9228e-11
Cycs	8.99494e-10	-0.328577	0.77	0.849	1.85089e-05
Tsen34	1.55583e-10	-0.328904	0.313	0.509	3.20143e-06
1810037I17Rik	6.04241e-14	-0.33261	0.806	0.917	1.24335e-09
Ranbp1	7.96412e-14	-0.33423	0.806	0.92	1.63878e-09
Txndc5	2.03655e-11	-0.334312	0.422	0.629	4.19061e-07
Tsix	2.87436e-31	-0.335083	0	0.266	5.91458e-27
Krt7	2.04411e-07	-0.33658	0.23	0.386	0.00420617
Vdac3	1.64084e-13	-0.337104	0.623	0.789	3.37635e-09
Erp29	2.25702e-10	-0.337309	0.446	0.623	4.64428e-06
Hmgb2	4.44576e-05	-0.337452	0.713	0.811	0.914805
Mtch1	2.92757e-12	-0.337967	0.572	0.743	6.02406e-08
Sf3b5	6.31045e-14	-0.339377	0.726	0.866	1.2985e-09
Ndufa11	6.03722e-15	-0.342752	0.634	0.806	1.24228e-10
Dnajb11	1.85366e-14	-0.343606	0.161	0.389	3.81427e-10
Smdt1	7.99365e-16	-0.347592	0.731	0.866	1.64485e-11
Sf3b6	8.67878e-14	-0.348687	0.642	0.806	1.78583e-09
Hnrnpf	2.24389e-17	-0.348752	0.728	0.883	4.61724e-13
Ppa1	1.42644e-12	-0.349079	0.252	0.46	2.93519e-08
Serp1	1.92696e-12	-0.350026	0.486	0.674	3.96511e-08
mt-Nd3	3.15066e-18	-0.354499	0.947	0.951	6.48312e-14
mt-Cytb	1.14676e-16	-0.354793	0.996	0.991	2.35969e-12
Tbcb	2.65751e-12	-0.358271	0.442	0.64	5.46836e-08
Psmb3	2.17924e-13	-0.361176	0.66	0.814	4.48422e-09
Cox5a	4.04173e-16	-0.366237	0.817	0.926	8.31667e-12
Smim1	1.72761e-06	-0.366485	0.525	0.66	0.0355491
Lsm6	2.90211e-15	-0.372704	0.603	0.791	5.97167e-11
Hnrnpa2b1	4.68934e-19	-0.373263	0.795	0.929	9.64926e-15
Bex2	1.39364e-10	-0.378046	0.558	0.754	2.8677e-06
Srsf3	9.16696e-15	-0.384722	0.678	0.84	1.88629e-10
mt-Nd1	4.21286e-16	-0.38551	0.971	0.971	8.6688e-12
Pclaf	6.09159e-08	-0.387446	0.349	0.529	0.00125347
Atp5g1	6.1424e-18	-0.387905	0.83	0.94	1.26392e-13
Nedd8	3.58983e-23	-0.399322	0.784	0.946	7.38679e-19
Gm10076	7.744e-25	-0.401771	0.865	0.951	1.59348e-20
Rbm3	4.83656e-19	-0.403432	0.799	0.911	9.95218e-15
Oaz1	3.88546e-28	-0.406586	0.901	0.983	7.99511e-24
Arf5	4.90162e-24	-0.411286	0.792	0.92	1.00861e-19
Uqcrq	9.76385e-21	-0.427791	0.735	0.894	2.00911e-16
Tmem14c	9.66676e-22	-0.427815	0.532	0.786	1.98913e-17
Ppp1r14b	3.50935e-16	-0.431909	0.693	0.82	7.22119e-12
Srsf2	4.47735e-15	-0.434173	0.466	0.68	9.21304e-11
Pdia6	7.39254e-20	-0.437116	0.629	0.829	1.52116e-15
mt-Atp6	9.67664e-20	-0.439525	0.996	0.994	1.99116e-15
Cirbp	4.71967e-21	-0.454402	0.402	0.683	9.71166e-17
Prdx1	1.68851e-30	-0.459289	0.887	0.969	3.47445e-26
Alyref	8.73335e-21	-0.465715	0.649	0.831	1.79706e-16
H2afz	9.36477e-18	-0.489252	0.947	0.997	1.92699e-13
Rrm2	8.06507e-12	-0.490407	0.141	0.331	1.65955e-07
Ndufa4	2.60728e-39	-0.49849	0.929	0.977	5.365e-35
Manf	7.55372e-18	-0.501295	0.583	0.766	1.55433e-13
Hspa5	6.82177e-21	-0.524739	0.623	0.809	1.40372e-16
Cdkn1c	7.18716e-12	-0.52923	0.781	0.874	1.4789e-07
Tnni1	4.39696e-27	-0.649773	0.468	0.766	9.04763e-23
Xist	4.63956e-101	-1.40793	0	0.723	9.54683e-97

## Sheet: c6
gene	p_val	avg_logFC	pct.1	pct.2	p_val_adj
Malat1	3.01522e-79	1.02422	0.997	0.998	6.20443e-75
Gm42418	1.39105e-16	0.829016	0.434	0.189	2.86236e-12
Hk2	2.84374e-28	0.751593	0.835	0.747	5.85157e-24
Ktn1	2.277e-26	0.580045	0.808	0.719	4.68537e-22
Uba52	1.02922e-66	0.537291	0.984	0.986	2.11783e-62
Actb	2.09218e-17	0.526892	0.995	0.986	4.30508e-13
Ttn	2.49333e-12	0.512825	0.832	0.896	5.13052e-08
Nrk	5.50927e-10	0.511229	0.459	0.279	1.13364e-05
Gm11808	2.98442e-26	0.508044	0.843	0.868	6.14103e-22
Apoe	2.85605e-09	0.506417	0.698	0.582	5.87689e-05
Pam	2.41319e-10	0.500046	0.92	0.903	4.96562e-06
Col1a2	8.7694e-10	0.487196	0.657	0.487	1.80448e-05
Nexn	3.2251e-21	0.472579	0.926	0.943	6.63629e-17
Cox8b	4.03745e-05	0.452883	0.516	0.485	0.830787
Igf2r	2.61559e-17	0.449869	0.937	0.943	5.38211e-13
Slc38a2	2.07669e-12	0.439774	0.821	0.837	4.2732e-08
Rpl13a	2.07844e-11	0.437219	0.799	0.804	4.27681e-07
Eif2s3y	5.55587e-38	0.432993	0.335	0	1.14323e-33
Bmp4	8.91608e-11	0.419978	0.788	0.655	1.83466e-06
Col1a1	0.0148357	0.415271	0.255	0.199	1
Myadm	8.29179e-08	0.414851	0.72	0.697	0.0017062
Nsa2	2.41239e-17	0.409751	0.863	0.863	4.96397e-13
Actg1	1.38659e-17	0.395797	0.967	0.988	2.85318e-13
Vcan	2.5734e-05	0.392928	0.635	0.586	0.529529
Wwp1	1.21556e-11	0.390882	0.431	0.243	2.50126e-07
Nfia	0.0212591	0.389568	0.453	0.421	1
Meg3	1.74226e-08	0.388651	0.736	0.7	0.000358504
Gpc3	2.81692e-11	0.384713	0.934	0.929	5.79637e-07
Epb41l4aos	4.71335e-09	0.377189	0.533	0.397	9.69865e-05
Mef2a	7.68491e-12	0.376549	0.668	0.551	1.58132e-07
Cited2	1.02486e-05	0.374338	0.745	0.768	0.210886
Bnip3	2.48466e-14	0.37031	0.915	0.884	5.11269e-10
Vegfa	3.8804e-08	0.369579	0.585	0.478	0.000798471
Prss23	7.08134e-07	0.367451	0.335	0.199	0.0145713
Rgs5	0.193594	0.363134	0.143	0.118	1
Gm26532	0.596437	0.356406	0.42	0.513	1
Ncam1	0.000630234	0.355793	0.607	0.57	1
Eif4a2	2.85948e-08	0.352344	0.764	0.749	0.000588395
Srrm1	1.4423e-08	0.347136	0.665	0.546	0.000296783
Rbm24	9.04305e-07	0.345616	0.734	0.721	0.0186079
Marcks	5.74618e-08	0.344276	0.775	0.749	0.00118239
Lmo7	7.59941e-06	0.343169	0.673	0.66	0.156373
Fxr1	1.29769e-08	0.339537	0.72	0.66	0.000267026
Ddx3y	6.75685e-32	0.338246	0.286	0	1.39036e-27
Hes1	0.00135873	0.330315	0.659	0.707	1
Grcc10	1.33091e-08	0.328138	0.728	0.704	0.000273861
Fam198b	2.7711e-05	0.326222	0.486	0.402	0.57021
Rack1	3.57045e-20	0.323193	0.953	0.976	7.34692e-16
Prpf4b	4.68641e-08	0.321319	0.56	0.428	0.000964323
C530008M17Rik	0.000216512	0.313826	0.475	0.416	1
Son	8.32733e-09	0.309948	0.775	0.783	0.000171351
Ttc3	1.21383e-06	0.307866	0.624	0.586	0.0249769
Btg1	4.0971e-05	0.305509	0.75	0.768	0.843059
Lmo4	6.48157e-06	0.301993	0.618	0.544	0.133371
Prrc2c	1.79738e-05	0.293605	0.585	0.527	0.369847
Dsp	3.70018e-05	0.292057	0.701	0.678	0.761387
Col3a1	0.00151348	0.291847	0.297	0.208	1
Snhg6	1.04705e-06	0.291474	0.802	0.844	0.0215451
Eef1a1	5.1235e-27	0.291437	0.992	1	1.05426e-22
Phpt1	3.60554e-08	0.291152	0.723	0.721	0.000741911
Pkn2	2.6435e-05	0.290397	0.582	0.534	0.543953
Wnt5a	0.00031702	0.289827	0.497	0.428	1
Gng11	0.000249303	0.288768	0.786	0.799	1
Ero1l	0.00137384	0.287648	0.47	0.421	1
Man1a2	0.000301495	0.286316	0.365	0.267	1
Zscan26	0.000352186	0.2861	0.379	0.286	1
Kdm6b	7.81762e-06	0.285684	0.574	0.482	0.160863
Ivns1abp	0.0328979	0.284611	0.566	0.631	1
Vim	0.000141925	0.283675	0.918	0.96	1
Afdn	1.0335e-06	0.282552	0.618	0.548	0.0212664
Yme1l1	0.00320411	0.282269	0.495	0.449	1
Nebl	0.000223039	0.28156	0.712	0.773	1
Rps27	1.77989e-20	0.279703	0.992	1	3.66248e-16
Soat1	3.40934e-06	0.279584	0.299	0.17	0.070154
Actn4	6.6408e-05	0.279309	0.516	0.459	1
Zcchc11	7.07516e-05	0.279267	0.473	0.383	1
Zc3h15	0.000119305	0.278718	0.75	0.764	1
Fermt2	3.99969e-06	0.276433	0.813	0.884	0.0823015
Plod2	0.000394604	0.27636	0.626	0.619	1
P4ha1	3.89757e-05	0.274509	0.53	0.466	0.802003
Rrbp1	4.55596e-05	0.272282	0.412	0.296	0.93748
Atp6v0b	3.0147e-07	0.271611	0.805	0.879	0.00620334
Rdx	0.000254127	0.268521	0.739	0.745	1
Sorbs2	4.61533e-05	0.268301	0.86	0.894	0.949696
Igfbp5	0.29201	0.266376	0.637	0.676	1
Csnk2a1	1.66418e-07	0.264649	0.533	0.418	0.00342438
Cbx5	0.000406695	0.263986	0.613	0.605	1
Rps28	1.57518e-18	0.262017	0.995	1	3.24125e-14
Tgfbi	0.000581874	0.261669	0.412	0.314	1
Nfib	0.000345066	0.261074	0.725	0.707	1
Kcnq1ot1	4.43227e-06	0.260537	0.558	0.461	0.0912028
Rps26	6.42837e-20	0.257856	0.997	1	1.32277e-15
Reep3	0.000151262	0.256369	0.467	0.383	1
Cadm1	1.20947e-05	0.253013	0.313	0.196	0.248873
Serbp1	3.75925e-09	0.25276	0.912	0.957	7.7354e-05
Smap1	0.000186575	0.251553	0.459	0.378	1
Crabp1	0.167089	0.251266	0.418	0.407	1
Zfp608	1.20445e-05	0.250868	0.269	0.156	0.24784
Tubb2a	1.90617e-08	-0.250255	0.321	0.518	0.000392233
Igfbp7	2.19342e-06	-0.251094	0.305	0.492	0.045134
Cks1b	5.88729e-10	-0.251557	0.5	0.726	1.21143e-05
Calr	4.48442e-12	-0.258025	0.47	0.733	9.22759e-08
Bola1	1.90949e-16	-0.258512	0.253	0.544	3.92917e-12
Dnajb11	2.30448e-14	-0.258581	0.316	0.591	4.74192e-10
Maged2	5.08906e-15	-0.260068	0.338	0.617	1.04718e-10
Fkbp1a	7.61844e-16	-0.260742	0.871	0.976	1.56765e-11
Uchl3	4.63142e-15	-0.262108	0.44	0.719	9.53007e-11
Pdlim7	3.4457e-12	-0.262624	0.728	0.92	7.09023e-08
Tnnc1	1.9564e-13	-0.262796	0.945	0.998	4.02569e-09
Pttg1	9.86509e-16	-0.263052	0.445	0.742	2.02994e-11
Smdt1	1.34535e-16	-0.264141	0.865	0.969	2.76832e-12
Tubb5	1.06549e-07	-0.264938	0.918	0.967	0.00219245
Rasl11b	3.78069e-12	-0.264979	0.393	0.652	7.77953e-08
Ier3	1.76799e-09	-0.265296	0.481	0.704	3.63799e-05
Ndufb2	1.34302e-14	-0.266499	0.852	0.974	2.76353e-10
Josd2	2.22534e-15	-0.266967	0.434	0.719	4.57907e-11
Psmb3	3.3663e-17	-0.267907	0.813	0.967	6.92684e-13
Hmgb3	8.03582e-10	-0.26838	0.352	0.577	1.65353e-05
Cst3	2.64952e-11	-0.268991	0.973	0.993	5.45191e-07
Uqcrq	1.45578e-15	-0.27066	0.934	0.995	2.99557e-11
Srsf3	1.84282e-11	-0.271682	0.712	0.877	3.79197e-07
Gtf2a2	3.75649e-16	-0.273716	0.659	0.896	7.72973e-12
Arl6ip1	1.51913e-05	-0.273961	0.385	0.541	0.312591
Ywhah	3.01511e-16	-0.275388	0.657	0.879	6.2042e-12
Crip1	3.92841e-08	-0.279474	0.736	0.898	0.000808349
Ppp1r14b	1.57166e-16	-0.280804	0.629	0.894	3.23402e-12
Hspa8	7.95126e-16	-0.282612	0.945	0.998	1.63613e-11
Dctpp1	2.51833e-14	-0.284629	0.363	0.61	5.18197e-10
Apobec2	2.8132e-14	-0.286245	0.473	0.749	5.78872e-10
Ccnb2	3.69305e-11	-0.286371	0.096	0.284	7.59918e-07
Hmgn3	4.14494e-15	-0.290432	0.217	0.499	8.52904e-11
Hnrnpf	2.55758e-14	-0.29264	0.788	0.946	5.26272e-10
Tbca	3.72391e-18	-0.295514	0.923	0.995	7.66269e-14
Actr3	1.15615e-15	-0.296039	0.684	0.898	2.37901e-11
Lsm4	6.3659e-17	-0.297297	0.75	0.931	1.30991e-12
Sln	1.43723e-08	-0.301816	0.049	0.184	0.00029574
Lsm6	1.26404e-15	-0.302316	0.676	0.891	2.60101e-11
Lsm2	1.75435e-10	-0.302653	0.456	0.671	3.60992e-06
Mrpl36	3.72404e-15	-0.303895	0.558	0.818	7.66296e-11
Tsc22d1	1.11243e-13	-0.30408	0.717	0.903	2.28904e-09
Tsc22d3	6.14214e-22	-0.305855	0.264	0.612	1.26387e-17
Mrfap1	8.7974e-23	-0.306016	0.736	0.927	1.81024e-18
mt-Nd1	1.88493e-33	-0.307636	0.997	1	3.87861e-29
Myl3	1.61832e-12	-0.309712	0.898	0.931	3.33001e-08
Ran	7.22855e-18	-0.312514	0.89	0.988	1.48742e-13
Stmn1	8.61953e-13	-0.314474	0.591	0.787	1.77364e-08
H2afv	5.29452e-12	-0.320409	0.832	0.96	1.08945e-07
Cnn1	1.52112e-11	-0.323217	0.577	0.801	3.13001e-07
Adk	2.30224e-19	-0.324008	0.475	0.768	4.73732e-15
Pdia6	4.73001e-17	-0.32616	0.577	0.861	9.73294e-13
Tsix	6.11102e-38	-0.326639	0	0.371	1.25746e-33
Hspa5	3.44265e-15	-0.33002	0.668	0.901	7.08395e-11
Otud1	2.69168e-17	-0.333821	0.22	0.508	5.53867e-13
Myl4	1.42907e-11	-0.337505	0.841	0.91	2.94059e-07
Pdlim3	3.39458e-10	-0.337897	0.429	0.676	6.98502e-06
Sfrp1	2.11964e-08	-0.340141	0.745	0.877	0.000436159
Atox1	7.19743e-20	-0.344368	0.799	0.967	1.48102e-15
Hmgb1	1.8896e-12	-0.349813	0.896	0.993	3.88823e-08
Cdk1	2.10977e-09	-0.350629	0.154	0.34	4.34127e-05
Acta1	1.69173e-07	-0.35172	0.28	0.473	0.00348108
Nme1	7.80581e-20	-0.352622	0.536	0.837	1.6062e-15
Nid2	4.26554e-20	-0.353663	0.354	0.674	8.7772e-16
Clu	3.20099e-06	-0.3544	0.566	0.766	0.0658667
mt-Co2	1.04882e-37	-0.354594	1	1	2.15815e-33
mt-Atp6	3.32923e-48	-0.35749	0.995	1	6.85056e-44
Ckm	1.94471e-12	-0.359385	0.019	0.173	4.00163e-08
Prdx1	3.353e-30	-0.369355	0.904	0.998	6.89948e-26
Ramp1	2.04877e-21	-0.372083	0.17	0.487	4.21576e-17
H2afz	4.76464e-08	-0.380159	0.967	0.993	0.000980419
Trdn	3.22573e-19	-0.384285	0.327	0.638	6.63758e-15
Birc5	5.25349e-08	-0.386775	0.165	0.329	0.00108101
Cenpw	1.10078e-10	-0.389075	0.42	0.631	2.26508e-06
Crip2	4.58956e-19	-0.39122	0.876	0.967	9.44394e-15
5430431A17Rik	4.18086e-12	-0.397014	0.777	0.924	8.60296e-08
Alyref	1.27078e-18	-0.397118	0.566	0.832	2.61489e-14
Cks2	7.702e-05	-0.405709	0.434	0.556	1
Ctgf	1.621e-13	-0.421709	0.464	0.707	3.33553e-09
Cenpa	5.0289e-08	-0.430451	0.217	0.381	0.0010348
Hmgb2	1.14224e-05	-0.436073	0.626	0.752	0.235039
Csrp3	6.89266e-14	-0.437269	0.766	0.879	1.4183e-09
Tcap	6.12494e-16	-0.44226	0.36	0.641	1.26033e-11
Cirbp	1.78559e-28	-0.452644	0.558	0.882	3.6742e-24
Gm10076	7.11403e-38	-0.465854	0.819	0.967	1.46385e-33
Jpt1	2.50639e-24	-0.466274	0.624	0.868	5.15739e-20
Tnni1	1.15412e-47	-0.47829	0.942	0.998	2.37483e-43
Pclaf	1.72814e-08	-0.485156	0.173	0.355	0.000355599
Rrm2	3.19744e-09	-0.560116	0.107	0.27	6.57937e-05
Tuba1a	1.10506e-33	-0.607795	0.566	0.903	2.27388e-29
Ube2c	2.30062e-11	-0.695506	0.225	0.444	4.73398e-07
Cox6a2	1.37297e-16	-0.812737	0.56	0.766	2.82517e-12
Myl2	4.17003e-28	-1.06465	0.462	0.761	8.58068e-24
Xist	5.02361e-118	-1.36688	0	0.882	1.03371e-113

## Sheet: c7
gene	p_val	avg_logFC	pct.1	pct.2	p_val_adj
Gm42418	2.17462e-23	1.11606	0.383	0.089	4.47472e-19
Nppb	4.20963e-05	0.702584	0.325	0.205	0.866216
Bsg	7.10458e-10	0.695711	0.513	0.305	1.46191e-05
Nme2	9.1154e-18	0.684617	0.62	0.325	1.87568e-13
Hk2	4.05573e-14	0.59618	0.273	0.074	8.34549e-10
mt-Co1	2.12076e-16	0.577299	0.925	0.682	4.36388e-12
Rpl13a	4.31773e-11	0.552749	0.536	0.309	8.8846e-07
Ankrd1	1.07059e-13	0.548986	0.857	0.651	2.20296e-09
Gm11808	4.64889e-12	0.542723	0.581	0.359	9.56603e-08
Mt1	2.67345e-11	0.54188	0.532	0.298	5.50115e-07
Sars	1.50879e-09	0.524024	0.227	0.076	3.10463e-05
Bnip3	2.21976e-12	0.492698	0.597	0.336	4.56759e-08
Malat1	7.35407e-18	0.488001	0.601	0.257	1.51325e-13
Hsp90aa1	1.83328e-07	0.467806	0.468	0.288	0.00377233
mt-Nd2	8.83309e-12	0.465576	0.851	0.623	1.81759e-07
Oxct1	6.21557e-08	0.463018	0.302	0.142	0.00127898
Serpinh1	7.01902e-07	0.460689	0.221	0.094	0.014443
Nexn	1.71012e-06	0.451335	0.529	0.364	0.0351891
Plp2	1.14938e-05	0.426417	0.237	0.118	0.236508
Actb	1.67263e-05	0.425808	0.597	0.434	0.344178
Fam162a	3.46234e-15	0.424657	0.873	0.706	7.12446e-11
Top2a	7.26049e-06	0.419856	0.175	0.07	0.149399
Atp1b1	7.47917e-06	0.410111	0.208	0.094	0.153899
Nsa2	4.60797e-07	0.39989	0.542	0.357	0.00948181
Slc2a1	1.28917e-05	0.396249	0.11	0.033	0.265273
Uba52	1.58826e-18	0.393068	0.955	0.88	3.26815e-14
Mif	7.78139e-20	0.388899	0.997	0.943	1.60118e-15
Rpl4	3.08059e-07	0.382225	0.669	0.525	0.00633894
Eif2s3y	6.65352e-14	0.380854	0.117	0	1.3691e-09
Cyba	0.00246728	0.375233	0.149	0.083	1
Eif5b	1.81632e-06	0.374109	0.237	0.109	0.0373744
Eif4b	0.000785787	0.369828	0.127	0.059	1
mt-Nd5	2.61455e-08	0.368251	0.341	0.153	0.000537995
Myh6	1.28838e-05	0.358614	0.253	0.129	0.265111
Upp1	5.74714e-07	0.357346	0.127	0.033	0.0118259
Hspd1	2.27116e-07	0.3525	0.672	0.497	0.00467337
Ctsl	4.95947e-05	0.348472	0.133	0.05	1
Kif5b	2.37328e-05	0.338422	0.308	0.176	0.48835
Tuba1b	7.69888e-05	0.337676	0.617	0.486	1
Sfrp1	7.05546e-06	0.334406	0.24	0.113	0.14518
Cox6a1	3.41367e-06	0.331165	0.607	0.434	0.070243
Tomm5	0.000268854	0.329642	0.516	0.373	1
Hsp90b1	0.00380897	0.32884	0.12	0.061	1
Bex1	1.06787e-06	0.32853	0.75	0.584	0.0219735
Hist1h2ap	2.48547e-07	0.328354	0.12	0.026	0.00511436
Gpx3	0.00063002	0.327149	0.269	0.163	1
Ccnd2	0.000128524	0.325412	0.253	0.142	1
Hadha	5.06915e-06	0.319034	0.146	0.05	0.104308
Pgm2	0.000259309	0.3145	0.269	0.159	1
Ehd4	0.000859092	0.313651	0.198	0.111	1
Dync1i2	0.000140885	0.313573	0.218	0.115	1
Rpl5	3.97006e-12	0.309783	0.916	0.858	8.16919e-08
Prelid2	9.90788e-06	0.308848	0.318	0.174	0.203874
Kcne1	8.08027e-05	0.308071	0.211	0.105	1
Rbp1	0.000188098	0.303043	0.104	0.037	1
Ttn	0.00347512	0.302898	0.114	0.057	1
Cnih4	0.0019574	0.300051	0.25	0.161	1
Ppib	3.40264e-05	0.296543	0.325	0.19	0.70016
Ttc3	0.0110145	0.296104	0.114	0.063	1
Ndufa8	8.92175e-06	0.295881	0.64	0.455	0.183583
mt-Nd4l	3.695e-05	0.290118	0.205	0.094	0.76032
Serbp1	4.83569e-05	0.287029	0.662	0.545	0.99504
Hikeshi	2.03217e-05	0.284196	0.351	0.207	0.418159
Tomm20	9.07933e-05	0.284124	0.494	0.344	1
C1qbp	0.000109534	0.283906	0.545	0.39	1
Nebl	0.000161411	0.283803	0.383	0.255	1
Krt19	0.000252567	0.280234	0.136	0.059	1
Zfp106	0.000911371	0.279251	0.12	0.054	1
Rdx	0.000247007	0.279038	0.26	0.148	1
Pcgf5	0.000372284	0.278552	0.195	0.102	1
Dad1	6.39861e-05	0.276478	0.438	0.29	1
Rack1	2.94601e-07	0.274635	0.818	0.684	0.00606201
Higd1a	1.01777e-06	0.274291	0.828	0.678	0.0209427
Itm2a	0.0139881	0.27427	0.117	0.065	1
Eef1a1	4.06698e-13	0.273407	0.977	0.95	8.36863e-09
Snrnp70	0.000228037	0.27259	0.172	0.083	1
Snrpd3	0.000732686	0.272276	0.403	0.281	1
Krt18	0.0215899	0.271794	0.114	0.065	1
Ncl	0.000249026	0.271496	0.292	0.176	1
Ndufa9	1.11792e-05	0.270458	0.295	0.157	0.230034
Apopt1	0.0211925	0.269993	0.182	0.124	1
Actg1	0.0011837	0.269107	0.451	0.329	1
Acta1	5.19992e-05	0.266942	0.558	0.403	1
Hddc3	4.54273e-05	0.26648	0.101	0.031	0.934757
Cltc	0.000238384	0.264125	0.13	0.054	1
Mrpl19	8.82542e-05	0.261179	0.146	0.061	1
Ociad1	0.00642609	0.261077	0.101	0.05	1
Fam60a	0.00213453	0.260725	0.146	0.076	1
Mpc2	8.86699e-05	0.258089	0.607	0.451	1
Nutf2	0.000384051	0.257651	0.156	0.074	1
Sod1	0.000697278	0.256624	0.221	0.126	1
Aldoa	1.21389e-09	0.252957	0.955	0.908	2.49783e-05
Sap18	0.00483447	0.252332	0.399	0.303	1
Eif2s2	0.000137771	0.251772	0.627	0.481	1
B2m	0.00587109	0.250967	0.12	0.063	1
Plgrkt	0.0454958	-0.250292	0.084	0.129	1
Drap1	0.0619147	-0.251798	0.218	0.264	1
Mrps18c	0.205664	-0.252861	0.244	0.266	1
Rab7	0.0900309	-0.253983	0.104	0.142	1
Serf2	9.19386e-08	-0.254756	0.958	0.965	0.00189182
Hmgn3	0.0324601	-0.255182	0.221	0.279	1
Mrpl23	0.0314656	-0.255629	0.438	0.475	1
Tipin	0.425872	-0.257251	0.133	0.146	1
Rap1a	0.106186	-0.257379	0.208	0.246	1
Cox20	0.0715933	-0.257421	0.422	0.442	1
1810058I24Rik	0.0412047	-0.25763	0.539	0.556	1
Idi1	0.0362316	-0.261361	0.081	0.126	1
Ssbp1	0.371903	-0.261531	0.25	0.259	1
Stub1	0.0739856	-0.262565	0.201	0.246	1
Sh3bgr	0.00408794	-0.262731	0.698	0.662	1
Cav3	0.152889	-0.262844	0.091	0.12	1
Tmsb4x	7.57062e-08	-0.264996	0.994	0.989	0.00155781
Ddah2	0.0475377	-0.265903	0.114	0.159	1
Hcfc1r1	0.00281669	-0.265959	0.701	0.699	1
Lsm2	0.14808	-0.266708	0.295	0.325	1
Pdlim3	0.0189847	-0.267107	0.14	0.203	1
Edf1	0.00740765	-0.267383	0.409	0.471	1
Mthfd2l	0.125184	-0.267732	0.075	0.105	1
Map1lc3b	0.0254998	-0.267797	0.289	0.353	1
Hmgb3	0.158092	-0.268522	0.13	0.159	1
Pebp1	0.00595269	-0.268812	0.568	0.601	1
S100a13	0.0855899	-0.269215	0.211	0.253	1
Pfn2	0.00663379	-0.26953	0.055	0.111	1
Cox5b	3.01505e-07	-0.270939	0.903	0.928	0.00620407
Rnf11	0.0169241	-0.272209	0.055	0.102	1
Fitm1	0.0616312	-0.273287	0.208	0.257	1
Cfl2	0.000119219	-0.273373	0.588	0.656	1
Hadh	0.019191	-0.274596	0.188	0.253	1
Calm2	0.0479827	-0.274641	0.364	0.412	1
Fth1	5.64204e-09	-0.274655	0.948	0.972	0.000116096
Rex1bd	0.0548888	-0.275138	0.218	0.264	1
Rab11b	0.0234039	-0.275641	0.133	0.19	1
Cript	0.00811357	-0.277133	0.205	0.281	1
Uqcc2	0.000777164	-0.277531	0.526	0.61	1
Atpif1	1.68781e-08	-0.278772	0.873	0.919	0.0003473
Psma4	0.0590436	-0.280095	0.341	0.379	1
Capns1	0.103472	-0.280351	0.159	0.196	1
Apex1	0.0628331	-0.280427	0.11	0.153	1
Rrm2	0.670838	-0.280577	0.198	0.196	1
Nenf	0.159043	-0.282638	0.214	0.246	1
Mrpl33	0.0205956	-0.283509	0.325	0.386	1
Lsm6	0.00175519	-0.284111	0.445	0.512	1
Oaz1	1.10958e-09	-0.284592	0.828	0.889	2.28318e-05
Ccdc167	0.0167177	-0.285318	0.084	0.139	1
Dynlt3	0.0299718	-0.286101	0.065	0.109	1
Ccnd3	0.0580801	-0.287343	0.234	0.283	1
Rbm3	0.00460768	-0.288157	0.429	0.501	1
Apobec2	0.0319301	-0.288341	0.286	0.336	1
Cavin3	0.3209	-0.28858	0.156	0.174	1
Gnb2	0.107184	-0.289002	0.244	0.279	1
Eid1	0.0459222	-0.293743	0.416	0.444	1
Gtf2h5	0.0333979	-0.293838	0.403	0.431	1
Rnf7	3.14027e-05	-0.294981	0.591	0.678	0.646174
Tbcb	0.0646048	-0.295883	0.279	0.316	1
Psmd7	0.0929237	-0.295912	0.156	0.196	1
Med8	0.206147	-0.297049	0.084	0.109	1
Sumo2	5.94855e-06	-0.299513	0.718	0.78	0.122403
Ndufb2	4.23724e-06	-0.300977	0.666	0.719	0.0871898
Ubl5	0.000427151	-0.301824	0.523	0.588	1
Cdk2ap1	0.0130796	-0.303111	0.136	0.2	1
Mrps36	0.0850582	-0.303331	0.506	0.508	1
Smdt1	0.000452623	-0.303587	0.552	0.595	1
Pcbd1	0.00759092	-0.306218	0.133	0.203	1
Smpx	0.000146657	-0.306372	0.698	0.725	1
Nudt4	0.00471947	-0.306674	0.049	0.105	1
Ppp1cb	0.00627714	-0.308284	0.244	0.325	1
Serf1	0.0190876	-0.308625	0.286	0.349	1
Hsd17b10	0.092623	-0.309833	0.221	0.257	1
Cdc42	0.00801124	-0.310953	0.51	0.549	1
Capza2	0.00932777	-0.311272	0.224	0.292	1
Prdx1	2.86292e-05	-0.313721	0.656	0.732	0.589102
Ptp4a1	0.0295322	-0.316376	0.123	0.176	1
Trappc6a	0.0067663	-0.317063	0.156	0.227	1
Gpx1	0.00678574	-0.323215	0.383	0.434	1
Mrpl14	0.0464452	-0.323823	0.263	0.307	1
Ssna1	0.0471702	-0.323824	0.136	0.183	1
1810037I17Rik	0.00264195	-0.324023	0.406	0.488	1
Csrp2	0.201891	-0.325502	0.666	0.606	1
Eif3e	0.0031057	-0.326946	0.364	0.447	1
Smim1	0.0069019	-0.329177	0.055	0.111	1
Paip2	0.00853849	-0.331667	0.256	0.325	1
Lsm4	0.00616187	-0.332924	0.471	0.492	1
Mtch1	0.00244421	-0.336393	0.221	0.312	1
Sp3os	0.0306959	-0.336649	0.153	0.207	1
Khdrbs3	0.0719794	-0.3376	0.123	0.163	1
Svbp	0.00482992	-0.341823	0.237	0.318	1
Iscu	0.0628549	-0.342644	0.227	0.266	1
Vamp3	0.00440889	-0.345772	0.094	0.161	1
Atcayos	0.00280628	-0.347943	0.172	0.255	1
Crip2	8.43762e-11	-0.361356	0.857	0.893	1.73621e-06
Yeats4	0.0141787	-0.374191	0.162	0.224	1
Hint2	0.0086679	-0.374867	0.14	0.207	1
Prrx2	0.00069009	-0.377653	0.068	0.146	1
Hnrnpf	0.000941652	-0.383426	0.347	0.431	1
Cebpzos	0.00358687	-0.38405	0.143	0.218	1
Josd2	0.000442005	-0.388035	0.179	0.279	1
Cdkn1c	0.000111031	-0.391701	0.5	0.584	1
H2afv	0.000383365	-0.395109	0.468	0.549	1
Mrps18a	0.0174553	-0.406825	0.13	0.185	1
Pclaf	0.019992	-0.434491	0.263	0.312	1
Tsc22d3	0.00156662	-0.452067	0.149	0.233	1
Tnni1	2.71548e-18	-0.467298	0.867	0.908	5.58764e-14
Mgst3	3.70484e-05	-0.470139	0.208	0.331	0.762345
Atox1	2.20089e-07	-0.513257	0.412	0.536	0.00452878
Cited1	0.047478	-0.519227	0.344	0.377	1
Myl1	5.98533e-07	-0.556397	0.12	0.264	0.012316
Tcap	1.04997e-06	-0.595665	0.218	0.364	0.0216053
5430431A17Rik	9.31243e-08	-0.6599	0.299	0.447	0.00191622
Gm10076	3.78165e-14	-0.665256	0.529	0.673	7.7815e-10

## Sheet: c8
gene	p_val	avg_logFC	pct.1	pct.2	p_val_adj
Ldha	2.85899e-35	0.724281	0.925	0.565	5.88295e-31
Aldoa	9.55726e-28	0.629896	0.897	0.542	1.9666e-23
Mif	4.42788e-28	0.626367	0.941	0.642	9.11126e-24
Pgk1	3.64173e-21	0.579844	0.768	0.406	7.49359e-17
Nme2	1.35074e-23	0.560042	0.843	0.487	2.77941e-19
Erh	2.32793e-19	0.527371	0.837	0.528	4.79019e-15
Ctsl	1.5472e-15	0.524488	0.77	0.45	3.18366e-11
Rpl5	8.72631e-34	0.517709	0.969	0.775	1.79561e-29
Tspan6	1.11872e-17	0.514452	0.86	0.594	2.302e-13
Sparcl1	8.88235e-16	0.502958	0.314	0.059	1.82772e-11
Sat1	7.28902e-12	0.501726	0.632	0.339	1.49986e-07
Eef1b2	1.15838e-28	0.469863	0.971	0.764	2.3836e-24
Edn1	1.40618e-10	0.468569	0.594	0.343	2.89349e-06
Fam162a	7.97232e-17	0.449652	0.695	0.358	1.64046e-12
Csrp2	5.56369e-11	0.440131	0.745	0.476	1.14484e-06
Rbp1	9.87313e-14	0.439244	0.868	0.631	2.03159e-09
Npm1	1.11064e-17	0.436472	0.927	0.686	2.28537e-13
Sparc	1.06546e-15	0.42916	0.891	0.594	2.19239e-11
Eif2s2	8.88824e-15	0.421988	0.826	0.487	1.82893e-10
Rps7	3.36117e-35	0.420857	0.998	0.948	6.91629e-31
Spcs1	4.10058e-16	0.419058	0.828	0.498	8.43777e-12
Eno1	1.06542e-17	0.412546	0.632	0.269	2.19232e-13
Rps4x	3.96387e-26	0.403866	1	0.919	8.15645e-22
Rps6	9.81385e-17	0.402254	0.948	0.771	2.0194e-12
Skp1a	2.48904e-14	0.396548	0.724	0.406	5.1217e-10
Itm2b	8.97607e-12	0.394154	0.847	0.583	1.847e-07
Cnbp	1.2101e-12	0.389275	0.797	0.491	2.49003e-08
Cd63	1.04821e-13	0.389223	0.833	0.554	2.15691e-09
Tmem59	4.2199e-11	0.387734	0.68	0.399	8.6833e-07
Grcc10	3.31918e-19	0.383875	0.672	0.292	6.82987e-15
Nrp1	5.31347e-15	0.383309	0.46	0.166	1.09335e-10
Anxa5	1.39852e-12	0.381851	0.695	0.421	2.87773e-08
Rpl36a	1.56244e-25	0.378523	0.996	0.886	3.21502e-21
Pdia3	2.27248e-12	0.377954	0.81	0.506	4.67609e-08
Gm11808	2.81789e-20	0.375606	0.908	0.657	5.79838e-16
Bnip3	5.08743e-14	0.367098	0.264	0.041	1.04684e-09
Acp1	7.49225e-15	0.366659	0.565	0.258	1.54168e-10
Serbp1	1.87083e-15	0.364132	0.885	0.609	3.84961e-11
Tpt1	1.90155e-26	0.360833	0.996	0.941	3.91281e-22
Tm9sf3	6.57898e-12	0.360344	0.586	0.306	1.35376e-07
Myl12a	1.81838e-12	0.357293	0.891	0.649	3.74168e-08
Myct1	2.50534e-12	0.357177	0.54	0.251	5.15524e-08
Pam	4.22565e-12	0.350649	0.669	0.354	8.69511e-08
Rps3a1	6.69266e-21	0.349924	1	0.926	1.37715e-16
Sfr1	8.69977e-12	0.345543	0.785	0.469	1.79015e-07
Rpl10	6.49106e-19	0.345314	0.977	0.875	1.33566e-14
Rpl23a	5.32336e-25	0.342456	0.983	0.919	1.09539e-20
Tm4sf1	1.1277e-09	0.341385	0.523	0.277	2.32047e-05
Nutf2	9.83954e-13	0.339661	0.358	0.114	2.02468e-08
Skil	1.10363e-09	0.33559	0.577	0.317	2.27094e-05
Rpl7	3.6397e-21	0.334814	0.985	0.86	7.4894e-17
Gstp1	1.96593e-12	0.334176	0.341	0.1	4.04529e-08
Snrpa1	1.66813e-10	0.33106	0.49	0.229	3.43251e-06
Cox7a2l	2.39105e-14	0.330847	0.772	0.446	4.92007e-10
Snhg6	2.78499e-14	0.328711	0.851	0.546	5.73067e-10
Rpl30	8.02734e-26	0.328535	0.996	0.963	1.65179e-21
Pgam1	3.55611e-10	0.326997	0.649	0.365	7.31742e-06
Rdx	3.71131e-11	0.325565	0.772	0.491	7.63675e-07
Btf3	7.84479e-13	0.325183	0.954	0.712	1.61422e-08
P4ha1	7.26488e-15	0.320935	0.448	0.159	1.49489e-10
Gpc3	2.2909e-07	0.319112	0.255	0.096	0.00471398
Bst2	3.75062e-14	0.317879	0.427	0.14	7.71764e-10
Hbegf	0.000696705	0.317825	0.22	0.122	1
Nsa2	2.2223e-15	0.317514	0.816	0.52	4.57283e-11
Tpi1	5.10912e-13	0.315909	0.655	0.339	1.0513e-08
Rpl37	3.2185e-32	0.313573	1	0.993	6.6227e-28
Hes1	9.44738e-08	0.313378	0.695	0.454	0.00194399
Cops9	6.06622e-12	0.311384	0.805	0.48	1.24825e-07
Rtraf	5.03535e-11	0.310481	0.833	0.55	1.03612e-06
Ostc	4.38841e-09	0.308268	0.778	0.498	9.03002e-05
Eef1a1	7.5942e-20	0.308111	0.99	0.93	1.56266e-15
Fundc2	1.40233e-11	0.306204	0.728	0.417	2.88558e-07
Fam3c	2.18204e-10	0.304042	0.475	0.225	4.48998e-06
Bsg	6.91269e-12	0.303825	0.885	0.609	1.42242e-07
Hmgb1	8.98279e-10	0.301569	0.935	0.734	1.84839e-05
Tmem100	5.86427e-11	0.301182	0.251	0.055	1.20669e-06
Eif3m	3.70398e-11	0.299735	0.672	0.362	7.62167e-07
Tmed10	2.74639e-10	0.298862	0.676	0.38	5.65124e-06
Nap1l1	3.38305e-10	0.298554	0.831	0.55	6.9613e-06
Sumo1	4.01911e-10	0.298289	0.818	0.483	8.27012e-06
Tmsb4x	6.38099e-15	0.297926	0.996	0.985	1.31302e-10
Rpl6	7.45174e-26	0.297612	0.998	0.97	1.53334e-21
Brk1	3.07593e-10	0.297508	0.584	0.325	6.32935e-06
Uba52	2.77937e-22	0.296758	0.987	0.956	5.71911e-18
Gkn3	4.66475e-06	0.296367	0.215	0.081	0.0959866
Hnrnpa1	2.11109e-07	0.295773	0.906	0.613	0.00434399
Bex3	6.771e-10	0.29377	0.688	0.391	1.39327e-05
Mest	5.40057e-13	0.291656	0.749	0.402	1.11127e-08
Tmem50a	2.37963e-10	0.291244	0.598	0.343	4.89657e-06
Snrpd3	6.48557e-11	0.290872	0.672	0.376	1.33454e-06
H3f3a	1.22204e-12	0.28963	0.971	0.793	2.51458e-08
Rpl13a	4.5275e-13	0.28946	0.826	0.509	9.31624e-09
Actc1	7.00588e-08	0.289252	0.45	0.218	0.0014416
Prdx4	3.80241e-08	0.289194	0.605	0.354	0.000782422
Sec11a	1.25113e-08	0.288945	0.667	0.395	0.000257445
Tagln	0.000365629	0.286051	0.211	0.103	1
Sept7	8.47468e-11	0.285655	0.749	0.428	1.74383e-06
Rack1	3.93157e-14	0.285023	0.962	0.819	8.09e-10
Txn1	1.41085e-08	0.284782	0.845	0.598	0.00029031
Mrpl24	5.58153e-08	0.283922	0.496	0.266	0.00114851
Ube2a	5.07631e-10	0.283587	0.496	0.236	1.04455e-05
Nop10	5.84373e-10	0.283464	0.891	0.653	1.20246e-05
Itgb1	1.71979e-11	0.282547	0.747	0.469	3.5388e-07
Ddx3y	1.15026e-15	0.282189	0.207	0	2.36689e-11
Arl6ip1	3.49294e-05	0.280498	0.404	0.24	0.718742
Plp2	1.59665e-11	0.278663	0.565	0.288	3.28543e-07
Imp3	2.2476e-10	0.278511	0.6	0.328	4.62489e-06
Rps15a	3.25879e-16	0.276304	0.994	0.937	6.7056e-12
Vkorc1	9.78733e-15	0.276166	0.469	0.181	2.01394e-10
Fkbp3	2.51748e-08	0.275725	0.674	0.413	0.000518022
Pfn1	2.75753e-12	0.275194	0.962	0.841	5.67417e-08
Eif2s3y	5.84687e-13	0.272938	0.172	0	1.20311e-08
Rpl12	6.00449e-16	0.272009	0.994	0.926	1.23554e-11
Rpl23	3.72108e-20	0.271648	1	0.963	7.65686e-16
Thoc7	8.79929e-10	0.269897	0.728	0.417	1.81063e-05
Rps3	5.68252e-16	0.269881	0.992	0.923	1.16929e-11
Gapdh	4.25497e-11	0.269556	0.973	0.871	8.75545e-07
Higd1a	8.12537e-08	0.269386	0.764	0.513	0.00167196
Naa38	1.54921e-11	0.268474	0.563	0.266	3.1878e-07
Rps27	4.38211e-16	0.268197	0.992	0.937	9.01707e-12
Mgst1	3.21611e-07	0.267151	0.303	0.133	0.0066178
Eif1b	5.76657e-10	0.265018	0.615	0.347	1.18659e-05
Emcn	3.48709e-06	0.263852	0.274	0.122	0.0717539
Morf4l1	2.69548e-09	0.262132	0.808	0.509	5.54649e-05
Fdx1	2.21074e-11	0.260523	0.395	0.151	4.54904e-07
Polr2d	5.44892e-09	0.259995	0.437	0.21	0.000112122
Hist1h2ae	1.65804e-05	0.259497	0.285	0.14	0.341175
Ndufa6	7.81285e-11	0.259306	0.845	0.542	1.60765e-06
Hotairm1	2.72657e-06	0.2589	0.295	0.133	0.0561046
Ndufc2	2.76348e-09	0.257912	0.78	0.524	5.68641e-05
Rps27a	2.24577e-18	0.257795	1	0.974	4.62112e-14
Hnrnpc	1.97189e-11	0.257539	0.636	0.325	4.05757e-07
Emg1	2.3409e-11	0.256357	0.59	0.292	4.81687e-07
Nars	5.50239e-10	0.255332	0.32	0.114	1.13223e-05
F2r	4.69565e-08	0.25326	0.795	0.502	0.000966223
Gm2000	1.87307e-10	0.252754	0.498	0.229	3.85421e-06
Set	2.33105e-08	0.252567	0.856	0.565	0.00047966
Manf	7.86945e-07	0.251744	0.745	0.494	0.016193
Ccdc50	3.97649e-09	0.251309	0.421	0.192	8.18243e-05
Clns1a	3.39306e-10	0.251205	0.46	0.203	6.9819e-06
Hsp90ab1	1.50499e-12	0.251182	0.992	0.937	3.09682e-08
Adh5	4.32076e-09	0.250916	0.483	0.24	8.89083e-05
Snrpb2	7.82264e-10	0.250823	0.68	0.395	1.60967e-05
Ddah1	4.78712e-08	0.250669	0.383	0.188	0.000985047
Bcap31	5.10313e-10	0.250181	0.374	0.148	1.05007e-05
Rpl10a	5.01818e-13	0.250116	0.994	0.875	1.03259e-08
Btg3	6.31932e-11	0.250013	0.301	0.089	1.30033e-06
Limch1	0.231587	-0.250078	0.331	0.258	1
Park7	0.550953	-0.25009	0.632	0.524	1
Shf	0.0979371	-0.250421	0.096	0.129	1
Trir	0.113438	-0.250824	0.617	0.432	1
Nomo1	0.219566	-0.251193	0.088	0.111	1
Tie1	0.290919	-0.251611	0.439	0.343	1
Ptbp1	0.671748	-0.25236	0.418	0.343	1
Dock4	0.0833374	-0.252657	0.088	0.122	1
Cdc42ep5	0.885347	-0.253181	0.383	0.339	1
Ehd1	0.893747	-0.254199	0.236	0.218	1
Ssbp4	0.13297	-0.254301	0.222	0.251	1
Nfkbiz	0.621476	-0.254328	0.132	0.137	1
Ppp1r12c	0.623953	-0.254857	0.107	0.111	1
Plcg1	0.391161	-0.254902	0.096	0.111	1
Fam129b	0.93632	-0.254906	0.18	0.166	1
Adcy4	0.543784	-0.254931	0.117	0.125	1
Acot7	0.770652	-0.255243	0.163	0.159	1
Sema6a	0.681317	-0.257674	0.224	0.196	1
Myo6	0.564753	-0.257813	0.188	0.192	1
Anapc2	0.393085	-0.258618	0.103	0.118	1
Uqcr10	0.0788753	-0.25931	0.828	0.72	1
Gpx4	0.439449	-0.259458	0.705	0.583	1
Crabp2	0.0107065	-0.261303	0.056	0.103	1
Elp3	0.464956	-0.26134	0.096	0.107	1
Dock6	0.765931	-0.261404	0.18	0.155	1
Arl4a	0.0582165	-0.261702	0.167	0.207	1
mt-Nd3	1.59869e-10	-0.261719	0.969	0.952	3.28962e-06
Bag6	0.550709	-0.26218	0.172	0.177	1
Atf4	0.669659	-0.262432	0.358	0.295	1
Fkbp8	0.794122	-0.262854	0.228	0.214	1
Anxa6	0.181702	-0.265051	0.228	0.251	1
Mbd3	0.345372	-0.266733	0.326	0.317	1
2410002F23Rik	0.643235	-0.267671	0.184	0.159	1
Ssrp1	0.979681	-0.267741	0.31	0.273	1
Grn	0.4029	-0.268352	0.167	0.129	1
Tubb5	0.000855979	-0.26841	0.862	0.804	1
Pdlim4	0.000347541	-0.269076	0.046	0.114	1
Atp5e	5.21229e-06	-0.26918	0.952	0.956	0.107253
Tmem132a	0.151313	-0.269267	0.098	0.125	1
Trpc4ap	0.796012	-0.270184	0.146	0.129	1
Fam173a	0.223584	-0.271329	0.247	0.188	1
Aprt	0.226403	-0.27268	0.73	0.646	1
Mrpl14	0.078693	-0.274013	0.521	0.376	1
Btg1	0.675664	-0.274805	0.757	0.594	1
Gm47283	0.396084	-0.275724	0.351	0.284	1
Tuba1a	0.0482609	-0.275816	0.703	0.627	1
Srsf2	0.958889	-0.277018	0.554	0.443	1
Ier5	0.328256	-0.278384	0.157	0.173	1
Pi16	0.232869	-0.278796	0.155	0.177	1
Akap13	0.427844	-0.279372	0.364	0.339	1
Vars	0.745717	-0.279382	0.1	0.103	1
Clptm1	0.813437	-0.279738	0.132	0.129	1
Trim47	0.655479	-0.281393	0.299	0.247	1
Map2k2	0.158859	-0.283161	0.337	0.339	1
Nr1h2	0.202941	-0.285368	0.084	0.107	1
Alad	0.33772	-0.285392	0.121	0.092	1
Ndufa13	0.477853	-0.285652	0.795	0.668	1
Atp5b	0.446545	-0.287721	0.665	0.542	1
mt-Nd1	3.97978e-18	-0.288443	1	0.993	8.1892e-14
Coro1c	0.801086	-0.291784	0.251	0.232	1
Uqcr11	0.0122588	-0.291879	0.862	0.756	1
Gcn1l1	0.479298	-0.29196	0.096	0.107	1
Luc7l2	0.661329	-0.293111	0.441	0.362	1
Gnb2	0.0621519	-0.294722	0.672	0.579	1
Spon1	0.052935	-0.294877	0.169	0.21	1
Mapk3	0.91097	-0.294942	0.421	0.347	1
Ptprs	0.137922	-0.295171	0.397	0.295	1
D8Ertd738e	0.106273	-0.295261	0.764	0.653	1
Lmna	0.650603	-0.295603	0.308	0.284	1
Dapk3	0.89904	-0.296	0.195	0.173	1
Tubb4b	0.572759	-0.297445	0.268	0.258	1
Cbfa2t3	0.909427	-0.297529	0.222	0.199	1
Galnt18	3.73681e-06	-0.298601	0.027	0.107	0.0768924
Emp3	0.354139	-0.298703	0.628	0.546	1
Ddb1	0.296443	-0.302239	0.408	0.314	1
Tns1	0.331727	-0.302508	0.119	0.137	1
Mmp14	0.26929	-0.302916	0.303	0.303	1
Mknk2	0.598036	-0.303002	0.276	0.232	1
Plcd1	0.0469116	-0.303331	0.067	0.103	1
Uqcrq	7.59068e-05	-0.30419	0.828	0.734	1
Atpif1	0.000243203	-0.304375	0.946	0.878	1
Rgl2	0.287468	-0.304393	0.149	0.166	1
Ddx3x	0.927699	-0.306415	0.328	0.295	1
Sox4	0.00641667	-0.306893	0.81	0.701	1
Fbln2	0.969458	-0.309123	0.544	0.461	1
mt-Nd4l	1.52246e-06	-0.310011	0.895	0.815	0.0313276
Ier2	0.877777	-0.310344	0.674	0.542	1
Plekho1	0.345617	-0.311467	0.209	0.225	1
Rai14	0.452439	-0.311524	0.167	0.173	1
mt-Atp6	4.97379e-24	-0.31219	1	1	1.02346e-19
Jpt1	0.00253534	-0.313522	0.711	0.631	1
Sptan1	0.838017	-0.314667	0.243	0.21	1
Puf60	0.320966	-0.314771	0.301	0.299	1
Agap1	0.137079	-0.315713	0.086	0.114	1
Erp29	0.276634	-0.316636	0.538	0.476	1
Rgs3	0.936353	-0.317688	0.257	0.229	1
Tspan9	0.102799	-0.318345	0.123	0.159	1
Meg3	0.833977	-0.320004	0.504	0.428	1
Igfbp4	0.334196	-0.321158	0.697	0.572	1
Dusp1	0.086215	-0.323924	0.27	0.303	1
Uqcc2	0.197972	-0.325059	0.724	0.613	1
Piezo1	0.212205	-0.325241	0.136	0.159	1
Gnas	7.51426e-06	-0.325917	0.925	0.875	0.154621
Ncor2	0.513308	-0.329351	0.119	0.129	1
Ptprb	0.813762	-0.330821	0.513	0.41	1
Nupr1	0.286808	-0.331579	0.113	0.133	1
P3h3	0.276563	-0.336967	0.224	0.236	1
Jag1	0.103567	-0.337602	0.19	0.229	1
Ccdc124	0.522347	-0.338149	0.397	0.362	1
Hras	0.150932	-0.339758	0.354	0.362	1
Angptl2	0.164258	-0.339893	0.126	0.151	1
Egln2	0.0283987	-0.340284	0.13	0.177	1
Sox18	0.804118	-0.341171	0.23	0.218	1
S100a6	0.0452411	-0.341993	0.508	0.528	1
Capns1	0.243254	-0.343225	0.577	0.498	1
Hdac7	0.29481	-0.343907	0.234	0.177	1
Map1b	0.540144	-0.345905	0.335	0.277	1
Neat1	0.229192	-0.346363	0.142	0.166	1
Tmem259	0.0983854	-0.346877	0.086	0.118	1
Ptov1	0.101016	-0.349702	0.642	0.576	1
Maged1	0.711385	-0.349914	0.531	0.443	1
Prnp	0.21043	-0.350381	0.126	0.148	1
Nucb1	0.446426	-0.351092	0.203	0.207	1
Rhob	0.177377	-0.351903	0.649	0.55	1
Pofut2	0.440902	-0.352776	0.316	0.258	1
Plpp3	0.230518	-0.353413	0.172	0.192	1
Tmem160	0.723956	-0.357108	0.402	0.354	1
Nnat	0.0741358	-0.357731	0.318	0.347	1
Tinagl1	0.442551	-0.359285	0.278	0.269	1
Crip2	6.51101e-07	-0.359886	0.868	0.786	0.0133977
Bmyc	0.182789	-0.361875	0.695	0.616	1
Edf1	0.0003954	-0.361959	0.805	0.727	1
Gm16104	0.638899	-0.362809	0.456	0.395	1
Hyal2	0.874718	-0.363481	0.293	0.266	1
Prkcsh	0.397736	-0.364989	0.291	0.288	1
Emilin1	0.8357	-0.36683	0.456	0.391	1
Tgfb1	0.247698	-0.367195	0.374	0.365	1
Atox1	0.000714548	-0.369762	0.87	0.812	1
Cyp26b1	0.0113492	-0.37016	0.23	0.295	1
Adam15	0.0737717	-0.371882	0.176	0.214	1
Nos3	0.222824	-0.377008	0.199	0.218	1
Adgre5	0.0270504	-0.377126	0.069	0.111	1
Psmb6	0.483962	-0.379281	0.623	0.535	1
Hba-x	0.0336341	-0.380538	0.107	0.151	1
Thbd	0.26449	-0.380776	0.22	0.232	1
Kctd10	0.780427	-0.38187	0.199	0.188	1
Tnnt2	0.991079	-0.382711	0.201	0.185	1
Git1	0.0200585	-0.386687	0.111	0.162	1
2200002D01Rik	0.123007	-0.388563	0.155	0.185	1
Notch1	0.979007	-0.388781	0.427	0.365	1
Jun	0.0548995	-0.389046	0.676	0.605	1
Cdc42bpb	0.153885	-0.389844	0.14	0.17	1
mt-Cytb	2.78916e-26	-0.390874	1	1	5.73925e-22
Slc9a3r2	0.0124172	-0.392609	0.471	0.487	1
Efna1	0.0751853	-0.394738	0.142	0.177	1
Pdlim7	0.540284	-0.395583	0.374	0.339	1
Itga5	0.186908	-0.39839	0.213	0.232	1
Cenpb	0.0827313	-0.399231	0.128	0.162	1
Bmp1	0.514193	-0.400723	0.234	0.225	1
Zfpm1	0.621592	-0.402369	0.259	0.24	1
Txnip	0.756155	-0.404878	0.257	0.236	1
Rasip1	0.411345	-0.408804	0.328	0.314	1
Plxnd1	0.368011	-0.410321	0.341	0.328	1
Pthlh	0.0277474	-0.42744	0.126	0.173	1
Col5a1	0.0331111	-0.42997	0.232	0.277	1
H2-D1	0.0242902	-0.432062	0.262	0.303	1
Fosb	7.30818e-08	-0.438604	0.048	0.162	0.0015038
B930036N10Rik	0.0061064	-0.439855	0.067	0.122	1
Smarca4	0.114577	-0.444785	0.241	0.262	1
Ecm1	0.151419	-0.449202	0.502	0.458	1
Cdkn1c	0.452952	-0.45137	0.603	0.539	1
Malat1	4.58744e-08	-0.452739	0.996	0.996	0.000943958
Ptms	0.0279793	-0.455808	0.561	0.535	1
Phlda3	0.00169461	-0.45924	0.134	0.207	1
Jund	0.000153433	-0.46211	0.718	0.668	1
H2afj	0.00107435	-0.467046	0.73	0.683	1
Adamts5	0.149787	-0.473557	0.077	0.103	1
Sema3f	0.0043008	-0.474626	0.088	0.148	1
Gm10076	6.43862e-14	-0.477124	0.835	0.79	1.32488e-09
Prrc2a	0.200768	-0.480837	0.23	0.24	1
Phlda1	0.506573	-0.481706	0.188	0.192	1
Ebf1	0.202911	-0.484091	0.387	0.376	1
Auts2	0.681583	-0.488752	0.349	0.31	1
Arl4d	0.00101181	-0.501112	0.09	0.162	1
Vcp	0.0552809	-0.504041	0.523	0.483	1
Timm13	0.00026607	-0.509103	0.734	0.683	1
Ctsd	0.0189457	-0.525498	0.324	0.354	1
Klf4	4.09619e-05	-0.52707	0.397	0.472	0.842872
Atf3	0.281651	-0.529381	0.259	0.266	1
Ubc	0.00114644	-0.530807	0.41	0.472	1
Ece1	0.306785	-0.543765	0.385	0.358	1
Tmem108	0.00233084	-0.551634	0.234	0.306	1
Klk8	0.108654	-0.562395	0.446	0.406	1
Tek	0.0147411	-0.574986	0.494	0.476	1
Smad6	0.339738	-0.607144	0.425	0.391	1
Calr	1.98748e-05	-0.61002	0.651	0.646	0.408963
Eng	0.0063957	-0.615315	0.498	0.502	1
Fos	0.000144341	-0.62066	0.299	0.391	1
Plec	0.00114952	-0.632654	0.169	0.247	1
Stmn2	4.63989e-05	-0.652205	0.441	0.513	0.95475
Gm42418	0.0962752	-0.65451	0.569	0.38	1
Heg1	0.000644075	-0.667732	0.251	0.328	1
P4hb	0.00389321	-0.686931	0.663	0.609	1
Crip1	2.5728e-13	-0.702274	0.81	0.838	5.29406e-09
Hspg2	0.00514248	-0.74159	0.582	0.572	1
Arhgdia	2.35431e-08	-0.747071	0.469	0.583	0.000484446
H19	4.61247e-14	-0.785574	0.983	0.989	9.49108e-10
Klf2	2.90429e-16	-0.785672	0.72	0.804	5.97616e-12
Col18a1	1.73123e-12	-0.816641	0.793	0.79	3.56236e-08
Tnni1	3.50283e-08	-0.859521	0.364	0.494	0.000720778
Eln	8.84367e-08	-0.879409	0.423	0.539	0.00181976
Igfbp5	0.00200816	-0.901115	0.192	0.269	1
Igf2	4.74419e-05	-0.903783	0.605	0.601	0.976212
Wnt4	6.65114e-08	-0.913724	0.199	0.343	0.0013686
Ltbp4	5.23101e-07	-0.948623	0.496	0.554	0.0107639
Hbb-y	1.87173e-14	-1.06532	0.257	0.48	3.85146e-10
Tsix	6.11296e-52	-1.15968	0	0.413	1.25786e-47
Xist	3.28247e-127	-2.7139	0	0.867	6.75435e-123
Gm26917	1.82112e-25	-3.20466	0.178	0.491	3.74732e-21

## Sheet: c9
gene	p_val	avg_logFC	pct.1	pct.2	p_val_adj
Actc1	1.57402e-11	1.29528	0.504	0.281	3.23886e-07
Fabp4	1.03077e-07	1.07542	0.231	0.086	0.00212102
Tagln	3.92834e-10	1.05655	0.288	0.103	8.08335e-06
Mif	6.18443e-52	1.00793	0.958	0.871	1.27257e-47
Kcne3	2.84386e-18	0.993391	0.335	0.063	5.85181e-14
Gm42418	1.05991e-19	0.966201	0.525	0.202	2.18097e-15
Tpm1	2.83762e-12	0.964636	0.678	0.526	5.83896e-08
Ankrd1	1.31455e-06	0.916258	0.179	0.06	0.0270495
Myl7	2.2706e-07	0.886086	0.364	0.199	0.00467222
Col1a1	2.19981e-08	0.856102	0.164	0.033	0.000452655
Acta2	0.000394896	0.838074	0.231	0.139	1
Ccl2	0.185502	0.813375	0.244	0.215	1
Pgk1	7.6877e-24	0.733062	0.805	0.758	1.5819e-19
Myl3	0.0200831	0.719569	0.327	0.262	1
Ldha	2.81317e-33	0.706744	0.899	0.864	5.78867e-29
Eno1	4.90049e-15	0.704713	0.668	0.517	1.00837e-10
Sparcl1	3.27203e-18	0.700025	0.39	0.099	6.73286e-14
Odc1	2.96698e-10	0.690476	0.486	0.311	6.10515e-06
Pam	8.94088e-07	0.686768	0.494	0.344	0.0183976
Aldoa	9.55183e-27	0.652209	0.862	0.848	1.96548e-22
Gpc3	5.79592e-06	0.633629	0.182	0.07	0.119263
Cxcl12	1.92016e-06	0.62027	0.151	0.043	0.0395111
Bnip3	4.27501e-22	0.60786	0.374	0.06	8.79669e-18
Ncl	9.07528e-08	0.595383	0.66	0.656	0.00186742
Myh7	0.0276662	0.591447	0.14	0.089	1
Myadm	3.31018e-08	0.58523	0.506	0.374	0.000681135
Pkm	1.76489e-17	0.572538	0.81	0.795	3.63161e-13
Igfbp3	3.43897e-15	0.564485	0.413	0.136	7.07636e-11
Tpi1	9.41055e-09	0.563015	0.699	0.639	0.000193641
Myh9	8.54571e-07	0.559827	0.491	0.344	0.0175845
Plod2	2.22314e-11	0.534592	0.244	0.06	4.57456e-07
Myl4	0.0161837	0.532852	0.275	0.202	1
Clec1b	1.62795e-07	0.531183	0.226	0.086	0.00334983
Hist1h2ae	0.000159625	0.528896	0.288	0.179	1
Col4a2	2.92107e-08	0.521409	0.647	0.593	0.000601069
Gapdh	3.92334e-26	0.508587	0.971	0.96	8.07306e-22
Flt1	1.20331e-09	0.506947	0.504	0.325	2.47605e-05
Sat1	0.0139671	0.499046	0.468	0.43	1
Gng11	0.000150824	0.498518	0.753	0.834	1
Gpx3	5.86774e-08	0.493642	0.236	0.083	0.00120741
mt-Nd6	5.65159e-08	0.49158	0.41	0.225	0.00116293
Tcf4	2.10684e-07	0.470647	0.569	0.464	0.00433525
Prrc2c	1.69618e-07	0.462855	0.569	0.407	0.00349024
P4ha1	3.94214e-10	0.46077	0.426	0.222	8.11174e-06
Gpihbp1	2.13043e-05	0.457596	0.143	0.046	0.438378
Ier3	0.000319047	0.454015	0.343	0.242	1
Hspb1	0.00635736	0.451537	0.273	0.185	1
Gnl3	2.02762e-05	0.438781	0.387	0.248	0.417224
Rpl13a	6.59833e-08	0.433532	0.699	0.702	0.00135774
Slc16a3	2.21104e-15	0.431525	0.286	0.053	4.54965e-11
Tnnt2	0.0263059	0.422973	0.2	0.139	1
Pgam1	1.47404e-05	0.422578	0.655	0.642	0.303314
Nme2	1.69444e-07	0.422348	0.764	0.775	0.00348665
Fam162a	6.33179e-05	0.420308	0.751	0.745	1
Fabp3	0.000241029	0.417857	0.153	0.066	1
Pcdh17	5.07876e-08	0.413694	0.223	0.076	0.00104506
Ctgf	4.69459e-07	0.413432	0.179	0.053	0.00966005
Col4a1	2.39858e-06	0.411264	0.727	0.801	0.0493555
Pfkl	9.46467e-10	0.410787	0.382	0.179	1.94755e-05
Akap12	0.000323907	0.399934	0.481	0.387	1
Skil	0.000226222	0.397878	0.413	0.295	1
Igfbp7	6.30982e-05	0.397835	0.145	0.053	1
Lamc1	5.05127e-09	0.397112	0.361	0.169	0.00010394
Rpl5	4.29212e-24	0.395758	0.935	0.954	8.83189e-20
Mt1	9.01784e-06	0.393057	0.174	0.063	0.18556
Rrbp1	0.000185353	0.392156	0.571	0.523	1
Gm11808	9.69111e-11	0.390996	0.758	0.811	1.99414e-06
Npm1	1.89549e-16	0.388885	0.93	0.947	3.90035e-12
Myl12a	2.09556e-10	0.387919	0.875	0.914	4.31204e-06
Cryab	0.000810484	0.385672	0.135	0.06	1
Tnnc1	0.189875	0.382828	0.203	0.169	1
Uba52	3.70504e-30	0.382259	0.969	0.987	7.62385e-26
Hspd1	0.000118283	0.381078	0.704	0.692	1
Higd1a	1.90215e-08	0.380457	0.764	0.772	0.000391405
Srrm1	0.00934767	0.370637	0.535	0.493	1
Igf2r	0.025249	0.36842	0.766	0.821	1
Ccnd2	0.0536766	0.364579	0.553	0.573	1
Pabpc1	5.94935e-06	0.35805	0.74	0.781	0.12242
Ero1l	1.82173e-07	0.355566	0.312	0.142	0.00374857
Top2a	0.0472568	0.35457	0.301	0.255	1
Eif1a	0.00286728	0.351492	0.447	0.368	1
Ncam1	9.37603e-05	0.35132	0.158	0.063	1
Ap2a2	0.000380084	0.351079	0.416	0.288	1
Slc38a2	0.000915791	0.350761	0.608	0.593	1
Nexn	1.26924e-05	0.349944	0.119	0.03	0.261171
Nop58	0.00160325	0.349215	0.501	0.417	1
Fhl3	1.17942e-06	0.349124	0.174	0.053	0.024269
Eif5b	0.000179164	0.348709	0.584	0.507	1
Hk2	2.18026e-08	0.347805	0.283	0.113	0.000448631
Lrrc58	2.24341e-06	0.347565	0.319	0.169	0.0461626
Myl9	0.0113066	0.347297	0.145	0.086	1
Sept10	0.0219067	0.339596	0.434	0.371	1
Myl2	0.885139	0.339456	0.161	0.162	1
Malat1	9.77149e-12	0.33931	0.979	0.96	2.01068e-07
Ankrd37	1.201e-05	0.339261	0.218	0.096	0.24713
Bsg	4.40107e-06	0.338623	0.816	0.874	0.0905608
Slc2a1	1.30484e-08	0.336634	0.322	0.139	0.000268496
Rps2	2.59401e-25	0.336256	0.995	0.987	5.3377e-21
Peg10	6.26011e-06	0.33356	0.296	0.156	0.128814
Pttg1	0.15592	0.332072	0.314	0.281	1
Supt16	0.0394	0.330077	0.395	0.351	1
Knop1	0.0118734	0.328837	0.421	0.344	1
Ybx3	0.00191951	0.325329	0.488	0.414	1
Serbp1	5.13891e-08	0.324576	0.795	0.868	0.00105743
Rack1	1.49366e-16	0.324219	0.899	0.95	3.07351e-12
Alkbh5	0.0198996	0.323031	0.421	0.348	1
Tcea1	0.0314392	0.318407	0.444	0.407	1
Col1a2	0.0017394	0.318335	0.148	0.073	1
Ktn1	0.0151223	0.316806	0.543	0.52	1
Adgrf5	3.29567e-05	0.31473	0.343	0.212	0.678151
Cthrc1	0.137601	0.313588	0.125	0.093	1
Tomm5	0.0283644	0.312912	0.631	0.609	1
Cbx5	0.129969	0.311921	0.353	0.321	1
Hist1h1b	1.44506e-05	0.311613	0.143	0.046	0.29735
Loxl2	2.64818e-07	0.310329	0.283	0.123	0.00544917
Ccnd1	0.000986607	0.307441	0.392	0.285	1
Creb3l2	3.56392e-05	0.307393	0.288	0.156	0.733348
Kitl	5.3863e-10	0.306301	0.234	0.06	1.10834e-05
Meg3	0.0527758	0.306026	0.304	0.245	1
Grb10	0.116823	0.305829	0.449	0.427	1
Vcan	0.0369079	0.305732	0.138	0.089	1
1810022K09Rik	0.00105632	0.304997	0.686	0.709	1
Basp1	0.0699105	0.304179	0.395	0.344	1
Eif2s2	0.000195359	0.302035	0.782	0.851	1
Ddx3y	8.84067e-16	0.300434	0.192	0	1.81914e-11
Mef2a	0.000689538	0.29998	0.395	0.305	1
Tomm6	0.0747947	0.299602	0.273	0.225	1
Srrm2	0.00221165	0.29818	0.634	0.603	1
Timp3	0.000313068	0.297395	0.335	0.219	1
Prc1	0.0886463	0.296858	0.223	0.179	1
Arhgap29	0.00173397	0.296445	0.366	0.268	1
Eef1a1	4.27153e-23	0.294618	0.979	0.997	8.78953e-19
Cnbp	0.000912331	0.290972	0.779	0.808	1
Paip1	0.704414	0.290725	0.447	0.467	1
Thbs1	0.0105894	0.289987	0.101	0.05	1
Lsm12	0.0370033	0.287379	0.444	0.374	1
Itgb1	0.0217638	0.283094	0.629	0.682	1
Bex1	0.205861	0.281684	0.332	0.301	1
Erh	0.00229031	0.281521	0.769	0.854	1
Mef2c	0.00169632	0.280703	0.387	0.295	1
Zc3h15	0.0673025	0.27749	0.587	0.609	1
Tmsb4x	0.000374438	0.276631	1	0.997	1
Prelid1	0.0228706	0.274878	0.668	0.642	1
Stk38l	0.332157	0.27441	0.109	0.089	1
Rpl38	1.73453e-31	0.273469	0.997	1	3.56914e-27
Flna	0.0614784	0.272171	0.413	0.374	1
Gpi1	0.141139	0.272151	0.509	0.507	1
Nsa2	0.00457184	0.271751	0.657	0.702	1
Hnrnpa1	0.00412782	0.271697	0.883	0.927	1
Tuba1b	0.00251645	0.268591	0.761	0.818	1
Rasgrp3	0.00010235	0.267317	0.327	0.199	1
Hist1h2ap	0.114511	0.267021	0.223	0.185	1
Eif4ebp1	0.0356309	0.265035	0.504	0.487	1
Ppfibp1	1.90516e-06	0.264063	0.299	0.142	0.0392025
Ddx21	1.95565e-05	0.263969	0.294	0.156	0.402414
Actb	3.5939e-08	0.263876	1	1	0.000739516
Rpgrip1	0.00560362	0.263634	0.312	0.222	1
Mbnl2	0.230661	0.263326	0.317	0.275	1
Eif4a1	0.000188664	0.262463	0.844	0.877	1
Nap1l1	0.010589	0.260221	0.748	0.828	1
Mest	4.1144e-06	0.258908	0.873	0.917	0.0846621
Smad7	0.00282893	0.258742	0.291	0.199	1
Hsp90aa1	0.0053262	0.258701	0.686	0.722	1
Eif2s3y	1.14678e-13	0.25837	0.166	0	2.35972e-09
mt-Nd5	8.76785e-05	0.258315	0.836	0.917	1
Nid2	0.000149937	0.257181	0.156	0.063	1
Rpsa	1.6912e-20	0.256235	0.995	0.993	3.47998e-16
Galk1	0.221494	0.255717	0.4	0.391	1
Fzd4	0.00209576	0.254672	0.213	0.126	1
Pdap1	0.141684	0.254661	0.623	0.702	1
Kdm5b	0.00579688	0.254584	0.208	0.132	1
Map7d1	0.127936	0.254239	0.294	0.245	1
Ipo7	3.9155e-06	0.253511	0.278	0.136	0.0805693
Fndc3b	7.58172e-05	0.253461	0.265	0.142	1
Cenpf	0.0521811	0.253085	0.205	0.149	1
Mtdh	0.106926	0.252979	0.509	0.47	1
Rpl4	0.00284861	0.252065	0.779	0.861	1
Egln1	0.0292682	0.250882	0.278	0.212	1
Nudt9	0.0535688	0.250809	0.236	0.179	1
Bambi	0.334726	0.250202	0.294	0.281	1
Tcof1	0.00732009	0.250133	0.171	0.103	1
Adgrg6	5.14085e-09	-0.250886	0.179	0.381	0.000105783
Foxc1	1.05637e-09	-0.251027	0.158	0.348	2.17369e-05
Sf3b6	7.46142e-10	-0.253181	0.579	0.768	1.53534e-05
Mrps14	3.1857e-09	-0.253193	0.47	0.699	6.55521e-05
Hat1	2.39502e-06	-0.253538	0.262	0.414	0.0492822
Rbm4b	4.16751e-08	-0.25502	0.203	0.371	0.000857549
Jpt1	2.87957e-08	-0.256193	0.587	0.781	0.000592529
Etfb	2.71682e-12	-0.256336	0.408	0.656	5.5904e-08
Cox20	4.72378e-08	-0.257445	0.314	0.487	0.000972013
Rhoa	5.86824e-10	-0.258671	0.73	0.911	1.20751e-05
Lmo4	2.80884e-11	-0.258795	0.392	0.629	5.77976e-07
Sf3b5	1.74503e-09	-0.260698	0.649	0.858	3.59074e-05
Irx5	4.22206e-08	-0.261198	0.153	0.331	0.000868774
Capns1	5.97017e-13	-0.261367	0.486	0.719	1.22848e-08
Rgs3	2.81687e-06	-0.262503	0.21	0.358	0.0579627
Ube2e3	7.3501e-10	-0.263516	0.496	0.709	1.51243e-05
Crip1	1.86764e-12	-0.264117	0.587	0.828	3.84305e-08
Ctsk	1.436e-09	-0.265228	0.112	0.288	2.95485e-05
Wnt4	8.14381e-08	-0.26534	0.049	0.172	0.00167575
Ggta1	1.03359e-09	-0.269126	0.234	0.447	2.12681e-05
Pclaf	0.0122053	-0.270815	0.434	0.53	1
Smdt1	4.60949e-13	-0.271238	0.636	0.841	9.48495e-09
H19	0.00229316	-0.271699	0.847	0.974	1
Col13a1	1.16266e-10	-0.271722	0.14	0.338	2.39241e-06
Trappc2l	1.00649e-11	-0.27184	0.392	0.639	2.07106e-07
Ubb	1.08216e-16	-0.271913	0.953	0.99	2.22676e-12
Stub1	6.44749e-11	-0.272851	0.358	0.593	1.3267e-06
Echs1	1.40253e-09	-0.273649	0.275	0.48	2.88599e-05
Mfap2	1.95513e-12	-0.274494	0.379	0.679	4.02307e-08
Rbp1	3.93091e-08	-0.274519	0.662	0.858	0.000808863
Cfh	8.28775e-11	-0.279659	0.07	0.248	1.70537e-06
Atox1	3.62818e-08	-0.279881	0.722	0.914	0.00074657
Sumo2	4.36629e-14	-0.279965	0.852	0.937	8.98452e-10
Yipf4	5.20252e-08	-0.281095	0.312	0.477	0.00107052
Bcl2l12	6.95638e-12	-0.281402	0.112	0.315	1.43141e-07
Abhd17a	1.26015e-08	-0.283065	0.426	0.629	0.000259301
Fos	3.59297e-07	-0.284936	0.2	0.361	0.00739325
Ackr3	3.40101e-13	-0.285703	0.164	0.421	6.99825e-09
Ptov1	2.85459e-11	-0.286889	0.4	0.632	5.87388e-07
Ndufa5	1.86853e-13	-0.286912	0.582	0.808	3.84488e-09
Cited2	1.89837e-06	-0.287543	0.332	0.497	0.0390627
Ifitm2	1.45579e-10	-0.289325	0.818	0.93	2.99559e-06
Vamp8	2.95208e-11	-0.28994	0.491	0.692	6.0745e-07
Lsm5	1.55779e-10	-0.289989	0.592	0.791	3.20547e-06
Ecm1	6.58344e-10	-0.290911	0.164	0.358	1.35467e-05
Hebp1	1.58427e-11	-0.290972	0.278	0.497	3.25996e-07
Tsc22d1	7.82172e-10	-0.291814	0.444	0.656	1.60947e-05
Psmb6	1.04907e-09	-0.293131	0.519	0.732	2.15866e-05
Rap1a	4.24484e-11	-0.293404	0.592	0.798	8.73462e-07
Plvap	1.13451e-12	-0.296588	0.447	0.709	2.33448e-08
Arf5	2.7607e-12	-0.298011	0.681	0.877	5.6807e-08
Tceal9	8.12163e-12	-0.298179	0.745	0.924	1.67119e-07
Tmem108	1.23767e-14	-0.298801	0.231	0.503	2.54675e-10
Ywhaq	3.90024e-13	-0.299348	0.649	0.871	8.02553e-09
Plpp3	1.97489e-08	-0.300163	0.195	0.374	0.000406373
Gja4	1.21788e-10	-0.304673	0.195	0.437	2.50603e-06
Bcas2	4.05151e-12	-0.308997	0.527	0.758	8.3368e-08
Prdx2	3.14627e-12	-0.309474	0.805	0.957	6.47408e-08
Ndufa4	1.36628e-16	-0.3098	0.896	0.974	2.8114e-12
Dynll1	2.61339e-13	-0.312221	0.896	0.974	5.37757e-09
mt-Nd4	1.52338e-22	-0.315006	0.987	0.99	3.13466e-18
Tsc22d3	1.14343e-11	-0.317201	0.148	0.361	2.35284e-07
H3f3a	7.49895e-21	-0.317472	0.927	0.964	1.54306e-16
Phf5a	1.10327e-11	-0.318056	0.468	0.702	2.2702e-07
Klk8	1.10262e-06	-0.320372	0.356	0.517	0.0226885
Klhl4	1.00517e-12	-0.321498	0.314	0.553	2.06833e-08
Sptssa	3.04778e-12	-0.32195	0.491	0.715	6.27143e-08
Nnat	1.79579e-05	-0.322638	0.091	0.202	0.36952
Myl12b	2.11356e-12	-0.323958	0.527	0.765	4.34908e-08
Naxe	1.39318e-11	-0.32757	0.278	0.526	2.86675e-07
Stmn1	4.81017e-11	-0.329368	0.626	0.838	9.8979e-07
Gm30648	7.71513e-11	-0.331579	0.119	0.308	1.58754e-06
Gpr182	3.72835e-08	-0.334537	0.203	0.387	0.000767183
Blvrb	2.64018e-12	-0.339332	0.278	0.526	5.4327e-08
Uqcrb	5.55784e-13	-0.339783	0.821	0.944	1.14364e-08
Cirbp	6.0688e-16	-0.341438	0.231	0.507	1.24878e-11
Igfbp4	4.43072e-13	-0.352784	0.67	0.904	9.1171e-09
Alyref	1.55013e-14	-0.353951	0.631	0.861	3.1897e-10
Emp3	1.27531e-17	-0.356287	0.335	0.656	2.6242e-13
Gatm	1.38598e-12	-0.357844	0.205	0.444	2.85193e-08
H2afv	2.00744e-13	-0.361243	0.662	0.887	4.13072e-09
Mdk	1.6907e-13	-0.362742	0.61	0.871	3.47895e-09
Cpe	1.0802e-12	-0.364636	0.148	0.374	2.22272e-08
Sox4	3.7116e-13	-0.367267	0.532	0.755	7.63736e-09
Cavin2	1.64849e-14	-0.368711	0.358	0.662	3.3921e-10
Vamp5	4.2051e-17	-0.377387	0.47	0.752	8.65284e-13
Ifitm3	2.61721e-13	-0.385849	0.421	0.692	5.38542e-09
Crip2	3.57284e-17	-0.38596	0.725	0.921	7.35182e-13
S100a13	4.26196e-13	-0.388338	0.436	0.669	8.76984e-09
Prdx1	2.07605e-21	-0.392093	0.878	0.964	4.27188e-17
Pfdn1	1.856e-17	-0.393294	0.429	0.709	3.81909e-13
Mndal	6.1442e-11	-0.394521	0.057	0.222	1.26429e-06
Tmem176a	2.80546e-16	-0.404558	0.262	0.573	5.7728e-12
Arl4a	4.06437e-18	-0.410429	0.195	0.49	8.36326e-14
Gngt2	6.26426e-15	-0.411356	0.475	0.719	1.289e-10
Ebf1	5.86362e-08	-0.411428	0.426	0.629	0.00120656
Ccdc12	3.6554e-19	-0.41354	0.317	0.639	7.52172e-15
Calm2	3.61458e-15	-0.413696	0.745	0.914	7.43773e-11
Atpif1	1.24935e-23	-0.417416	0.81	0.947	2.57078e-19
Bik	1.45178e-12	-0.41973	0.174	0.404	2.98733e-08
Pnrc1	7.23012e-18	-0.425557	0.46	0.735	1.48774e-13
Ctla2a	2.21981e-10	-0.426109	0.631	0.854	4.56769e-06
Ifi211	2.98733e-14	-0.437835	0.073	0.285	6.14703e-10
Cdh11	1.02397e-20	-0.446992	0.247	0.599	2.10702e-16
Tnni1	1.99091e-17	-0.458468	0.218	0.536	4.0967e-13
Gm10076	4.61056e-28	-0.490073	0.709	0.944	9.48716e-24
mt-Cytb	9.62545e-34	-0.498778	0.995	0.993	1.98063e-29
Maged2	5.03404e-17	-0.500683	0.426	0.699	1.03585e-12
Ramp2	3.04009e-25	-0.510769	0.748	0.94	6.25559e-21
Tsix	2.9981e-36	-0.513505	0	0.351	6.1692e-32
Tm4sf1	6.18705e-14	-0.514417	0.668	0.874	1.27311e-09
Ifi205	3.47122e-20	-0.515749	0.044	0.298	7.14272e-16
mt-Atp6	1.70776e-46	-0.532711	0.987	1	3.51406e-42
Jun	1.98926e-12	-0.534173	0.512	0.722	4.09331e-08
Bace2	3.66397e-21	-0.535373	0.153	0.48	7.53934e-17
Gm1673	1.60879e-21	-0.537736	0.54	0.838	3.3104e-17
Apoe	4.02566e-17	-0.546239	0.439	0.765	8.28361e-13
Mgp	8.97085e-13	-0.554843	0.317	0.579	1.84593e-08
Id2	1.03549e-20	-0.556079	0.442	0.795	2.13072e-16
Gsta4	6.86183e-20	-0.590809	0.26	0.593	1.41196e-15
Tmem176b	8.26064e-28	-0.612695	0.405	0.788	1.69979e-23
Ednrb	2.95291e-22	-0.68716	0.39	0.728	6.0762e-18
Cdkn1c	1.77059e-39	-0.889966	0.834	0.964	3.64335e-35
Klf2	4.82348e-50	-1.2681	0.369	0.838	9.92527e-46
Xist	1.84853e-106	-1.91647	0.003	0.851	3.80371e-102
