# Supplementary material for: Single Cell Sequencing Reveals Mechanisms of Persistent Truncus Arteriosus Formation after PDGFRα and PDGFRβ Double Knockout in Cardiac Neural Crest Cells
Source: Genes (Basel). 2022 Sep 23;13(10):1708. doi: 10.3390/genes13101708 (PMC9601305; doi:10.3390/genes13101708)
Supplement: Supplementary file 1 [file genes-13-01708-s001.zip › Table S6. Differentially expressed genes between CM I, II and III. Related to Figure 4.xlsx]

## Sheet: CM I
Table S3. Differentially expressed genes between CM I, II and III. Related to Figure 4.
gene	p_val	avg_logFC	pct.1	pct.2	p_val_adj
Malat1	2.1256e-277	1.45122	0.996	0.771	4.12946e-275
Itm2a	4.68505e-160	1.24916	0.732	0.426	9.64043e-156
Actb	1.58871e-116	1.146	0.97	0.791	3.26908e-112
Bmp4	5.58387e-210	1.14107	0.495	0.057	1.14899e-205
Clu	1.85229e-95	1.05842	0.624	0.374	3.81146e-91
Cxcl12	9.77933e-158	1.05784	0.809	0.559	2.01229e-153
Igfbp5	1.1977e-119	1.05244	0.589	0.276	2.46451e-115
Gpc3	1.66575e-143	1.00436	0.806	0.53	3.42761e-139
Rspo3	7.64991e-208	0.959522	0.483	0.055	1.57412e-203
Col1a2	3.41362e-166	0.930569	0.358	0.018	7.02421e-162
Ctsl	1.37429e-147	0.92715	0.795	0.538	2.82787e-143
Bsg	4.73189e-277	0.90246	0.959	0.764	9.7368e-273
Eln	3.8058e-149	0.876217	0.359	0.032	7.8312e-145
Mt1	3.07104e-74	0.847818	0.731	0.569	6.31928e-70
Actg1	2.40747e-118	0.84628	0.922	0.734	4.95385e-114
Cited2	1.26071e-113	0.790456	0.654	0.362	2.59417e-109
Cst3	2.25663e-111	0.785456	0.916	0.758	4.64347e-107
Apoe	1.03486e-134	0.770715	0.524	0.165	2.12943e-130
Hk2	1.47324e-126	0.759557	0.708	0.398	3.03149e-122
Id3	4.71428e-96	0.745409	0.509	0.191	9.70058e-92
Cox4i2	3.20405e-177	0.741468	0.555	0.121	6.59297e-173
Klf2	1.79405e-82	0.739694	0.378	0.125	3.69161e-78
Meg3	2.9296e-133	0.73917	0.579	0.235	6.02824e-129
Bambi	3.5801e-133	0.729619	0.795	0.565	7.36677e-129
Gng11	8.09296e-127	0.71331	0.601	0.267	1.66529e-122
Ncam1	1.25168e-145	0.692274	0.505	0.133	2.57558e-141
Slc38a2	4.76575e-103	0.691035	0.761	0.521	9.80648e-99
Csrp2	4.01848e-48	0.686511	0.876	0.835	8.26883e-44
Vim	8.6851e-103	0.672562	0.856	0.686	1.78713e-98
Bnip3	1.6866e-120	0.650855	0.832	0.644	3.47052e-116
Hes1	3.64322e-70	0.650634	0.568	0.335	7.49666e-66
Crabp1	2.30842e-83	0.628705	0.261	0.041	4.75004e-79
Jun	3.02381e-66	0.621784	0.676	0.476	6.2221e-62
mt-Nd6	1.03511e-83	0.620569	0.629	0.367	2.12994e-79
Slc2a3	1.2777e-108	0.619717	0.406	0.107	2.62912e-104
Ptn	6.97062e-50	0.614916	0.271	0.096	1.43434e-45
Ier3	7.75688e-80	0.610966	0.511	0.25	1.59613e-75
Tagln2	2.60022e-34	0.604782	0.462	0.286	5.35048e-30
Plod2	1.35641e-141	0.602829	0.549	0.177	2.79109e-137
Lgals1	4.4717e-42	0.602369	0.705	0.534	9.20141e-38
Slc2a1	1.47924e-68	0.59997	0.755	0.561	3.04383e-64
Loxl2	4.97473e-134	0.594408	0.564	0.197	1.02365e-129
Peg3	4.04541e-75	0.590616	0.622	0.372	8.32424e-71
Krt18	9.87196e-52	0.588361	0.404	0.192	2.03135e-47
Myadm	8.66927e-72	0.582388	0.635	0.393	1.78388e-67
Fos	1.22556e-30	0.580885	0.571	0.438	2.52183e-26
Klf6	9.33889e-77	0.579272	0.575	0.321	1.92166e-72
mt-Nd5	6.71678e-126	0.577179	0.928	0.697	1.38211e-121
Igfbp7	9.93777e-91	0.576546	0.334	0.08	2.04489e-86
Marcks	3.55976e-71	0.567717	0.645	0.402	7.32491e-67
Gm26532	2.67364e-57	0.561108	0.396	0.18	5.50155e-53
Skil	1.76427e-92	0.559501	0.565	0.275	3.63033e-88
Mfap2	2.52531e-40	0.550712	0.398	0.226	5.19632e-36
Sparc	2.61579e-86	0.544163	0.859	0.661	5.38251e-82
Igf2r	5.61125e-85	0.541859	0.875	0.622	1.15463e-80
H2-Ab1	4.56003e-111	0.540852	0.442	0.118	9.38318e-107
Ttn	5.94957e-67	0.539847	0.802	0.638	1.22424e-62
Ankrd1	7.65165e-44	0.539219	0.867	0.863	1.57448e-39
Cd63	1.56617e-89	0.520586	0.779	0.556	3.2227e-85
Ndufa4l2	1.71133e-84	0.520024	0.359	0.093	3.52141e-80
Sptbn1	2.17719e-69	0.511318	0.688	0.489	4.48e-65
Itgb1	5.56385e-66	0.508486	0.738	0.53	1.14487e-61
Pam	1.31702e-62	0.504803	0.876	0.63	2.71002e-58
Fzd1	2.04725e-116	0.504183	0.471	0.145	4.21262e-112
Vegfa	5.73738e-76	0.502508	0.51	0.255	1.18058e-71
mt-Co1	1.45019e-127	0.501994	0.999	0.917	2.98405e-123
Id1	4.11076e-77	0.496866	0.373	0.123	8.4587e-73
Itm2b	1.98476e-64	0.494902	0.812	0.64	4.08403e-60
Ifitm2	2.0512e-59	0.492403	0.627	0.426	4.22076e-55
P4ha2	5.54292e-117	0.492192	0.417	0.1	1.14057e-112
Prnp	5.28603e-75	0.488087	0.503	0.25	1.08771e-70
Ktn1	4.75521e-58	0.483514	0.676	0.477	9.7848e-54
Kcne1	3.73926e-24	0.477181	0.576	0.49	7.69428e-20
Serpinh1	5.75892e-76	0.470987	0.856	0.649	1.18501e-71
Nfia	2.61985e-26	0.466958	0.358	0.22	5.39087e-22
P4ha1	1.51813e-85	0.463629	0.445	0.17	3.12386e-81
Ero1l	1.46453e-80	0.461678	0.452	0.183	3.01357e-76
S100a11	1.60678e-64	0.461124	0.715	0.514	3.30627e-60
Tgfb2	3.1051e-70	0.459816	0.536	0.273	6.38937e-66
Ckap4	3.17345e-59	0.455618	0.594	0.37	6.53001e-55
Tsc22d1	1.15991e-47	0.447892	0.741	0.591	2.38675e-43
S100a10	1.62388e-46	0.446544	0.535	0.334	3.34145e-42
Pmp22	1.24472e-90	0.446188	0.311	0.063	2.56126e-86
Slc16a3	2.11789e-71	0.440687	0.601	0.345	4.35799e-67
Gpx3	1.33966e-30	0.436129	0.69	0.605	2.75661e-26
H19	2.26744e-37	0.433812	0.817	0.691	4.6657e-33
Nexn	3.70776e-65	0.433351	0.857	0.768	7.62946e-61
Higd1a	1.05571e-89	0.424429	0.932	0.883	2.17234e-85
Atp2b1	9.02098e-54	0.422183	0.546	0.328	1.85625e-49
Lmo4	5.26125e-51	0.419939	0.526	0.32	1.08261e-46
Tmem59	7.38654e-56	0.415654	0.691	0.502	1.51993e-51
Cald1	4.00502e-39	0.412871	0.401	0.222	8.24113e-35
Gata6	1.63157e-59	0.402827	0.634	0.421	3.35729e-55
Ctsd	2.64607e-41	0.40036	0.564	0.396	5.44483e-37
Gjc1	1.76436e-53	0.399924	0.476	0.269	3.63052e-49
Mgarp	1.56772e-88	0.399877	0.378	0.105	3.2259e-84
Pcgf5	1.05258e-47	0.399745	0.537	0.344	2.1659e-43
Cd81	9.87126e-67	0.394367	0.891	0.737	2.03121e-62
mt-Nd2	1.35545e-87	0.393445	0.996	0.893	2.78911e-83
Pfkp	6.15377e-57	0.392758	0.529	0.308	1.26626e-52
Ankrd37	3.83889e-66	0.392567	0.339	0.114	7.89929e-62
Masp1	3.35642e-99	0.392012	0.294	0.045	6.9065e-95
Sema3c	2.58146e-61	0.391241	0.282	0.084	5.31186e-57
Sec62	1.05991e-45	0.390773	0.67	0.493	2.18098e-41
Id2	3.79832e-38	0.389265	0.646	0.46	7.81581e-34
Cdkn1a	5.88206e-45	0.389101	0.323	0.141	1.21035e-40
Atf3	2.65652e-09	0.385254	0.436	0.368	5.46633e-05
P4hb	1.20792e-51	0.383392	0.554	0.337	2.48555e-47
Atp1b1	1.32777e-41	0.382407	0.79	0.656	2.73215e-37
H3f3b	8.10593e-38	0.382164	0.899	0.801	1.66796e-33
Isl1	8.56648e-122	0.38079	0.261	0.008	1.76272e-117
Vcan	1.04177e-25	0.378948	0.594	0.443	2.14365e-21
Myl7	3.90631e-46	0.376496	0.96	0.994	8.03802e-42
Btg1	6.16352e-35	0.373404	0.639	0.481	1.26827e-30
Rcn3	1.65666e-44	0.370467	0.448	0.256	3.40891e-40
Smad7	3.32241e-70	0.368777	0.339	0.109	6.83653e-66
Jund	2.36753e-46	0.365976	0.824	0.715	4.87167e-42
Spry2	1.39174e-16	0.362216	0.639	0.533	2.86378e-12
Eif4a2	7.13152e-46	0.361311	0.643	0.457	1.46745e-41
Nfib	9.8024e-30	0.359237	0.581	0.419	2.01704e-25
Wnt5a	2.72242e-52	0.358956	0.344	0.145	5.60192e-48
Krt19	1.58198e-49	0.356228	0.388	0.179	3.25523e-45
Fn1	4.50215e-34	0.352383	0.336	0.174	9.26407e-30
Ctsb	3.20841e-39	0.3513	0.577	0.404	6.60194e-35
Pdlim3	2.71856e-10	0.350745	0.542	0.473	5.59399e-06
Cdh2	1.71566e-36	0.34104	0.692	0.533	3.53031e-32
Pafah1b3	5.00858e-49	0.340842	0.714	0.55	1.03062e-44
Rbpms	1.26323e-51	0.338418	0.827	0.745	2.59935e-47
Irf2bpl	5.9282e-36	0.336821	0.498	0.321	1.21985e-31
Rtn4	3.89993e-41	0.333801	0.627	0.444	8.02489e-37
Svil	1.21542e-29	0.333711	0.602	0.463	2.50097e-25
C530008M17Rik	4.03575e-67	0.332517	0.343	0.115	8.30437e-63
Mbnl2	3.91329e-31	0.32999	0.43	0.27	8.05238e-27
Jup	2.88074e-53	0.329008	0.435	0.217	5.92771e-49
Selenbp1	3.28067e-50	0.326076	0.355	0.151	6.75063e-46
Vldlr	3.50446e-32	0.322627	0.416	0.255	7.21113e-28
Ctsa	1.68755e-49	0.322441	0.44	0.234	3.47247e-45
Notch2	4.5459e-17	0.322125	0.286	0.18	9.35409e-13
Pdgfa	1.4993e-32	0.322016	0.539	0.38	3.0851e-28
Egln1	1.62545e-54	0.321623	0.577	0.36	3.34469e-50
Prrc2c	2.26768e-28	0.32151	0.514	0.353	4.66621e-24
Hsp90aa1	1.6314e-07	0.320777	0.815	0.725	0.00335693
Fermt2	1.61112e-41	0.320182	0.729	0.588	3.31521e-37
Sox11	1.36296e-32	0.319551	0.46	0.292	2.80457e-28
Soat1	1.66556e-58	0.318935	0.251	0.064	3.42723e-54
Cd47	6.01887e-32	0.318929	0.431	0.268	1.2385e-27
Tbx20	5.4132e-27	0.317652	0.509	0.364	1.11387e-22
Laptm4a	1.18775e-33	0.317096	0.818	0.638	2.44403e-29
Enah	2.31988e-21	0.315435	0.456	0.324	4.77362e-17
Ank3	4.95401e-30	0.312889	0.554	0.393	1.01939e-25
Srrm2	1.03638e-30	0.311692	0.695	0.558	2.13256e-26
Bnip3l	7.6651e-50	0.307985	0.745	0.616	1.57725e-45
Kdelr2	2.9003e-22	0.307844	0.629	0.491	5.96796e-18
Sec11a	2.91148e-34	0.306484	0.658	0.506	5.99095e-30
Pgm2	6.76212e-40	0.30577	0.649	0.49	1.39144e-35
Raph1	4.57033e-36	0.304515	0.435	0.257	9.40437e-32
Tmbim6	1.63108e-29	0.302866	0.577	0.416	3.35627e-25
Scd2	1.18892e-26	0.302775	0.535	0.385	2.44643e-22
Tmsb4x	5.65208e-47	0.302611	0.999	0.997	1.16303e-42
Sox4	5.28059e-21	0.302383	0.544	0.415	1.08659e-16
Fam198b	1.02093e-32	0.302005	0.396	0.233	2.10076e-28
Irf2bp2	1.6009e-34	0.302	0.428	0.25	3.29416e-30
Pmepa1	4.78556e-66	0.30103	0.401	0.16	9.84724e-62
Tceal9	2.84656e-34	0.300887	0.869	0.823	5.85736e-30
Prelid2	1.17821e-42	0.300883	0.619	0.44	2.4244e-38
Plk2	3.71118e-19	0.300642	0.472	0.344	7.63649e-15
Ddah1	1.68759e-37	0.300496	0.561	0.377	3.47255e-33
Bhlhe41	7.96565e-37	0.299943	0.276	0.119	1.63909e-32
Ctgf	1.39136e-07	0.299665	0.524	0.465	0.002863
Ahnak	3.92744e-39	0.299542	0.451	0.266	8.08149e-35
Fam162a	7.82021e-64	0.298144	0.932	0.901	1.60916e-59
Dag1	6.6466e-37	0.297762	0.523	0.34	1.36767e-32
Anxa2	1.19904e-37	0.296881	0.599	0.423	2.46726e-33
Tiparp	1.70062e-62	0.296488	0.383	0.15	3.49936e-58
Cyr61	9.99186e-18	0.295662	0.43	0.32	2.05602e-13
Dsp	1.09576e-29	0.295368	0.558	0.402	2.25474e-25
Cox6a2	9.4605e-06	0.294378	0.752	0.871	0.194669
Adam10	7.24774e-18	0.293231	0.518	0.399	1.49137e-13
Rhob	7.40077e-28	0.292837	0.502	0.347	1.52286e-23
Fzd2	8.70525e-35	0.292278	0.445	0.266	1.79128e-30
Arhgap5	3.49452e-34	0.292128	0.506	0.326	7.19067e-30
Htra1	4.09902e-57	0.291914	0.276	0.085	8.43456e-53
Ltbp1	2.53634e-31	0.291141	0.343	0.185	5.21902e-27
Zfp36l1	1.0067e-30	0.290939	0.547	0.386	2.07148e-26
Igsf3	7.02569e-36	0.289435	0.298	0.142	1.44568e-31
Irs2	3.99551e-29	0.28943	0.43	0.277	8.22155e-25
Klhl24	1.11299e-35	0.288818	0.435	0.258	2.2902e-31
Cebpb	2.32781e-36	0.28786	0.434	0.252	4.78994e-32
P3h4	4.43402e-35	0.287836	0.316	0.159	9.12387e-31
Lmo7	8.00556e-25	0.287131	0.514	0.371	1.6473e-20
Sorbs2	5.03248e-24	0.285894	0.741	0.616	1.03553e-19
Fstl1	1.89754e-11	0.285514	0.613	0.516	3.90457e-07
Tnfrsf12a	2.06665e-16	0.284878	0.482	0.367	4.25254e-12
Meis2	1.09173e-19	0.283726	0.511	0.391	2.24644e-15
Rrbp1	4.47113e-30	0.283464	0.329	0.177	9.20025e-26
Lgmn	2.19713e-27	0.283056	0.411	0.261	4.52102e-23
mt-Nd3	6.65642e-39	0.282906	0.956	0.803	1.36969e-34
Mif	1.74066e-77	0.282356	0.991	0.985	3.58176e-73
Stk38l	5.49534e-19	0.281709	0.38	0.26	1.13078e-14
F2r	2.30218e-10	0.281364	0.265	0.188	4.73719e-06
Kif5b	5.32228e-29	0.280951	0.761	0.633	1.09517e-24
Igf1r	3.75112e-34	0.280515	0.473	0.294	7.71869e-30
Ssr3	2.34532e-21	0.279932	0.564	0.433	4.82597e-17
Lpp	6.72579e-31	0.27817	0.414	0.249	1.38397e-26
F11r	5.48408e-66	0.276991	0.278	0.073	1.12846e-61
Col4a5	5.92107e-42	0.276608	0.404	0.216	1.21838e-37
Tmed10	2.3236e-30	0.276388	0.748	0.611	4.78126e-26
Myh7	1.2525e-29	0.276196	0.892	0.869	2.57727e-25
Dnajb4	2.39668e-34	0.276163	0.351	0.187	4.93164e-30
Tspan6	3.82941e-14	0.275175	0.421	0.318	7.87978e-10
Dync1i2	1.39009e-27	0.272871	0.586	0.45	2.86039e-23
Hsp90b1	8.01958e-24	0.271793	0.812	0.627	1.65019e-19
Midn	2.43936e-16	0.271631	0.363	0.251	5.01947e-12
Nid2	2.40364e-23	0.27102	0.471	0.332	4.94598e-19
Zmiz1	7.40127e-42	0.270994	0.426	0.232	1.52296e-37
Erp29	2.07985e-27	0.270283	0.655	0.528	4.27971e-23
Smad6	1.64104e-46	0.269067	0.298	0.113	3.37676e-42
Insig2	3.58225e-39	0.267998	0.322	0.149	7.3712e-35
Selenok	2.32411e-20	0.267882	0.752	0.625	4.78232e-16
Arl6ip5	5.40104e-25	0.267665	0.545	0.403	1.11137e-20
Fry	3.01249e-56	0.266817	0.306	0.107	6.19881e-52
Prdx4	1.96896e-21	0.265092	0.695	0.562	4.05153e-17
Ctnnb1	1.69248e-23	0.264476	0.664	0.524	3.48262e-19
Dst	9.3322e-31	0.263803	0.36	0.205	1.92029e-26
Fabp5	1.29003e-11	0.263157	0.558	0.473	2.65448e-07
Kdm5b	3.27375e-36	0.26127	0.316	0.151	6.7364e-32
Tmem50a	4.92186e-26	0.260842	0.586	0.435	1.01277e-21
Son	2.07555e-33	0.260318	0.665	0.51	4.27085e-29
Gem	4.53101e-15	0.259893	0.322	0.218	9.32346e-11
Ivns1abp	4.72619e-21	0.259292	0.527	0.397	9.72509e-17
Pla2g12a	4.95375e-39	0.258431	0.504	0.321	1.01933e-34
Sfrp1	4.0632e-15	0.258248	0.715	0.608	8.36084e-11
Naa35	1.17037e-23	0.257908	0.403	0.264	2.40826e-19
Hist1h2bc	2.22434e-30	0.255393	0.297	0.144	4.57703e-26
Anxa5	1.44158e-13	0.255192	0.701	0.6	2.96634e-09
Furin	1.28121e-28	0.253997	0.268	0.133	2.63635e-24
Wls	4.87323e-23	0.253833	0.453	0.312	1.00276e-18
Rasl11b	4.58815e-34	0.25305	0.434	0.261	9.44104e-30
Atp6v0b	1.69525e-23	0.252628	0.725	0.617	3.48831e-19
Bex3	2.06397e-26	0.25262	0.899	0.88	4.24704e-22
Luc7l2	7.05603e-20	0.250698	0.494	0.36	1.45192e-15
Ptprs	3.34848e-24	0.250642	0.404	0.263	6.89017e-20
Stt3b	7.90888e-22	0.250543	0.341	0.211	1.62741e-17

## Sheet: CM II
gene	p_val	avg_logFC	pct.1	pct.2	p_val_adj
Mest	4.31672e-144	0.973165	0.68	0.247	8.88251e-140
Gja1	1.56507e-261	0.819356	0.655	0.116	3.22045e-257
mt-Atp6	6.89206e-287	0.705928	0.999	0.961	1.41818e-282
Atp2a2	3.26601e-171	0.589861	0.951	0.525	6.72047e-167
Nppb	1.36936e-205	0.579159	0.999	0.896	2.81773e-201
mt-Nd1	1.60282e-25	0.560853	0.471	0.292	3.29813e-21
Cited1	2.38964e-84	0.546527	0.577	0.253	4.91717e-80
mt-Co3	3.62836e-213	0.539363	1	0.984	7.46608e-209
mt-Cytb	7.85165e-175	0.534694	1	0.971	1.61563e-170
Smpx	4.06975e-140	0.495908	0.962	0.64	8.37433e-136
mt-Co2	3.10046e-154	0.467257	1	0.975	6.37982e-150
Cox6a1	1.94055e-156	0.465765	0.99	0.776	3.99307e-152
Hspa5	3.38836e-117	0.457485	0.886	0.494	6.97223e-113
Myl2	6.57254e-127	0.446648	0.998	0.807	1.35243e-122
Xist	7.08958e-158	0.436972	0.657	0.175	1.45882e-153
mt-Nd4	2.69822e-126	0.419698	0.998	0.904	5.55214e-122
mt-Nd4l	6.67922e-88	0.395688	0.977	0.648	1.37438e-83
Manf	3.51577e-106	0.395368	0.865	0.489	7.2344e-102
Tcap	1.93887e-111	0.39213	0.852	0.418	3.9896e-107
Mdk	1.63851e-110	0.389074	0.822	0.435	3.37157e-106
Bves	1.00071e-146	0.387403	0.673	0.242	2.05917e-142
Calr	3.71925e-120	0.369733	0.799	0.387	7.6531e-116
Tnni1	3.3691e-124	0.360843	0.991	0.879	6.9326e-120
Trdn	4.73293e-119	0.356189	0.76	0.341	9.73895e-115
Lpl	1.59485e-141	0.343858	0.499	0.124	3.28172e-137
mt-Nd31	2.72956e-67	0.340434	0.997	0.808	5.61661e-63
Tnni2	7.02614e-49	0.329096	0.292	0.1	1.44577e-44
Gadd45g	7.85995e-73	0.322619	0.771	0.415	1.61734e-68
Uqcrc1	2.80372e-92	0.315969	0.933	0.598	5.76921e-88
Cox4i1	8.36557e-123	0.314542	0.999	0.951	1.72138e-118
Atp5b	7.28347e-81	0.312451	0.988	0.751	1.49872e-76
Ldhb	6.59036e-83	0.312119	0.97	0.705	1.3561e-78
Banf1	1.33926e-89	0.312089	0.94	0.622	2.75579e-85
Hopx	4.31209e-109	0.31147	0.911	0.498	8.87298e-105
Gyg	1.8316e-100	0.311355	0.995	0.9	3.76889e-96
Homer2	5.51773e-157	0.307089	0.711	0.245	1.13538e-152
Ndufa4	1.13965e-116	0.306764	0.998	0.97	2.34505e-112
Fitm1	1.44773e-122	0.30468	0.661	0.257	2.97899e-118
Hspd1	3.05432e-83	0.303953	0.977	0.76	6.28488e-79
Mrpl36	2.5316e-110	0.302456	0.913	0.538	5.20926e-106
Hsp90b11	1.97202e-70	0.302139	0.952	0.586	4.05783e-66
Prdx1	6.22372e-83	0.299557	0.984	0.81	1.28065e-78
Aco2	1.91277e-90	0.296812	0.888	0.484	3.9359e-86
Myh6	3.29389e-85	0.293018	0.779	0.403	6.77783e-81
Atp5a1	2.19565e-75	0.292175	0.973	0.714	4.51799e-71
Nme1	3.86681e-97	0.291476	0.931	0.59	7.95673e-93
Arl6ip1	8.23106e-71	0.284884	0.631	0.308	1.6937e-66
Pdia6	5.17719e-78	0.283182	0.814	0.464	1.06531e-73
Capn6	6.07865e-127	0.279641	0.473	0.118	1.2508e-122
Tusc3	2.30705e-111	0.279179	0.573	0.208	4.74721e-107
Fhl2	1.69433e-118	0.274441	0.678	0.254	3.48643e-114
Sdha	1.26309e-87	0.270425	0.762	0.394	2.59906e-83
Plagl1	7.04463e-110	0.269849	0.601	0.228	1.44957e-105
Cox7a2	5.37038e-111	0.268699	0.998	0.941	1.10506e-106
Dctpp1	2.56353e-105	0.265535	0.832	0.427	5.27497e-101
Ryr2	3.2026e-83	0.265158	0.59	0.26	6.58998e-79
Uqcrc2	6.11183e-73	0.265037	0.945	0.631	1.25763e-68
Selenoh	1.73177e-72	0.264629	0.938	0.637	3.56345e-68
Hadhb	2.74485e-92	0.262849	0.7	0.337	5.64807e-88
Palld	1.08984e-89	0.260612	0.739	0.383	2.24257e-85
Hey2	3.52253e-105	0.259806	0.431	0.114	7.24832e-101
Pdlim5	5.06905e-88	0.259353	0.838	0.459	1.04306e-83
Srsf2	5.64976e-96	0.258429	0.817	0.419	1.16255e-91
Lsm4	1.32488e-79	0.256902	0.945	0.649	2.7262e-75
Ndufs6	1.64358e-68	0.256772	0.978	0.764	3.382e-64
Cyc1	1.65277e-74	0.256339	0.974	0.709	3.40091e-70
Ndufb8	3.36099e-75	0.25496	0.992	0.85	6.91592e-71
Canx	3.48664e-83	0.253901	0.863	0.479	7.17445e-79
Retreg1	5.27755e-93	0.252074	0.412	0.119	1.08596e-88

## Sheet: CM III
gene	p_val	avg_logFC	pct.1	pct.2	p_val_adj
Cited1	1.36383e-07	0.92615	0.365	0.364	0.0280635
Myl2	1.49411e-149	0.781224	0.975	0.846	3.07443e-145
Smpx	5.84777e-38	0.738076	0.715	0.759	1.20329e-33
Hopx	4.46286e-09	0.635247	0.538	0.666	9.18324e-05
Gyg1	8.69388e-08	0.600261	0.211	0.389	0.00178894
Atp5e	3.1496e-111	0.529203	0.973	0.971	6.48092e-107
Tpt1	6.42997e-136	0.523769	0.991	0.99	1.32309e-131
Rpl12	1.0118e-82	0.51805	0.934	0.971	2.08198e-78
Rps2	2.26476e-157	0.514308	0.993	0.996	4.6602e-153
Bola3	8.14833e-07	0.498367	0.587	0.814	0.0167668
Rps12	1.72932e-116	0.497007	0.987	0.985	3.55843e-112
Gyg2	4.86563e-49	0.486811	0.922	0.935	1.0012e-44
Pebp1	2.6271e-06	0.478186	0.589	0.837	0.0540579
Ftl1	6.93675e-25	0.468935	0.716	0.887	1.42737e-20
Rps23	6.9315e-96	0.467477	0.956	0.983	1.4263e-91
Fth1	6.51881e-68	0.464739	0.962	0.977	1.34138e-63
Sh3bgr	1.1769e-13	0.453021	0.676	0.824	2.42171e-09
Ndufc1	1.52743e-62	0.44837	0.922	0.962	3.14299e-58
Rpl10	5.20506e-70	0.439145	0.911	0.962	1.07104e-65
Rpl32	1.80716e-96	0.4389	0.99	0.994	3.7186e-92
Dstn	2.57676e-40	0.438392	0.857	0.933	5.30221e-36
Cox7a2l	9.15579e-11	0.438023	0.629	0.86	1.88399e-06
Rpsa	4.84751e-104	0.437684	0.992	0.992	9.97471e-100
Rpl17	3.31391e-45	0.421275	0.867	0.955	6.81904e-41
Atp5g1	1.85457e-63	0.421162	0.962	0.961	3.81616e-59
Myl4	8.89053e-78	0.418719	0.992	0.942	1.8294e-73
Atp5j	1.17275e-68	0.417961	0.927	0.958	2.41317e-64
Hmgn3	4.4432e-08	0.417544	0.257	0.47	0.000914277
Tpm1	3.75811e-101	0.416501	0.992	0.991	7.73306e-97
Rpl15	6.68691e-116	0.414189	0.995	0.99	1.37596e-111
Rps4x	1.31523e-123	0.412193	0.993	0.995	2.70635e-119
Slc25a4	2.0543e-69	0.402884	0.973	0.97	4.22713e-65
Gng5	3.98161e-90	0.400219	0.978	0.99	8.19297e-86
Ybx1	2.87316e-08	0.395707	0.637	0.872	0.000591209
Atp5h	1.70101e-46	0.395505	0.922	0.953	3.50016e-42
Rps13	5.25226e-72	0.394481	0.953	0.982	1.08076e-67
Rplp1	4.80531e-48	0.393643	0.887	0.957	9.88788e-44
Rpl29	2.56433e-35	0.390818	0.818	0.946	5.27663e-31
Rps7	1.7923e-106	0.390486	0.991	0.995	3.68801e-102
Rps24	6.3199e-135	0.390323	0.999	0.998	1.30045e-130
Rpl7	6.2425e-56	0.38771	0.921	0.975	1.28452e-51
Atp5k	2.39833e-46	0.383865	0.909	0.951	4.93504e-42
Rtraf	2.35352e-07	0.383298	0.628	0.863	0.00484283
Cycs	1.92562e-54	0.381579	0.966	0.975	3.96235e-50
Rps8	8.05569e-118	0.373488	0.999	0.998	1.65762e-113
Rps20	6.89518e-118	0.371549	0.995	0.999	1.41882e-113
Oaz1	1.50185e-33	0.370806	0.863	0.944	3.09035e-29
Fitm11	1.79398e-08	0.365454	0.237	0.436	0.000369148
Rpl8	5.31263e-42	0.363087	0.895	0.97	1.09318e-37
Rpl13	1.22702e-57	0.361329	0.958	0.982	2.52485e-53
Rpl41	4.0827e-108	0.360957	1	0.999	8.40098e-104
Tnnt2	2.86591e-33	0.359116	0.951	0.963	5.89719e-29
Rpl31	1.02416e-49	0.358554	0.901	0.968	2.10742e-45
Rps3a1	1.00202e-120	0.357824	0.997	1	2.06185e-116
Rpl18a	2.66671e-54	0.357134	0.938	0.981	5.48729e-50
Rpl26	1.48216e-62	0.357006	0.957	0.979	3.04983e-58
Atp5o	4.1423e-58	0.353937	0.962	0.97	8.5236e-54
Rplp0	1.80249e-26	0.353188	0.85	0.943	3.70899e-22
Rpl35	8.60423e-53	0.352477	0.947	0.982	1.77049e-48
Rpl23a	4.51139e-54	0.352392	0.952	0.981	9.28308e-50
Sms	8.28754e-10	0.348618	0.352	0.677	1.70533e-05
Nol7	7.84307e-08	0.347821	0.388	0.725	0.00161387
Selenow	1.69968e-15	0.345038	0.732	0.914	3.49743e-11
Mrpl42	8.453e-13	0.343079	0.736	0.902	1.73937e-08
Ndufb2	6.08851e-10	0.341446	0.698	0.877	1.25283e-05
Rps15a	4.37394e-69	0.339449	0.975	0.99	9.00026e-65
Crip2	1.65644e-22	0.339193	0.879	0.921	3.40845e-18
Rpl7a	3.30499e-39	0.338314	0.919	0.972	6.80069e-35
2010107E04Rik	4.21074e-44	0.337639	0.964	0.971	8.66444e-40
Rps25	3.92159e-45	0.337054	0.962	0.973	8.06945e-41
Rps9	2.81991e-43	0.336907	0.909	0.962	5.80253e-39
Dph3	3.20748e-12	0.334745	0.318	0.637	6.60004e-08
Sumo2	1.33435e-17	0.333185	0.755	0.915	2.74568e-13
Tmsb10	8.013e-44	0.333153	0.983	0.995	1.64883e-39
Rpl34	3.81443e-73	0.332366	0.982	0.992	7.84895e-69
Rps27a	4.41847e-107	0.331852	1	0.999	9.09189e-103
Atp5f1	4.93124e-31	0.331251	0.863	0.934	1.0147e-26
Uqcrfs1	7.76253e-18	0.330786	0.728	0.905	1.5973e-13
Fkbp1a	4.71451e-10	0.32962	0.704	0.894	9.70105e-06
Rpl27a	2.2131e-69	0.32881	0.99	0.992	4.5539e-65
Rps15	1.32008e-49	0.328808	0.936	0.976	2.71632e-45
Rpl6	6.14344e-80	0.327515	0.983	0.996	1.26414e-75
Bex4	1.97897e-06	0.3245	0.697	0.863	0.0407213
Rpl21	3.25885e-46	0.322417	0.9	0.975	6.70574e-42
Rpl28	1.87338e-50	0.322186	0.971	0.991	3.85486e-46
Uchl3	9.36279e-16	0.320636	0.316	0.657	1.92658e-11
Eef1a1	5.10807e-42	0.317373	0.961	0.991	1.05109e-37
Rps11	2.02375e-75	0.316782	0.995	0.993	4.16428e-71
Fam92a	1.41327e-19	0.31562	0.208	0.483	2.90809e-15
Rpl19	6.23084e-67	0.314696	0.967	0.987	1.28212e-62
Apobec2	5.78188e-14	0.312928	0.315	0.633	1.18974e-09
Rpl23	4.43245e-88	0.311671	0.997	0.996	9.12065e-84
Ppp1r1a	2.23974e-18	0.30866	0.258	0.57	4.6087e-14
Fam96a	8.07645e-08	0.307952	0.405	0.746	0.00166189
Aes	6.27405e-08	0.307833	0.393	0.747	0.00129101
Rpl14	7.37728e-21	0.30743	0.789	0.939	1.51802e-16
Mdh1	3.41659e-20	0.305671	0.908	0.949	7.03032e-16
Rpl36a	8.92677e-49	0.305206	0.967	0.988	1.83686e-44
Rrm2	1.88352e-06	0.303486	0.197	0.33	0.0387573
Csrp3	5.5921e-13	0.303297	0.859	0.895	1.15069e-08
Hcfc1r1	5.96909e-07	0.302491	0.701	0.891	0.0122826
Calm3	7.56464e-15	0.297964	0.318	0.659	1.55658e-10
Myl3	6.74952e-46	0.297022	1	0.96	1.38885e-41
Tmem126a	4.18582e-18	0.296349	0.294	0.637	8.61317e-14
Rpl11	1.50419e-55	0.292134	0.982	0.992	3.09516e-51
Uqcrq	4.09571e-27	0.291782	0.911	0.961	8.42774e-23
Rps19	7.77234e-21	0.291334	0.858	0.957	1.59931e-16
Ift43	1.47126e-14	0.291215	0.311	0.649	3.02741e-10
Adprhl1	4.4568e-16	0.289602	0.19	0.422	9.17077e-12
Hmgn1	9.33104e-07	0.288659	0.697	0.906	0.0192005
Rpl24	1.32671e-52	0.288162	0.973	0.987	2.72997e-48
Rpl3	6.17353e-24	0.287816	0.842	0.956	1.27033e-19
Eif5a	4.09268e-06	0.286886	0.695	0.898	0.0842151
1110008P14Rik	6.27906e-19	0.286542	0.201	0.466	1.29204e-14
Ndufs8	2.87158e-11	0.285261	0.363	0.707	5.90884e-07
Lsm2	2.72006e-13	0.284395	0.312	0.622	5.59706e-09
Chchd3	9.25279e-17	0.284125	0.285	0.613	1.90395e-12
Ost4	6.50377e-11	0.283884	0.728	0.915	1.33828e-06
Rpl10a	1.39363e-28	0.283294	0.914	0.968	2.86766e-24
Uqcr10	1.67582e-23	0.282067	0.915	0.95	3.44834e-19
Chchd2	9.32211e-38	0.281374	0.973	0.982	1.91821e-33
Ndufa11	7.2262e-11	0.281152	0.736	0.899	1.48694e-06
Rps21	1.36983e-55	0.280914	0.993	0.996	2.8187e-51
Atp5d	1.71777e-20	0.280778	0.816	0.937	3.53465e-16
Cript	7.34262e-25	0.280749	0.25	0.603	1.51089e-20
Ndufs7	6.34593e-07	0.279488	0.669	0.869	0.013058
Fkbp3	1.97721e-06	0.279129	0.682	0.892	0.0406851
Dctpp11	1.21093e-10	0.276544	0.331	0.626	2.49173e-06
Tnnc1	1.50454e-24	0.276234	0.97	0.953	3.09589e-20
Ppia	2.39522e-61	0.27507	0.997	0.997	4.92865e-57
Rps16	1.10603e-63	0.275055	0.987	0.996	2.27588e-59
Pts	4.36512e-20	0.274835	0.172	0.419	8.9821e-16
Rps17	4.46888e-26	0.273328	0.908	0.97	9.19562e-22
Rpl5	5.45697e-23	0.27299	0.882	0.967	1.12288e-18
Rplp2	4.36589e-49	0.272676	0.966	0.987	8.98368e-45
Rpl22	7.95242e-31	0.272213	0.917	0.975	1.63637e-26
Rps26	3.90811e-59	0.271293	0.988	0.996	8.04172e-55
Mrpl361	1.59455e-06	0.269846	0.417	0.731	0.0328112
Trappc1	1.07514e-15	0.269106	0.324	0.679	2.21232e-11
Taf10	7.88369e-13	0.268011	0.357	0.716	1.62223e-08
Actc1	1.84927e-34	0.267942	1	0.98	3.80525e-30
Rps5	5.07136e-19	0.266017	0.862	0.959	1.04353e-14
Hras	4.11571e-23	0.265496	0.216	0.518	8.4689e-19
Mrps7	5.65312e-23	0.265441	0.206	0.502	1.16324e-18
Iscu	1.66776e-24	0.264974	0.251	0.602	3.43176e-20
Sp3os	7.6619e-19	0.26397	0.185	0.431	1.57659e-14
Rpl36	4.90018e-35	0.263913	0.956	0.986	1.00831e-30
Idh2	1.47394e-06	0.26339	0.707	0.903	0.0303292
Ak1	3.59609e-22	0.26317	0.198	0.48	7.39966e-18
Mrps15	1.30473e-20	0.262626	0.283	0.629	2.68475e-16
Ppp1ca	2.21172e-12	0.261942	0.371	0.737	4.55106e-08
Lamtor2	7.74415e-14	0.261861	0.38	0.76	1.59351e-09
Rpl30	6.36669e-46	0.260084	0.99	0.995	1.31007e-41
Rps6	4.59129e-10	0.259721	0.743	0.93	9.4475e-06
Eef1b2	8.98666e-15	0.259557	0.832	0.957	1.84919e-10
Ube2s	7.68121e-09	0.257263	0.413	0.743	0.000158056
Rack1	9.06041e-11	0.257118	0.738	0.93	1.86436e-06
Ywhaq	3.47873e-06	0.256859	0.461	0.822	0.0715818
Pkig	1.58078e-17	0.256747	0.314	0.664	3.25278e-13
Dut	8.17339e-08	0.256415	0.375	0.662	0.00168184
Glrx3	2.3069e-10	0.256396	0.385	0.748	4.74692e-06
Ccnb2	1.42063e-10	0.25568	0.145	0.292	2.92323e-06
Tnni11	2.02417e-12	0.255611	0.892	0.924	4.16513e-08
Arpc5l	3.38391e-25	0.255018	0.227	0.555	6.96308e-21
Tsc22d3	3.31229e-22	0.254884	0.201	0.484	6.81569e-18
Denr	4.95707e-15	0.254316	0.322	0.663	1.02002e-10
Uba52	1.83864e-24	0.253947	0.91	0.976	3.78337e-20
Dynll1	8.98135e-07	0.25365	0.776	0.929	0.0184809
Usmg5	1.30614e-22	0.253648	0.914	0.967	2.68764e-18
Drap1	8.07918e-24	0.253128	0.245	0.581	1.66245e-19
Mllt3	4.14562e-13	0.252491	0.121	0.279	8.53044e-09
Glrx5	1.05475e-10	0.252457	0.382	0.739	2.17037e-06
Vdac2	5.72148e-12	0.250131	0.742	0.919	1.17731e-07
Pomp	1.70667e-10	0.250111	0.395	0.757	3.51182e-06
