# Supplementary material for: Single Cell Sequencing Reveals Mechanisms of Persistent Truncus Arteriosus Formation after PDGFRα and PDGFRβ Double Knockout in Cardiac Neural Crest Cells
Source: Genes (Basel). 2022 Sep 23;13(10):1708. doi: 10.3390/genes13101708 (PMC9601305; doi:10.3390/genes13101708)
Supplement: Supplementary file 1 [file genes-13-01708-s001.zip › Table S7. Differentially Expressed Genes between DKO and control group of CM I, II and III cluster. Related to Figure 4.xlsx]

## Sheet: CM I
Table S4. Differentially expressed genes between DKO and control group of CM I, II and III cluster. Related to Figure 4.
gene	p_val	avg_logFC	pct.1	pct.2	p_val_adj
Gm42418	4.73e-26	1.00996	0.192	0.437	9.73e-22
Hspa1a	1.28e-07	0.841627	0.103	0.2	0.00262385
Hspa1b	2.12e-09	0.75411	0.051	0.153	4.37e-05
Malat1	3.14e-66	0.738799	0.998	0.996	6.46e-62
Mest	1.15e-08	0.673378	0.133	0.246	0.000235633
Uba52	7.49e-117	0.624902	0.987	0.953	1.54e-112
Nppb	3.02e-05	0.624881	0.257	0.33	0.621505
Hsp90aa1	3.66e-13	0.611336	0.907	0.78	7.54e-09
Mt1	5.74e-10	0.591905	0.733	0.731	1.18e-05
Hk2	2.6e-17	0.589661	0.747	0.693	5.36e-13
Slc2a3	1.83e-13	0.588728	0.309	0.444	3.77e-09
Krt18	0.545329	0.547776	0.438	0.39	1
Gm11808	1.37e-30	0.53861	0.867	0.75	2.83e-26
Pam	1.49e-13	0.526817	0.901	0.867	3.06e-09
Nexn	1.55e-32	0.509884	0.924	0.831	3.2e-28
Slc38a2	5.62e-10	0.496015	0.844	0.728	1.16e-05
Ktn1	5.9e-11	0.485581	0.722	0.659	1.21e-06
Ccnd2	3.02e-07	0.482968	0.425	0.496	0.00621237
Cryab	0.310561	0.474599	0.958	0.85	1
Ttn	3.58e-15	0.467515	0.88	0.771	7.38e-11
Actb	1.56e-15	0.44458	0.985	0.964	3.22e-11
Col1a1	0.450751	0.44092	0.206	0.204	1
Tagln2	0.0219099	0.43892	0.455	0.464	1
Spry2	0.0466246	0.424619	0.686	0.621	1
Snhg6	4.03e-10	0.421406	0.844	0.721	8.29e-06
Vcan	0.000403181	0.419009	0.606	0.589	1
Nme2	2.43e-07	0.41676	0.798	0.692	0.00500388
Bnip3	4.03e-16	0.405187	0.884	0.812	8.3e-12
Pcgf5	0.00360361	0.403451	0.575	0.522	1
Krt19	1.85e-06	0.403316	0.328	0.411	0.0380014
Nsa2	2.63e-12	0.398698	0.861	0.732	5.42e-08
Ncl	0.000345612	0.391087	0.684	0.612	1
Eif2s3y	4.72e-40	0.388405	0	0.296	9.72e-36
Rpl13a	1.4e-08	0.38835	0.819	0.701	0.000287625
Rack1	4.51e-31	0.381408	0.977	0.87	9.29e-27
Igf2r	4.2e-10	0.379432	0.941	0.85	8.65e-06
Vegfa	1.77e-05	0.377871	0.495	0.516	0.363266
Ero1l	0.00052587	0.370193	0.436	0.459	1
Hspb1	0.669624	0.369252	0.973	0.927	1
Ogdhl	1.24e-06	0.369165	0.124	0.219	0.0256128
Myh9	0.000274808	0.361608	0.145	0.215	1
Myadm	0.175141	0.359406	0.718	0.602	1
mt-Nd6	0.0447941	0.35929	0.688	0.606	1
Eif2s2	8.59e-13	0.343442	0.956	0.793	1.77e-08
Lgals3	3.45e-07	0.343307	0.059	0.144	0.00710811
Lmo4	0.0140367	0.341869	0.545	0.519	1
Cdkn1a	0.00454557	0.338859	0.299	0.332	1
Fxr1	0.00075087	0.336524	0.672	0.603	1
Hist1h2ae	0.413373	0.335764	0.221	0.226	1
Npm1	2.11e-29	0.332005	0.994	0.909	4.34e-25
Midn	0.154464	0.33048	0.366	0.362	1
Eef1a1	6.25e-48	0.318563	1	0.978	1.29e-43
Prpf4b	0.000567366	0.313838	0.44	0.469	1
Hspe1	9.17e-12	0.307157	0.987	0.905	1.89e-07
Pabpc1	0.00317092	0.306268	0.888	0.717	1
Prrc2c	0.136433	0.304382	0.543	0.503	1
Hspd1	0.000774119	0.304298	0.954	0.805	1
Soat1	4.75e-06	0.3024	0.179	0.278	0.0978349
Cited2	0.727593	0.300326	0.76	0.612	1
Mbnl2	0.855202	0.300132	0.484	0.409	1
Cox8b	0.706208	0.298527	0.459	0.406	1
Sh3glb1	0.0155737	0.294629	0.832	0.684	1
Ankrd1	7.09e-07	0.294288	0.851	0.873	0.0145941
Ddx3y	7.45e-31	0.291015	0	0.236	1.53e-26
Acta1	0.0573999	0.290153	0.501	0.504	1
Igfbp5	0.402308	0.289657	0.669	0.558	1
Rps28	2.41e-39	0.2894	1	0.979	4.96e-35
Igf2bp2	0.0276891	0.289129	0.364	0.374	1
Serbp1	1.39e-12	0.288959	0.954	0.816	2.87e-08
Slc2a1	0.00238584	0.287573	0.819	0.731	1
Ehd4	0.00891951	0.286441	0.305	0.344	1
Kcnq1ot1	0.190026	0.286059	0.474	0.45	1
Rpl5	1.05e-34	0.282669	0.998	0.924	2.17e-30
Rpl23a	4.84e-37	0.282303	0.998	0.956	9.96e-33
Hnrnpl	0.359564	0.281272	0.672	0.554	1
Lmod3	0.000638097	0.280337	0.198	0.264	1
mt-Nd5	6.42e-17	0.280297	0.985	0.905	1.32e-12
Loxl2	0.279186	0.278687	0.627	0.539	1
Rpl38	1.86e-52	0.276967	1	0.994	3.83e-48
Kdm6b	0.374789	0.275937	0.48	0.453	1
Rpl35	1.53e-31	0.2726	0.998	0.962	3.15e-27
Eif3c	0.0584105	0.269949	0.771	0.641	1
Ttc3	0.280575	0.26835	0.583	0.512	1
Paip1	0.00270874	0.267645	0.581	0.432	1
Epb41l4aos	0.0146277	0.26738	0.402	0.42	1
Cox4i2	0.0884754	0.266178	0.581	0.545	1
Rpl6	4.71e-37	0.264997	1	0.992	9.7e-33
Csnk2a1	0.00208528	0.264179	0.432	0.454	1
Rps7	5.83e-42	0.262438	1	0.989	1.2e-37
H2-Ab1	0.0806404	0.261529	0.442	0.442	1
Nars	0.372795	0.260451	0.423	0.384	1
Srrm1	0.110763	0.258666	0.562	0.526	1
Gm15283	1.9e-05	0.258452	0.194	0.278	0.391626
P4ha1	0.25529	0.257274	0.463	0.438	1
Rpl37	1.32e-48	0.257163	1	0.998	2.71e-44
mt-Atp8	0.463884	0.256836	0.564	0.504	1
Dync1i2	0.490796	0.254403	0.663	0.557	1
Gja1	9e-05	0.254403	0.103	0.173	1
Ubap2l	0.572894	0.253476	0.495	0.433	1
Higd1a	4.13e-11	0.252706	0.987	0.91	8.5e-07
Hnrnpc	0.385589	0.252107	0.644	0.553	1
Arhgap5	0.624265	0.251927	0.556	0.487	1
Nebl	0.166109	0.250396	0.768	0.611	1
Dynll1	7.27e-12	-0.25031	0.987	0.856	1.5e-07
Cd59a	4.9e-27	-0.250854	0.488	0.222	1.01e-22
Stmn1	1.98e-21	-0.251272	0.811	0.536	4.07e-17
Tspo	5.25e-34	-0.251854	0.754	0.415	1.08e-29
Trappc2l	7.64e-35	-0.252008	0.813	0.464	1.57e-30
Glo1	4.95e-36	-0.252104	0.895	0.576	1.02e-31
Taldo1	3.52e-39	-0.252803	0.821	0.496	7.24e-35
Tnnt2	2.75e-15	-0.253455	0.968	0.925	5.66e-11
Elob	1.77e-38	-0.253605	0.998	0.887	3.64e-34
Cd81	8.11e-28	-0.255791	0.992	0.851	1.67e-23
Ywhah	7.09e-36	-0.256403	0.88	0.571	1.46e-31
Gm45716	6.6e-27	-0.256434	0.745	0.455	1.36e-22
Uchl1	5.91e-36	-0.25789	0.76	0.426	1.22e-31
Ak1	7.45e-38	-0.258591	0.615	0.278	1.53e-33
Mgst3	1.14e-27	-0.260397	0.88	0.605	2.35e-23
Itm2b	1.07e-20	-0.260975	0.981	0.747	2.19e-16
Apobec2	1.66e-32	-0.261174	0.741	0.426	3.42e-28
H2afz	4.29e-08	-0.261182	0.994	0.922	0.000883323
Cenpx	5.3e-39	-0.261505	0.688	0.343	1.09e-34
Atcayos	2.72e-26	-0.262667	0.707	0.402	5.59e-22
Psmb3	1.31e-29	-0.262791	0.964	0.708	2.7e-25
Mrpl36	3.01e-31	-0.262999	0.819	0.506	6.2e-27
Arf5	8.62e-37	-0.263555	0.92	0.607	1.77e-32
Maged2	3.21e-42	-0.264243	0.608	0.264	6.61e-38
Tmem160	1.36e-40	-0.264261	0.672	0.322	2.8e-36
Serf1	1.28e-34	-0.264591	0.836	0.5	2.63e-30
Lamtor4	6.76e-41	-0.266539	0.838	0.494	1.39e-36
Pla2g16	4.25e-30	-0.271746	0.775	0.482	8.74e-26
Tubb2a	1.15e-27	-0.272298	0.495	0.227	2.36e-23
Bex3	3.08e-17	-0.274487	0.996	0.861	6.33e-13
Cenpa	3.33e-10	-0.276264	0.411	0.256	6.85e-06
Crip1	7.42e-16	-0.276312	0.899	0.664	1.53e-11
Tpm1	4.59e-21	-0.276969	0.992	0.983	9.45e-17
Htra1	1.95e-47	-0.277806	0.526	0.18	4.01e-43
1810037I17Rik	8.4e-28	-0.27788	0.956	0.698	1.73e-23
Oaz1	1.62e-39	-0.281441	0.992	0.871	3.34e-35
Tsc22d3	2.27e-46	-0.281515	0.615	0.26	4.67e-42
Crip2	9.14e-21	-0.281993	0.952	0.833	1.88e-16
Otud1	4.17e-35	-0.282379	0.512	0.215	8.59e-31
Dnajb11	4.43e-40	-0.283394	0.587	0.253	9.11e-36
Hmgn3	3e-31	-0.283907	0.516	0.229	6.17e-27
Tmem14c	4.01e-37	-0.284248	0.92	0.603	8.25e-33
Pdlim7	1.26e-29	-0.285524	0.92	0.632	2.6e-25
Myl9	1.15e-17	-0.285658	0.966	0.833	2.38e-13
Actr3	9.99e-31	-0.28689	0.895	0.58	2.06e-26
Dusp1	4.41e-40	-0.28805	0.621	0.268	9.07e-36
D8Ertd738e	6.32e-43	-0.293023	0.937	0.629	1.3e-38
Igfbp7	8.09e-17	-0.293539	0.488	0.274	1.66e-12
mt-Co2	3.44e-43	-0.294267	1	0.999	7.07e-39
Calm3	2.3e-42	-0.294837	0.825	0.451	4.72e-38
Gamt	4.4e-40	-0.29566	0.522	0.201	9.05e-36
Pclaf	2.49e-08	-0.296508	0.4	0.259	0.000512688
Calm2	1.16e-30	-0.298472	0.943	0.667	2.39e-26
Eno3	3.19e-30	-0.301168	0.834	0.571	6.57e-26
Gnb2	1.14e-43	-0.303519	0.893	0.519	2.35e-39
Atpif1	3.67e-35	-0.304054	0.994	0.901	7.54e-31
Mtch1	3.23e-48	-0.306375	0.792	0.404	6.64e-44
Tagln	0.000461554	-0.307171	0.952	0.829	1
Hspa5	1.93e-30	-0.310847	0.912	0.605	3.98e-26
Ier3	1.01e-25	-0.313266	0.714	0.432	2.08e-21
Ndufb2	2.51e-33	-0.31497	0.968	0.739	5.17e-29
Tsix	3.49e-105	-0.316119	0.354	0.001	7.18e-101
Ctgf	2.46e-22	-0.317231	0.716	0.45	5.07e-18
Sparc	5.66e-30	-0.3215	0.983	0.811	1.16e-25
Cox6a2	0.00193174	-0.325782	0.766	0.746	1
Mgp	0.0757664	-0.328353	0.269	0.236	1
Gmpr	4.02e-43	-0.328725	0.646	0.3	8.27e-39
mt-Nd1	3.28e-54	-0.329439	1	0.98	6.75e-50
Rrm2	1.36e-09	-0.330963	0.301	0.172	2.79e-05
Josd2	1.24e-49	-0.338837	0.724	0.344	2.56e-45
Pgam2	1.44e-24	-0.341247	0.912	0.657	2.96e-20
Itm2a	2.15e-29	-0.352184	0.931	0.656	4.42e-25
mt-Atp6	3.73e-70	-0.355553	1	0.995	7.67e-66
Smdt1	2.55e-47	-0.355828	0.968	0.716	5.25e-43
Cdkn1c	9.39e-29	-0.358454	0.884	0.611	1.93e-24
Ubl5	2.37e-41	-0.359824	0.981	0.737	4.87e-37
Ppp1r14c	1.77e-47	-0.36106	0.712	0.331	3.64e-43
Prdx1	1.15e-44	-0.36626	0.998	0.806	2.37e-40
Sfrp1	1.35e-20	-0.371584	0.876	0.652	2.77e-16
Tcap	1.27e-21	-0.376361	0.648	0.399	2.62e-17
Mhrt	8.16e-48	-0.376819	0.545	0.195	1.68e-43
Ramp1	6.36e-53	-0.378245	0.476	0.142	1.31e-48
Tnnc1	1.66e-43	-0.396613	0.971	0.9	3.42e-39
Cav3	2.94e-41	-0.39691	0.657	0.295	6.05e-37
Atox1	3.12e-51	-0.398438	0.968	0.672	6.41e-47
Gadd45g	6.39e-24	-0.40379	0.733	0.477	1.32e-19
Cst3	3.5e-28	-0.421163	0.985	0.89	7.21e-24
Tuba1a	1.4e-45	-0.437136	0.905	0.547	2.89e-41
H2afv	3.27e-42	-0.447587	0.966	0.656	6.73e-38
Gm10076	4.11e-70	-0.482538	0.968	0.697	8.47e-66
Cirbp	1.36e-76	-0.496968	0.884	0.443	2.81e-72
Acta2	4.78e-20	-0.54632	0.964	0.833	9.83e-16
Tnni1	3.18e-92	-0.595477	0.981	0.832	6.54e-88
Csrp2	5.67e-36	-0.6121	0.996	0.83	1.17e-31
5430431A17Rik	2.24e-61	-0.720871	0.905	0.584	4.61e-57
Xist	0	-1.39738	0.893	0.001	0

## Sheet: CM II
gene	p_val	avg_logFC	pct.1	pct.2	p_val_adj
Gm42418	4.76e-42	1.3793	0.164	0.518	9.8e-38
Mt1	1.04e-30	0.900906	0.638	0.831	2.14e-26
Malat1	1.24e-53	0.804174	0.995	0.996	2.56e-49
Hk2	1.88e-40	0.778172	0.489	0.761	3.87e-36
Bnip3	8.68e-40	0.763416	0.734	0.894	1.79e-35
Ttn	4.72e-37	0.612229	0.977	0.953	9.71e-33
Nexn	6.02e-45	0.600945	0.975	0.949	1.24e-40
Igf2r	3.45e-26	0.570614	0.944	0.957	7.1e-22
Ccnd2	1.56e-15	0.539674	0.709	0.749	3.21e-11
Ddah1	4.65e-20	0.526918	0.468	0.655	9.56e-16
Higd1a	1.11e-26	0.523184	0.975	0.949	2.29e-22
Fam162a	3.47e-46	0.519362	0.981	0.965	7.15e-42
Actb	2.61e-14	0.50167	0.966	0.965	5.37e-10
Ankrd1	1.31e-11	0.496356	0.935	0.961	2.69e-07
H2-Ab1	2.42e-19	0.489434	0.097	0.298	4.97e-15
Ktn1	1.85e-16	0.457065	0.728	0.765	3.81e-12
Gm11808	4.31e-31	0.450861	0.914	0.91	8.87e-27
Bnip3l	8.85e-12	0.445867	0.799	0.765	1.82e-07
Nme2	1.77e-25	0.443135	0.862	0.851	3.63e-21
Alpk3	1.31e-12	0.441759	0.427	0.569	2.7e-08
Uba52	4.36e-68	0.438247	0.996	0.984	8.97e-64
Nppb	0.0360526	0.437395	0.465	0.494	1
Cox4i2	1.12e-23	0.431887	0.09	0.318	2.31e-19
Vcan	9.48e-16	0.430794	0.671	0.769	1.95e-11
Prelid2	2.01e-13	0.417222	0.541	0.655	4.14e-09
Myadm	2.44e-10	0.414427	0.582	0.659	5.01e-06
Mif	3.07e-38	0.414279	0.997	1	6.32e-34
Eif3c	4.72e-12	0.412983	0.757	0.761	9.72e-08
Nebl	1.16e-14	0.40908	0.871	0.824	2.38e-10
Spry2	3.4e-12	0.407078	0.724	0.773	7e-08
Prrc2c	7.01e-11	0.405253	0.512	0.624	1.44e-06
Slc38a2	1.5e-10	0.400249	0.805	0.776	3.08e-06
Ncl	1.32e-11	0.399711	0.793	0.773	2.71e-07
Plod2	4.03e-12	0.390731	0.235	0.416	8.3e-08
Bsg	1.34e-26	0.388847	0.992	0.976	2.75e-22
mt-Atp8	6.88e-13	0.388132	0.628	0.682	1.42e-08
Vegfa	1.01e-11	0.387066	0.361	0.525	2.08e-07
Id2	1.3e-05	0.384303	0.615	0.639	0.268496
Eif2s3y	1.48e-86	0.382915	0	0.353	3.05e-82
Tgfb2	1.01e-07	0.381995	0.402	0.518	0.00208832
Gpx3	1.73e-08	0.376913	0.85	0.82	0.000356825
Top2a	0.000638847	0.37598	0.273	0.345	1
mt-Nd6	5.93e-09	0.372759	0.55	0.631	0.000122043
Pfkp	4.7e-08	0.366398	0.43	0.525	0.000966426
Nsa2	2.69e-18	0.363388	0.887	0.863	5.53e-14
Slc2a3	9.67e-15	0.363101	0.13	0.31	1.99e-10
Pgk1	8.37e-26	0.362761	0.992	0.976	1.72e-21
Hsp90b1	1.04e-11	0.354013	0.959	0.922	2.14e-07
Ldha	4.38e-31	0.352702	0.996	0.996	9.02e-27
Egln1	3.22e-07	0.345055	0.481	0.561	0.00662621
Kdm6b	8.31e-06	0.342248	0.431	0.506	0.170929
Atp1b1	3.73e-17	0.341478	0.972	0.941	7.67e-13
Ogdhl	3.39e-14	0.338304	0.127	0.306	6.98e-10
Rack1	7.92e-26	0.338082	0.975	0.949	1.63e-21
mt-Nd5	1.44e-16	0.3367	0.984	0.945	2.96e-12
Hnrnpl	2.46e-07	0.336696	0.702	0.722	0.00505389
Rpl13a	1.69e-13	0.332122	0.832	0.796	3.47e-09
Set	5.61e-13	0.325023	0.933	0.902	1.15e-08
Kcne1	9.22e-07	0.323105	0.696	0.69	0.0189715
Aldoa	4.3e-30	0.320202	0.995	0.992	8.84e-26
Itga1	3.39e-08	0.317074	0.285	0.412	0.000696844
Pttg1	0.283282	0.313017	0.752	0.6	1
Eno1	3.51e-13	0.312535	0.949	0.922	7.22e-09
Prpf4b	3.91e-08	0.311695	0.457	0.561	0.000804986
Lmod3	0.000826171	0.309962	0.38	0.424	1
Loxl2	3.09e-11	0.30948	0.273	0.439	6.36e-07
Slc2a1	8.31e-06	0.308188	0.863	0.843	0.171019
Fabp5	4.92e-05	0.303685	0.609	0.643	1
Mgp	0.000110635	0.299093	0.068	0.137	1
Dag1	8.95e-05	0.292599	0.531	0.545	1
Eef1a1	9.01e-36	0.291289	0.999	1	1.85e-31
Eif2s2	3.79e-11	0.290495	0.959	0.902	7.81e-07
1810022K09Rik	5.4e-11	0.288726	0.907	0.824	1.11e-06
Krt19	2.22e-10	0.288687	0.199	0.361	4.56e-06
Khsrp	0.000515044	0.287909	0.342	0.404	1
Bri3	1.44e-09	0.287322	0.936	0.902	2.96e-05
Alkbh5	3.93e-07	0.286512	0.651	0.706	0.0080783
Mt2	7.89e-10	0.28649	0.085	0.212	1.62e-05
Csrp3	4.37e-11	0.285753	0.989	0.969	8.99e-07
Ero1l	1.26e-08	0.28499	0.25	0.4	0.000258931
Myh9	9.91e-06	0.280919	0.149	0.247	0.203997
Pbx1	1.28e-05	0.278675	0.511	0.553	0.262909
Hist1h2ae	0.0242061	0.276162	0.206	0.255	1
Id3	0.00854876	0.275016	0.232	0.29	1
Pcgf5	2.42e-05	0.274153	0.456	0.51	0.49816
Ndufa4l2	2.12e-09	0.273742	0.081	0.208	4.37e-05
Slc8a1	1.02e-11	0.271747	0.146	0.306	2.11e-07
Anxa2	0.00131137	0.268642	0.576	0.58	1
Mthfd2	0.0004708	0.267726	0.228	0.298	1
Scaf11	9.18e-07	0.267483	0.327	0.424	0.0188804
Hddc3	3.72e-13	0.266681	0.104	0.263	7.66e-09
Hnrnpul1	0.00094064	0.26633	0.297	0.361	1
Ncam1	1.62e-10	0.265121	0.175	0.333	3.33e-06
Atp1a1	6.58e-08	0.263147	0.857	0.796	0.00135481
Hes1	0.182871	0.26237	0.518	0.482	1
P4hb	0.00195858	0.261525	0.502	0.522	1
Actn4	3.75e-05	0.259566	0.482	0.525	0.772359
Apoe	2.95e-05	0.259338	0.215	0.318	0.606328
Upp1	3.03e-10	0.258079	0.159	0.314	6.23e-06
Rps28	2.73e-30	0.254933	1	1	5.61e-26
P4ha1	1.75e-07	0.253955	0.239	0.365	0.00359469
Pabpc1	6.12e-08	0.253344	0.925	0.855	0.0012596
Hp1bp3	0.0140627	0.252983	0.364	0.384	1
Paip1	0.0448502	0.252016	0.528	0.498	1
Tpr	0.000118643	0.25122	0.515	0.549	1
Igf2bp2	7.97e-05	0.25084	0.321	0.392	1
Gm45716	5.31e-12	-0.254468	0.855	0.6	1.09e-07
Tbca	4.12e-21	-0.254478	0.994	0.949	8.49e-17
Dbi	5.87e-18	-0.254927	0.985	0.898	1.21e-13
mt-Cytb	2.66e-21	-0.257096	1	1	5.47e-17
Dnajb11	2.09e-15	-0.257204	0.63	0.31	4.31e-11
Ndufs5	1.07e-18	-0.25739	0.986	0.906	2.2e-14
Mrpl33	1.08e-14	-0.25877	0.934	0.749	2.21e-10
Txnip	2.72e-14	-0.258982	0.46	0.188	5.6e-10
Selenom	9.61e-12	-0.25941	0.78	0.537	1.98e-07
Atp5h	9.41e-26	-0.265867	0.999	0.965	1.94e-21
Ndufb2	1.58e-19	-0.266037	0.989	0.914	3.26e-15
Arf5	1.69e-16	-0.275314	0.912	0.698	3.48e-12
Trappc2l	3.03e-15	-0.279865	0.834	0.557	6.24e-11
Uqcrb	4.22e-25	-0.280586	1	0.976	8.69e-21
Mylpf	1.08e-14	-0.280799	0.348	0.106	2.23e-10
Jund	4.17e-14	-0.284554	0.934	0.761	8.58e-10
Josd2	2.56e-18	-0.286671	0.799	0.502	5.27e-14
Prdx1	1.11e-23	-0.290736	0.994	0.945	2.29e-19
Ramp1	6.39e-19	-0.293046	0.507	0.2	1.31e-14
Atox1	2.92e-18	-0.294987	0.961	0.816	6.01e-14
Gamt	6.67e-18	-0.298239	0.54	0.22	1.37e-13
Cst3	2.45e-15	-0.304348	0.993	0.933	5.05e-11
Hspb3	4.99e-18	-0.308007	0.587	0.267	1.03e-13
Ppp1r14c	1.51e-20	-0.312678	0.831	0.486	3.11e-16
1810037I17Rik	1.61e-18	-0.313693	0.952	0.784	3.31e-14
Pla2g16	7.58e-21	-0.317262	0.679	0.318	1.56e-16
Myl1	2.51e-15	-0.322346	0.491	0.204	5.17e-11
Ier2	7.63e-21	-0.327463	0.639	0.286	1.57e-16
Fitm1	7.76e-18	-0.331054	0.729	0.388	1.6e-13
Cdkn1c	2.37e-13	-0.333205	0.957	0.792	4.89e-09
Ctgf	5.18e-14	-0.336758	0.767	0.482	1.07e-09
Mdk	1.45e-18	-0.347475	0.873	0.616	2.99e-14
Mhrt	7.34e-18	-0.354146	0.538	0.227	1.51e-13
Atf3	8.98e-17	-0.356891	0.615	0.302	1.85e-12
Trdn	3.09e-21	-0.361334	0.82	0.518	6.37e-17
Cirbp	3.47e-22	-0.371475	0.858	0.573	7.14e-18
Acta2	2.41e-10	-0.389785	0.952	0.878	4.95e-06
mt-Atp6	1.81e-49	-0.396296	0.999	1	3.72e-45
Gadd45g	5.81e-20	-0.421955	0.833	0.518	1.2e-15
Egr1	2.96e-23	-0.422473	0.418	0.082	6.08e-19
Smpx	1.99e-31	-0.525472	0.974	0.914	4.09e-27
Tnni1	2.76e-79	-0.543883	0.999	0.957	5.68e-75
Fos	2.12e-28	-0.568696	0.762	0.357	4.36e-24
Gm10076	1.26e-55	-0.574195	0.97	0.796	2.6e-51
Tcap	8.72e-37	-0.638978	0.911	0.612	1.79e-32
5430431A17Rik	6.59e-38	-0.641241	0.947	0.69	1.36e-33
Cited1	6.15e-16	-0.93925	0.628	0.373	1.27e-11
Xist	2.75e-95	-1.05368	0.82	0	5.66e-91

## Sheet: CM III
gene	p_val	avg_logFC	pct.1	pct.2	p_val_adj
Gm42418	5.95e-24	1.1168	0.089	0.388	1.23e-19
Nppb	4.74e-05	0.69983	0.205	0.324	0.976237
Bsg	5.15e-10	0.699388	0.305	0.515	1.06e-05
Nme2	8.46e-18	0.682819	0.325	0.621	1.74e-13
Hk2	1.2e-14	0.600746	0.074	0.278	2.46e-10
mt-Co1	1.96e-16	0.586163	0.682	0.926	4.02e-12
Rpl13a	3.83e-11	0.55125	0.309	0.537	7.89e-07
Ankrd1	2.15e-13	0.544004	0.651	0.858	4.43e-09
Gm11808	4.07e-12	0.541933	0.359	0.583	8.37e-08
Mt1	6.18e-11	0.534308	0.298	0.528	1.27e-06
Sars	9.13e-10	0.526269	0.076	0.23	1.88e-05
Malat1	5.6e-18	0.498547	0.257	0.602	1.15e-13
Bnip3	2.13e-12	0.497282	0.336	0.595	4.38e-08
mt-Nd2	7.37e-12	0.474055	0.623	0.851	1.52e-07
Hsp90aa1	1.35e-07	0.473889	0.288	0.469	0.00278212
Serpinh1	7.79e-07	0.458761	0.094	0.22	0.0160213
Oxct1	4.87e-08	0.456382	0.142	0.304	0.00100226
Nexn	1.61e-06	0.450023	0.364	0.531	0.0331148
Actb	1.3e-05	0.428213	0.434	0.599	0.267878
Plp2	1.27e-05	0.424517	0.118	0.236	0.260942
Fam162a	4.59e-15	0.420677	0.706	0.874	9.45e-11
Top2a	7.87e-06	0.418082	0.07	0.175	0.162001
Atp1b1	8.32e-06	0.404276	0.094	0.207	0.171226
Slc2a1	7.32e-06	0.400207	0.033	0.113	0.150708
Nsa2	6.47e-07	0.394201	0.357	0.54	0.0133057
Uba52	1.2e-18	0.393744	0.88	0.955	2.48e-14
Mif	6.37e-20	0.388996	0.943	0.997	1.31e-15
mt-Nd5	1.65e-08	0.380863	0.153	0.343	0.000340307
Eif2s3y	7.31e-14	0.379829	0	0.117	1.5e-09
Rpl4	3.92e-07	0.379721	0.525	0.667	0.00807406
Eif5b	1.25e-06	0.375012	0.109	0.239	0.0256254
Cyba	0.00387163	0.368787	0.083	0.146	1
Eif4b	0.00132599	0.362907	0.059	0.123	1
Hspd1	1.42e-07	0.359288	0.497	0.673	0.00292992
Myh6	1.43e-05	0.356573	0.129	0.252	0.29344
Upp1	6.18e-07	0.356081	0.033	0.126	0.0127112
Kif5b	2.66e-05	0.336236	0.176	0.307	0.547393
Tuba1b	8.96e-05	0.335821	0.486	0.615	1
Sfrp1	7.79e-06	0.332391	0.113	0.239	0.160308
Ctsl	5.54e-05	0.331836	0.05	0.133	1
Bex1	8.51e-07	0.331424	0.584	0.751	0.0175095
Tomm5	0.000230732	0.330552	0.373	0.518	1
Gpx3	0.000495185	0.328334	0.163	0.272	1
Cox6a1	3.21e-06	0.323622	0.434	0.608	0.0661275
Ccnd2	0.000143355	0.322092	0.142	0.252	1
Hist1h2ap	5.22e-07	0.321102	0.026	0.117	0.010749
Hsp90b1	0.00406707	0.320842	0.061	0.12	1
Hadha	5.45e-06	0.317609	0.05	0.146	0.112233
Prelid2	4.92e-06	0.315654	0.174	0.324	0.101315
Pgm2	0.000202237	0.314917	0.159	0.272	1
Kcne1	5.58e-05	0.314211	0.105	0.214	1
Ehd4	0.000921318	0.311923	0.111	0.197	1
Dync1i2	0.000153011	0.311822	0.115	0.217	1
Rpl5	2.71e-12	0.31144	0.858	0.916	5.58e-08
Ttn	0.00233859	0.305181	0.057	0.117	1
mt-Nd4l	1.59e-05	0.302998	0.094	0.21	0.327502
Ppib	1.93e-05	0.299358	0.19	0.33	0.397359
Cnih4	0.00211564	0.298069	0.161	0.249	1
Ttc3	0.0114732	0.294784	0.063	0.113	1
Ndufa8	1.11e-05	0.292938	0.455	0.638	0.228144
Krt19	0.000100506	0.287951	0.059	0.142	1
C1qbp	7.26e-05	0.287411	0.39	0.55	1
Nebl	0.000128667	0.286401	0.255	0.385	1
Serbp1	4.97e-05	0.285665	0.545	0.663	1
Tomm20	7.99e-05	0.284188	0.344	0.495	1
Rdx	0.000132066	0.283161	0.148	0.265	1
Zfp106	0.000959216	0.277939	0.054	0.12	1
Hikeshi	1.82e-05	0.277822	0.207	0.353	0.374161
Pcgf5	0.000400212	0.276751	0.102	0.194	1
Apopt1	0.0124094	0.275718	0.124	0.188	1
Rack1	3.39e-07	0.273148	0.684	0.819	0.00698318
Higd1a	1.06e-06	0.273041	0.678	0.828	0.0217274
Eef1a1	4.24e-13	0.272687	0.95	0.977	8.73e-09
Hddc3	2.57e-05	0.272305	0.031	0.104	0.528137
Actg1	0.000994093	0.272081	0.329	0.453	1
Snrpd3	0.000651606	0.271438	0.281	0.405	1
Acta1	3.24e-05	0.271265	0.403	0.563	0.667026
Snrnp70	0.000244214	0.270959	0.083	0.172	1
Krt18	0.0224097	0.270268	0.065	0.113	1
Dad1	7.92e-05	0.269777	0.29	0.437	1
Itm2a	0.0147788	0.267847	0.065	0.117	1
Ociad1	0.00423973	0.267675	0.05	0.104	1
Ncl	0.000281303	0.266923	0.176	0.291	1
Cltc	0.000153234	0.266642	0.054	0.133	1
Ndufa9	1.86e-05	0.26475	0.157	0.291	0.38193
Mrpl19	9.42e-05	0.25985	0.061	0.146	1
Nutf2	0.000261836	0.259767	0.074	0.159	1
Eif2s2	8.79e-05	0.258405	0.481	0.631	1
Mpc2	9.42e-05	0.25582	0.451	0.608	1
B2m	0.0040597	0.255523	0.063	0.123	1
Aldoa	7.29e-10	0.255011	0.908	0.955	1.5e-05
Sod1	0.000752062	0.254851	0.126	0.22	1
Fam60a	0.00335165	0.25403	0.076	0.142	1
mt-Co2	1.03e-06	0.250908	0.889	0.971	0.0212923
Vegfb	0.00337903	0.25021	0.266	0.372	1
Mrps18c	0.229321	-0.250151	0.266	0.246	1
Ccl27a	0.072937	-0.250912	0.142	0.1	1
Plgrkt	0.0439444	-0.251282	0.129	0.084	1
Ywhaq	0.0411344	-0.252006	0.473	0.443	1
Drap1	0.0587365	-0.253568	0.264	0.217	1
C1d	0.157414	-0.253605	0.327	0.304	1
Hmgn3	0.0374329	-0.254352	0.279	0.223	1
Rab7	0.0870765	-0.255001	0.142	0.104	1
Sae1	0.0957153	-0.255189	0.133	0.097	1
Serf2	7.36e-08	-0.256199	0.965	0.958	0.00151492
1810058I24Rik	0.0433214	-0.256613	0.556	0.54	1
Anapc16	0.16545	-0.257022	0.157	0.126	1
Ssbp1	0.407624	-0.257963	0.259	0.252	1
Mrpl23	0.0288452	-0.25805	0.475	0.437	1
Tipin	0.41605	-0.258372	0.146	0.133	1
Rap1a	0.1014	-0.259088	0.246	0.207	1
Cox20	0.0671519	-0.259099	0.442	0.421	1
Ddah2	0.0607255	-0.260249	0.159	0.117	1
Tmsb4x	9.95e-08	-0.262095	0.989	0.994	0.00204827
Hcfc1r1	0.00328982	-0.262915	0.699	0.702	1
Stub1	0.0704453	-0.26425	0.246	0.201	1
Pdlim3	0.0237602	-0.265318	0.203	0.142	1
Map1lc3b	0.0285806	-0.26621	0.353	0.291	1
Sh3bgr	0.00342672	-0.266424	0.662	0.696	1
Pebp1	0.00631076	-0.267492	0.601	0.57	1
Mthfd2l	0.121951	-0.268479	0.105	0.074	1
Lsm2	0.140547	-0.26879	0.325	0.294	1
Idi1	0.034083	-0.26929	0.126	0.081	1
Hmgb3	0.153079	-0.269634	0.159	0.129	1
Pfn2	0.00638549	-0.270197	0.111	0.055	1
S100a13	0.0815212	-0.270922	0.253	0.21	1
Cav3	0.112742	-0.27094	0.12	0.087	1
Edf1	0.00570707	-0.272277	0.471	0.405	1
Cox5b	2.38e-07	-0.272593	0.928	0.903	0.00489622
Rnf11	0.0163675	-0.272819	0.102	0.055	1
Calm2	0.0462441	-0.274334	0.412	0.362	1
Fitm1	0.0585103	-0.275035	0.257	0.207	1
Nenf	0.185946	-0.275229	0.246	0.217	1
Psma4	0.0666491	-0.276117	0.379	0.343	1
Hadh	0.0180845	-0.276228	0.253	0.188	1
Fth1	4.06e-09	-0.276667	0.972	0.948	8.36e-05
Rab11b	0.0223082	-0.276946	0.19	0.133	1
Cfl2	9.55e-05	-0.278074	0.656	0.589	1
Cript	0.00756946	-0.278921	0.281	0.204	1
Uqcc2	0.000753394	-0.279113	0.61	0.528	1
Lsm6	0.00204125	-0.28098	0.512	0.447	1
Rex1bd	0.0421791	-0.281366	0.264	0.214	1
Apex1	0.0605581	-0.281482	0.153	0.11	1
Capns1	0.099425	-0.281703	0.196	0.159	1
Atpif1	8.76e-09	-0.283714	0.919	0.874	0.000180306
Rrm2	0.654387	-0.283907	0.196	0.197	1
Cavin3	0.365765	-0.28435	0.174	0.159	1
Rbm3	0.00515272	-0.285964	0.501	0.43	1
Ccdc167	0.016049	-0.286153	0.139	0.084	1
Dynlt3	0.0290044	-0.286729	0.109	0.065	1
Oaz1	8.5e-10	-0.286857	0.889	0.825	1.75e-05
Ccnd3	0.0556818	-0.287911	0.283	0.233	1
Gnb2	0.101957	-0.290831	0.279	0.243	1
Mrpl33	0.0149884	-0.292023	0.386	0.32	1
Gtf2h5	0.036006	-0.292562	0.431	0.405	1
Psmd7	0.110928	-0.293318	0.196	0.159	1
Tbcb	0.0722353	-0.293856	0.316	0.282	1
Apobec2	0.0280859	-0.29525	0.336	0.285	1
Eid1	0.0423899	-0.296108	0.444	0.414	1
Rnf7	2.77e-05	-0.296365	0.678	0.592	0.57045
Cdk2ap1	0.0170079	-0.297213	0.2	0.139	1
Med8	0.201212	-0.297809	0.109	0.084	1
Mrps36	0.096506	-0.29806	0.508	0.508	1
Sumo2	5.57e-06	-0.300123	0.78	0.718	0.114554
Ndufb2	3.98e-06	-0.301969	0.719	0.667	0.0818994
Nudt4	0.00762859	-0.302203	0.105	0.052	1
Smdt1	0.000469444	-0.303633	0.595	0.553	1
Ubl5	0.000370011	-0.303961	0.588	0.521	1
Capza2	0.00959823	-0.304202	0.292	0.223	1
Ptp4a1	0.0393749	-0.304842	0.176	0.126	1
Ppp1cb	0.00749271	-0.304988	0.325	0.246	1
Cdc42	0.0094265	-0.306501	0.549	0.511	1
Pcbd1	0.00717905	-0.307545	0.203	0.133	1
Smpx	0.00013313	-0.308314	0.725	0.699	1
Serf1	0.0177192	-0.310633	0.349	0.285	1
Hsd17b10	0.0882405	-0.311431	0.257	0.22	1
Trappc6a	0.00636867	-0.318529	0.227	0.155	1
Prdx1	2.13e-05	-0.318551	0.732	0.657	0.438167
Gpx1	0.0079749	-0.318562	0.434	0.385	1
Ssna1	0.0451841	-0.325054	0.183	0.136	1
1810037I17Rik	0.0024664	-0.328126	0.488	0.408	1
Smim1	0.00664414	-0.329985	0.111	0.055	1
Mrpl14	0.0412565	-0.331248	0.307	0.262	1
Lsm4	0.00649977	-0.332326	0.492	0.472	1
Eif3e	0.00254391	-0.333064	0.447	0.362	1
Paip2	0.00791249	-0.33363	0.325	0.256	1
Sp3os	0.0292213	-0.338037	0.207	0.152	1
Mtch1	0.00219867	-0.339728	0.312	0.22	1
Iscu	0.0713765	-0.341515	0.266	0.23	1
Csrp2	0.174435	-0.343997	0.606	0.667	1
Khdrbs3	0.0527863	-0.345081	0.163	0.12	1
Vamp3	0.0041942	-0.346711	0.161	0.094	1
Atcayos	0.00261587	-0.349584	0.255	0.172	1
Svbp	0.00324402	-0.351821	0.318	0.233	1
Crip2	6.96e-11	-0.362348	0.893	0.858	1.43e-06
Hint2	0.0117348	-0.364736	0.207	0.142	1
Yeats4	0.0174361	-0.372133	0.224	0.165	1
Prrx2	0.000654834	-0.378338	0.146	0.068	1
Cebpzos	0.00337172	-0.385352	0.218	0.142	1
Hnrnpf	0.000843073	-0.385652	0.431	0.346	1
Josd2	0.000406562	-0.389598	0.279	0.178	1
H2afv	0.000361486	-0.395129	0.549	0.466	1
Cdkn1c	8.69e-05	-0.39613	0.584	0.498	1
Mrps18a	0.0166297	-0.407933	0.185	0.129	1
Tsc22d3	0.0020349	-0.449797	0.233	0.152	1
Pclaf	0.0135272	-0.45543	0.312	0.259	1
Tnni1	2.02e-18	-0.46943	0.908	0.867	4.16e-14
Mgst3	3.43e-05	-0.470855	0.331	0.207	0.704828
Atox1	2.31e-07	-0.513262	0.536	0.414	0.00474941
Cited1	0.0507854	-0.521002	0.377	0.346	1
Myl1	5.41e-07	-0.557807	0.264	0.12	0.0111242
Tcap	1.34e-06	-0.593416	0.364	0.22	0.0275567
5430431A17Rik	7.95e-08	-0.661986	0.447	0.298	0.00163579
Gm10076	3.54e-14	-0.666516	0.673	0.531	7.27e-10
