# Supplementary material for: Single Cell Sequencing Reveals Mechanisms of Persistent Truncus Arteriosus Formation after PDGFRα and PDGFRβ Double Knockout in Cardiac Neural Crest Cells
Source: Genes (Basel). 2022 Sep 23;13(10):1708. doi: 10.3390/genes13101708 (PMC9601305; doi:10.3390/genes13101708)
Supplement: Supplementary file 1 [file genes-13-01708-s001.zip › Table S8. Differentially expressed genes between MS I and II. Related to Figure 5.xlsx]

## Sheet: MS I
Table S5. Differentially expressed genes between MS I and II. Related to Figure 5.
gene	p_val	avg_logFC	pct.1	pct.2	p_val_adj
Hapln1	4.68353e-60	1.29272	0.634	0.067	9.63731e-56
Car3	2.83102e-17	1.25368	0.378	0.123	5.8254e-13
Mgp	6.34858e-32	1.0007	0.674	0.313	1.30635e-27
Thbs1	7.16569e-33	0.987239	0.658	0.357	1.47448e-28
Lum	9.57904e-37	0.986794	0.58	0.163	1.97108e-32
Apoe	3.28861e-28	0.946244	0.559	0.226	6.76697e-24
Dbi	1.43536e-52	0.921887	0.976	0.976	2.95354e-48
Twist1	2.83944e-39	0.865434	0.766	0.464	5.84271e-35
Ramp2	4.12962e-29	0.829057	0.625	0.29	8.49751e-25
H19	3.57963e-33	0.748921	0.924	0.821	7.3658e-29
Aspscr1	3.98233e-21	0.654955	0.443	0.147	8.19444e-17
Vcan	4.19199e-23	0.612729	0.799	0.675	8.62587e-19
Col18a1	6.62718e-23	0.596953	0.546	0.23	1.36367e-18
Igf1	1.67407e-20	0.543728	0.649	0.357	3.44473e-16
Bgn	2.58454e-18	0.54338	0.636	0.425	5.31821e-14
Htra1	2.75116e-19	0.538297	0.35	0.075	5.66105e-15
Id1	3.15876e-15	0.531591	0.797	0.722	6.49978e-11
Fabp5	1.38914e-10	0.527338	0.68	0.587	2.85843e-06
Uba52	5.90974e-46	0.512361	0.988	0.988	1.21605e-41
Cthrc1	4.33689e-13	0.474514	0.89	0.865	8.92403e-09
Igfbp7	1.807e-12	0.455827	0.656	0.46	3.71826e-08
Gm42418	1.16636e-11	0.448133	0.322	0.119	2.40001e-07
Gm11808	3.63737e-16	0.447347	0.789	0.726	7.48462e-12
Tagln2	6.56825e-25	0.42723	0.956	0.984	1.35155e-20
Crip2	7.27497e-09	0.422801	0.519	0.369	0.000149697
Fbln2	2.26425e-13	0.4181	0.75	0.679	4.65914e-09
Ociad2	1.64058e-11	0.415216	0.475	0.278	3.37583e-07
Papss2	7.45459e-12	0.412716	0.31	0.107	1.53393e-07
Hspe1	2.18815e-26	0.411082	0.938	0.96	4.50255e-22
Snai2	1.97634e-13	0.400944	0.402	0.175	4.06671e-09
Igf2	2.42858e-09	0.397566	0.411	0.218	4.99728e-05
Tcf12	1.43139e-09	0.371043	0.428	0.25	2.94537e-05
Cda	4.93587e-12	0.370435	0.426	0.19	1.01565e-07
Malat1	1.36859e-08	0.345063	0.992	1	0.000281615
Fos	2.35655e-07	0.342872	0.388	0.222	0.00484908
Dctpp1	7.22735e-08	0.341993	0.51	0.369	0.00148717
Ncl	1.30381e-07	0.333495	0.618	0.512	0.00268284
Nme2	1.52718e-10	0.332484	0.763	0.726	3.14248e-06
Commd3	1.15775e-08	0.321993	0.537	0.377	0.00023823
Rps28	2.09988e-35	0.30177	0.997	1	4.32092e-31
Rpl39	5.30483e-44	0.285545	1	1	1.09157e-39
Rcsd1	8.27419e-10	0.281658	0.264	0.091	1.70258e-05
Enc1	9.6308e-08	0.278255	0.337	0.175	0.00198173
Rpl35	3.52524e-27	0.273986	0.996	1	7.25389e-23
Rack1	5.27665e-16	0.272982	0.943	0.96	1.08578e-11
Rpl12	1.68632e-26	0.266116	0.99	1	3.46993e-22
Mrpl52	8.06276e-10	0.26271	0.881	0.849	1.65907e-05
5033428I22Rik	3.05693e-07	0.256623	0.501	0.349	0.00629024
Nop10	5.28387e-09	0.254128	0.901	0.917	0.000108726
Rhou	2.02134e-06	0.252435	0.524	0.381	0.0415932

## Sheet: MS II
gene	p_val	avg_logFC	pct.1	pct.2	p_val_adj
Sfrp2	3.5424e-131	1.80131	0.976	0.449	7.28921e-127
Penk	1.7706e-179	1.53362	0.687	0.084	3.64337e-175
Fbln5	5.38183e-167	1.52728	0.881	0.197	1.10742e-162
Cxcl12	3.09035e-125	1.4049	0.77	0.174	6.35902e-121
Plac8	1.87392e-92	1.09912	0.353	0.036	3.85596e-88
Gkn3	6.74623e-96	1.00668	0.706	0.178	1.38817e-91
Gm26771	1.16264e-78	0.871226	0.619	0.162	2.39235e-74
Sema3c	2.08927e-142	0.832922	0.464	0.04	4.2991e-138
Plk2	1.10774e-62	0.816615	0.857	0.442	2.27939e-58
Acta2	3.868e-35	0.785865	0.861	0.536	7.95919e-31
Bmp4	9.06318e-61	0.780749	0.786	0.355	1.86493e-56
Tagln	8.0372e-47	0.768802	0.988	0.818	1.65381e-42
Myl9	1.8517e-43	0.760274	0.841	0.486	3.81024e-39
Frzb	2.74477e-111	0.674853	0.536	0.08	5.64791e-107
Tbx18	3.3646e-71	0.670247	0.508	0.115	6.92334e-67
Bdnf	3.01324e-75	0.647774	0.536	0.117	6.20035e-71
Ptn	3.44376e-23	0.63245	0.869	0.681	7.08622e-19
Cnn1	3.94213e-42	0.629095	0.651	0.273	8.11172e-38
Ctgf	4.0328e-32	0.612264	0.813	0.49	8.2983e-28
Actc1	6.27437e-16	0.578018	0.718	0.532	1.29108e-11
Ramp1	6.30233e-90	0.568804	0.417	0.055	1.29683e-85
Cd55	8.5738e-90	0.56309	0.369	0.042	1.76423e-85
Bex3	5.32173e-31	0.558364	0.984	0.885	1.09505e-26
Tcf24	1.94576e-124	0.55354	0.282	0.01	4.00379e-120
Inhba	5.93303e-32	0.540143	0.706	0.369	1.22084e-27
Cdkn1c	2.17714e-38	0.533717	0.722	0.367	4.47989e-34
Trib2	3.44109e-64	0.53306	0.476	0.109	7.08073e-60
Csrp2	1.22602e-50	0.522663	0.996	0.937	2.52278e-46
Hotairm1	1.08142e-34	0.49701	0.433	0.146	2.22523e-30
Gm15050	4.04711e-71	0.494645	0.397	0.066	8.32774e-67
Lhfp	1.19166e-25	0.485624	0.73	0.486	2.45209e-21
Smim3	5.7772e-35	0.484528	0.508	0.203	1.18877e-30
Robo2	2.7029e-28	0.479863	0.512	0.229	5.56175e-24
Efnb2	1.31309e-54	0.471344	0.429	0.101	2.70195e-50
Basp1	2.38594e-25	0.457632	0.833	0.574	4.90955e-21
Ybx3	4.62881e-30	0.452992	0.849	0.582	9.52471e-26
Lmo4	2.17695e-24	0.452699	0.913	0.721	4.47951e-20
Sat1	9.28507e-21	0.443666	0.671	0.413	1.91059e-16
Mpped2	4.44805e-26	0.442978	0.687	0.411	9.15274e-22
Myl6	6.18929e-50	0.441862	1	0.977	1.27357e-45
Hmgb3	8.19871e-22	0.438674	0.766	0.561	1.68705e-17
Tshz2	1.58428e-49	0.438565	0.385	0.088	3.25997e-45
Serpine2	1.37321e-19	0.437955	0.663	0.414	2.82565e-15
Fdps	2.98754e-16	0.436309	0.571	0.346	6.14746e-12
Foxc1	4.91181e-36	0.433604	0.369	0.106	1.0107e-31
F2r	1.63783e-18	0.431138	0.869	0.676	3.37016e-14
Cd34	1.97198e-21	0.425746	0.599	0.346	4.05775e-17
Peg3	6.29309e-19	0.425658	0.869	0.687	1.29493e-14
Tceal9	1.40033e-22	0.415988	0.988	0.89	2.88147e-18
Bex1	8.57136e-22	0.415539	0.448	0.202	1.76373e-17
Cnn2	3.06943e-25	0.410377	0.849	0.574	6.31597e-21
Scx	1.72239e-32	0.407419	0.476	0.177	3.54416e-28
Ddah2	3.36865e-22	0.403776	0.865	0.666	6.93166e-18
Tsc22d1	5.58157e-22	0.402855	0.893	0.721	1.14852e-17
Emb	1.74871e-39	0.394548	0.313	0.073	3.59832e-35
Glipr2	2.06446e-23	0.390321	0.742	0.467	4.24804e-19
Tpm1	2.06069e-25	0.389353	0.972	0.838	4.24028e-21
Cd200	8.8838e-18	0.389019	0.496	0.262	1.82802e-13
Rgs5	3.38866e-34	0.388593	0.266	0.06	6.97285e-30
Bex4	3.78037e-18	0.387215	0.635	0.389	7.77888e-14
Fibin	2.6876e-31	0.383824	0.381	0.117	5.53027e-27
Flrt3	2.48031e-21	0.380176	0.619	0.356	5.10374e-17
Selenom	5.96845e-20	0.377406	0.913	0.731	1.22813e-15
Cpe	1.3541e-27	0.377049	0.421	0.163	2.78633e-23
Erp29	4.12976e-21	0.376921	0.81	0.602	8.4978e-17
Nfic	1.02393e-26	0.375358	0.532	0.251	2.10694e-22
Khdrbs3	2.71435e-19	0.372679	0.567	0.312	5.58532e-15
Tgfb2	2.93014e-17	0.370755	0.758	0.52	6.02934e-13
Errfi1	1.39367e-26	0.354757	0.397	0.146	2.86775e-22
Plod2	2.12503e-18	0.353717	0.798	0.562	4.37268e-14
Kras	2.51278e-15	0.349842	0.524	0.326	5.17055e-11
Rhob	1.58632e-14	0.347737	0.758	0.563	3.26417e-10
Tubb2b	2.26735e-22	0.346919	0.54	0.278	4.66553e-18
Hoxb2	4.24203e-40	0.343481	0.278	0.056	8.72883e-36
Calm1	2.39736e-24	0.330515	0.988	0.901	4.93304e-20
Mtx2	1.81018e-14	0.324743	0.69	0.521	3.7248e-10
Map1lc3a	1.54884e-17	0.324271	0.845	0.693	3.18705e-13
Wnt5a	2.39641e-15	0.322763	0.456	0.251	4.93109e-11
Tgfb1i1	6.06532e-15	0.320776	0.552	0.352	1.24806e-10
Pdgfc	1.2501e-19	0.317906	0.353	0.145	2.57233e-15
Ccdc80	9.41885e-16	0.313155	0.333	0.149	1.93812e-11
Qpct	3.76005e-14	0.312926	0.556	0.372	7.73706e-10
Myl12a	4.61221e-26	0.311882	1	0.964	9.49054e-22
Psmd8	5.91219e-15	0.311073	0.865	0.698	1.21655e-10
2810001G20Rik	1.54702e-16	0.310036	0.325	0.143	3.18331e-12
Actg1	1.54159e-33	0.307876	1	0.987	3.17214e-29
Ghr	2.09846e-20	0.307038	0.298	0.108	4.318e-16
Chmp2b	4.07723e-11	0.304075	0.512	0.339	8.38971e-07
Gata6	2.3133e-14	0.299429	0.861	0.676	4.76008e-10
Sparc	2.55006e-21	0.291586	0.992	0.918	5.24725e-17
Maged2	2.07763e-16	0.290234	0.71	0.477	4.27515e-12
Hspb1	8.45048e-09	0.287672	0.774	0.618	0.000173886
Pdlim3	1.01827e-18	0.28675	0.992	0.956	2.09529e-14
Ppp1cb	3.48178e-11	0.284891	0.766	0.62	7.16446e-07
H2afz	1.28268e-09	0.284046	1	0.982	2.63937e-05
Ckb	1.0315e-11	0.283846	0.433	0.254	2.12252e-07
Rtn4	8.71887e-13	0.282416	0.877	0.699	1.79408e-08
Fhl2	3.33672e-15	0.280484	0.357	0.169	6.86597e-11
Lrpap1	2.32158e-13	0.274875	0.484	0.291	4.77712e-09
Cfl1	2.87918e-21	0.272761	0.996	0.949	5.92449e-17
Fibp	5.18372e-12	0.271793	0.484	0.301	1.06665e-07
Gpx8	7.65498e-13	0.270844	0.81	0.63	1.57517e-08
Tuba1a	1.65649e-14	0.269864	0.96	0.871	3.40856e-10
Actr3	3.78855e-13	0.267567	0.778	0.591	7.79571e-09
Tmeff1	3.15461e-13	0.267075	0.456	0.265	6.49124e-09
Myl12b	7.20732e-11	0.266733	0.857	0.698	1.48305e-06
Rcn2	2.5677e-11	0.26639	0.778	0.612	5.28356e-07
Cdc42ep3	2.46473e-17	0.258579	0.329	0.134	5.07167e-13
Tcim	4.63957e-12	0.258468	0.488	0.301	9.54685e-08
Atxn7l3b	1.38616e-14	0.257658	0.865	0.705	2.8523e-10
Eif3h	1.17858e-12	0.255331	0.905	0.759	2.42517e-08
Pbx1	2.26224e-11	0.250878	0.476	0.3	4.65501e-07
Ywhah	1.72807e-11	0.250326	0.746	0.581	3.55586e-07
