# Supplementary material for: Single Cell Sequencing Reveals Mechanisms of Persistent Truncus Arteriosus Formation after PDGFRα and PDGFRβ Double Knockout in Cardiac Neural Crest Cells
Source: Genes (Basel). 2022 Sep 23;13(10):1708. doi: 10.3390/genes13101708 (PMC9601305; doi:10.3390/genes13101708)
Supplement: Supplementary file 1 [file genes-13-01708-s001.zip › Table S9. Differentially Expressed Genes between DKO and control group of MS I cluster. Related to Figure 5.xlsx]

## Sheet: MS I
Table S6. Differentially Expressed Genes between DKO and control group of MS I cluster. Related to Figure 5.
gene	p_val	avg_logFC	pct.1	pct.2	p_val_adj
Dbi	6.35e-77	0.519265	0.962	0.991	1.31e-72
Ramp2	4.97e-50	0.466173	0.509	0.757	1.02e-45
AC167229.1	2.66e-26	0.446103	0.114	0.265	5.47e-22
Gm11808	4.7e-89	0.435578	0.687	0.906	9.68e-85
Rpl13a	9.02e-84	0.428644	0.638	0.882	1.86e-79
Nme2	1.17e-75	0.420828	0.663	0.879	2.42e-71
F2r	5.95e-41	0.392481	0.571	0.797	1.22e-36
Igf2r	2.12e-48	0.390973	0.562	0.823	4.36e-44
Gm14226	7.69e-27	0.387972	0.107	0.26	1.58e-22
Nsa2	5.58e-65	0.383358	0.654	0.875	1.15e-60
Hapln1	5.67e-35	0.377041	0.537	0.744	1.17e-30
Rpl10	6.23e-129	0.364092	0.958	0.99	1.28e-124
Rack1	2.73e-109	0.362424	0.916	0.973	5.62e-105
Lmo4	8.24e-42	0.360345	0.621	0.836	1.7e-37
Uba52	1.08e-144	0.35745	0.982	0.994	2.21e-140
Kitl	6.84e-41	0.355216	0.139	0.349	1.41e-36
Ucp2	4.17e-75	0.351728	0.091	0.382	8.59e-71
Ktn1	7.4e-60	0.348933	0.351	0.667	1.52e-55
Aldoa	1.98e-48	0.338376	0.818	0.938	4.07e-44
Eef1a1	1.22e-144	0.337116	0.989	0.999	2.51e-140
Myl7	1.78e-18	0.333769	0.164	0.317	3.66e-14
Vcan	1.56e-44	0.331329	0.714	0.896	3.21e-40
Prpf4b	3.55e-57	0.326542	0.376	0.698	7.29e-53
Eif2s3y	1.65e-111	0.325894	0	0.281	3.41e-107
Apoe	2.33e-24	0.325198	0.465	0.668	4.79e-20
Ncam1	2.06e-41	0.322854	0.502	0.764	4.24e-37
Gm42418	2.77e-59	0.32134	0.178	0.486	5.69e-55
Myl3	7.81e-06	0.314539	0.209	0.289	0.160728
Itgb1	1.86e-43	0.313832	0.661	0.851	3.83e-39
Loxl2	5.87e-33	0.307197	0.511	0.73	1.21e-28
Bnip3	5.7e-37	0.306982	0.289	0.549	1.17e-32
Npm1	1.31e-64	0.306338	0.89	0.971	2.69e-60
Igfbp5	1.85e-31	0.299805	0.132	0.317	3.81e-27
Egln3	2.55e-59	0.298496	0.049	0.265	5.25e-55
Itm2b	3.11e-45	0.297357	0.852	0.953	6.41e-41
Hsp90b1	7.14e-37	0.297045	0.838	0.936	1.47e-32
P4ha1	3.2e-43	0.294524	0.323	0.599	6.59e-39
Pgk1	2.63e-40	0.293941	0.698	0.887	5.4e-36
Serbp1	1.19e-41	0.293712	0.765	0.92	2.46e-37
Grcc10	9.37e-51	0.293635	0.461	0.743	1.93e-46
Hes1	8.38e-30	0.292839	0.679	0.852	1.72e-25
Car3	0.00225259	0.290249	0.358	0.401	1
Rpl5	2.82e-83	0.288415	0.947	0.98	5.8e-79
Rpl23a	1.19e-117	0.284755	0.993	0.994	2.46e-113
Snhg6	3.91e-38	0.284187	0.633	0.835	8.04e-34
Prrc2c	7.16e-35	0.282039	0.293	0.542	1.47e-30
Pttg1	6.74e-20	0.275137	0.341	0.505	1.39e-15
Hsp90ab1	9.39e-86	0.272304	0.969	0.995	1.93e-81
Cox7a2l	1.42e-37	0.271746	0.609	0.831	2.93e-33
Rpl3	2.05e-72	0.270745	0.937	0.983	4.23e-68
Pabpc1	3.78e-39	0.270007	0.684	0.867	7.78e-35
Cdkn1a	6.02e-19	0.268248	0.048	0.143	1.24e-14
Ctsl	1.42e-33	0.267889	0.781	0.913	2.92e-29
Hnrnpc	9.12e-34	0.26639	0.563	0.792	1.88e-29
Ptprb	3.14e-46	0.263557	0.098	0.317	6.45e-42
Tpr	4.55e-40	0.262367	0.273	0.537	9.37e-36
Eef1b2	8.49e-65	0.258732	0.938	0.988	1.75e-60
Eif5b	6.61e-38	0.256317	0.462	0.721	1.36e-33
Ldha	1.42e-40	0.255763	0.851	0.955	2.93e-36
Pdia3	1.88e-27	0.251031	0.682	0.86	3.88e-23
Pam	6.71e-18	0.250452	0.38	0.558	1.38e-13
Lsm4	4.45e-12	-0.251675	0.699	0.73	9.16e-08
mt-Nd5	0.00307482	-0.2537	0.879	0.917	1
Atpif1	9.65e-30	-0.253996	0.973	0.966	1.99e-25
Atp5h	3.56e-38	-0.254746	0.948	0.95	7.33e-34
Cnn2	8.22e-05	-0.254804	0.56	0.59	1
Ndufb7	4.34e-11	-0.255256	0.751	0.786	8.92e-07
Atp5j2	1.7e-24	-0.255315	0.937	0.947	3.51e-20
Srsf2	1.52e-11	-0.259356	0.647	0.659	3.12e-07
Shisa2	8.95e-05	-0.261081	0.321	0.292	1
Ddah2	3.79e-11	-0.262176	0.659	0.673	7.8e-07
mt-Nd4	3.31e-70	-0.268958	0.993	0.994	6.8e-66
Ndufa5	3.23e-21	-0.270116	0.818	0.834	6.65e-17
D8Ertd738e	5.53e-20	-0.270802	0.837	0.846	1.14e-15
Uqcr10	3.33e-22	-0.271234	0.886	0.89	6.85e-18
Spint2	1.11e-09	-0.272462	0.617	0.596	2.27e-05
Atox1	7.45e-25	-0.275834	0.866	0.869	1.53e-20
Elob	3.58e-50	-0.27792	0.985	0.982	7.36e-46
mt-Nd4l	1.74e-12	-0.283246	0.861	0.883	3.58e-08
Crabp1	6.11e-06	-0.292575	0.26	0.207	0.125826
H19	0.0541694	-0.295846	0.923	0.925	1
Rex1bd	9.24e-09	-0.295999	0.56	0.554	0.000190225
Emilin1	1.05e-05	-0.296963	0.433	0.425	0.215771
Cirbp	2.44e-12	-0.301847	0.551	0.527	5.01e-08
Uqcrq	1.56e-35	-0.30646	0.925	0.919	3.2e-31
Ubc	1.08e-06	-0.306957	0.441	0.417	0.0222236
Ppp1r14b	1.01e-25	-0.309212	0.797	0.795	2.08e-21
Gm26532	4.05e-05	-0.31026	0.369	0.347	0.833765
Uqcc2	1.88e-18	-0.312303	0.851	0.843	3.88e-14
Tgfbi	2.85e-10	-0.318862	0.686	0.7	5.85e-06
H2afj	1.14e-19	-0.333573	0.766	0.748	2.35e-15
Acta2	0.00324136	-0.340529	0.543	0.527	1
Plk2	1.49e-11	-0.342393	0.47	0.41	3.07e-07
Myl9	9.75e-05	-0.345998	0.489	0.482	1
mt-Atp6	4.09e-131	-0.357813	0.997	0.999	8.41e-127
Cthrc1	1.38e-19	-0.372874	0.871	0.912	2.84e-15
Mfap4	8.79e-15	-0.377058	0.553	0.495	1.81e-10
Hbb-y	2.25e-34	-0.398742	0.432	0.249	4.63e-30
Tnni1	9.36e-15	-0.431051	0.484	0.406	1.93e-10
Tcf21	6.1e-22	-0.464961	0.463	0.333	1.25e-17
Fos	4.76e-16	-0.478118	0.426	0.345	9.78e-12
Gm26917	0.000705834	-0.501666	0.109	0.077	1
Gm10076	1.01e-106	-0.504094	0.915	0.893	2.09e-102
mt-Cytb	1.3e-157	-0.523819	0.998	0.998	2.68e-153
Tsix	1.72e-111	-0.650774	0.312	0.001	3.55e-107
Sfrp2	2.94e-31	-0.668687	0.527	0.36	6.04e-27
Ptn	5.22e-59	-0.712564	0.755	0.595	1.07e-54
Xist	0	-1.92766	0.826	0.001	0
