# Supplementary material for: Single Cell Sequencing Reveals Mechanisms of Persistent Truncus Arteriosus Formation after PDGFRα and PDGFRβ Double Knockout in Cardiac Neural Crest Cells
Source: Genes (Basel). 2022 Sep 23;13(10):1708. doi: 10.3390/genes13101708 (PMC9601305; doi:10.3390/genes13101708)
Supplement: Supplementary file 1 [file genes-13-01708-s001.zip › Table S10. Differentially expressed genes between VSMC I and II. Related to Figure 6.xlsx]

## Sheet: VSMC I
Table S7. Differentially expressed genes between VSMC I and II. Related to Figure 6.
gene	p_val	avg_logFC	pct.1	pct.2	p_val_adj
Col1a2	7.11e-171	0.720534	0.895	0.33	1.46e-166
Eln	1.38e-129	0.671842	0.844	0.351	2.84e-125
Fbln5	9.36e-111	0.585363	0.818	0.345	1.93e-106
Malat1	7.09e-111	0.574802	0.997	0.86	1.46e-106
Cxcl12	9.82e-96	0.528816	0.945	0.592	2.02e-91
Meg3	1.37e-118	0.431765	0.749	0.252	2.81e-114
Col3a1	1.73e-86	0.413038	0.922	0.453	3.56e-82
Peg3	4.13e-111	0.403553	0.846	0.333	8.49e-107
Itm2a	4.92e-67	0.40239	0.767	0.356	1.01e-62
Btg1	8.16e-77	0.353355	0.789	0.354	1.68e-72
Nfib	6.7e-103	0.338697	0.768	0.279	1.38e-98
mt-Atp6	1.11e-72	0.334978	0.996	0.955	2.28e-68
Son	2.41e-102	0.328821	0.735	0.26	4.96e-98
mt-Nd4	3.83e-71	0.328095	0.993	0.884	7.88e-67
mt-Nd3	1.78e-58	0.319581	0.983	0.726	3.65e-54
Gata6	8.11e-101	0.31868	0.788	0.302	1.67e-96
Fbln2	6.89e-88	0.318144	0.751	0.294	1.42e-83
mt-Nd1	3.4e-58	0.299821	0.993	0.87	7e-54
mt-Co3	1.07e-70	0.292767	1	0.981	2.21e-66
Mgp	1.19e-45	0.28536	0.938	0.624	2.44e-41
Slc38a2	2.4e-88	0.285266	0.781	0.308	4.94e-84
Ptn	1.48e-43	0.285255	0.927	0.608	3.04e-39
mt-Cytb	3.18e-48	0.27347	0.997	0.964	6.54e-44
Hes1	1.25e-56	0.263919	0.729	0.337	2.56e-52
mt-Co1	4.63e-58	0.260973	0.998	0.91	9.52e-54
Bambi	2.16e-68	0.257762	0.77	0.349	4.44e-64
Tm2d1	5.84e-87	0.250502	0.682	0.251	1.2e-82

## Sheet: VSMC II
gene	p_val	avg_logFC	pct.1	pct.2	p_val_adj
Dbi	1.44e-11	0.579217	0.635	0.843	2.97e-07
Tagln2	7.27e-16	0.53758	0.638	0.769	1.5e-11
Tmsb4x	6.95e-67	0.373706	0.999	0.999	1.43e-62
Tmsb10	1.43e-94	0.363254	0.996	0.999	2.95e-90
Actb	3.08e-41	0.343631	0.98	0.996	6.34e-37
H2afz	1.09e-30	0.3426	0.929	0.987	2.24e-26
Hbb-y	7.66e-09	0.322049	0.177	0.292	0.000157682
Myh9	1.05e-08	0.305875	0.188	0.306	0.000215332
Mif	5.5e-20	0.285725	0.882	0.98	1.13e-15
Atpif1	2.46e-07	0.271629	0.725	0.935	0.00506902
Gyg	2.35e-19	0.260345	0.269	0.501	4.84e-15
Jpt1	3.23e-12	0.258694	0.284	0.477	6.65e-08
