# Supplementary material for: Single Cell Sequencing Reveals Mechanisms of Persistent Truncus Arteriosus Formation after PDGFRα and PDGFRβ Double Knockout in Cardiac Neural Crest Cells
Source: Genes (Basel). 2022 Sep 23;13(10):1708. doi: 10.3390/genes13101708 (PMC9601305; doi:10.3390/genes13101708)
Supplement: Supplementary file 1 [file genes-13-01708-s001.zip › Table S11. Differentially Expressed Genes between DKO and control group of VSMC I and II cluster. Related to Figure 6.xlsx]

## Sheet: VSMC I
Table S8. Differentially Expressed Genes between DKO and control group of VSMC I and II cluster. Related to Figure 6.
gene	p_val	avg_logFC	pct.1	pct.2	p_val_adj
Aldoa	1.59e-120	0.879953	0.793	0.966	3.27e-116
Bnip3	1.2e-72	0.849119	0.169	0.586	2.46e-68
Malat1	1.44e-114	0.808719	0.994	0.999	2.96e-110
Pgk1	6.73e-67	0.68016	0.643	0.879	1.39e-62
Gm11808	2.65e-84	0.640557	0.689	0.893	5.45e-80
Ldha	3.52e-87	0.631486	0.853	0.971	7.25e-83
Uba52	1.46e-165	0.609282	0.98	0.986	2.99e-161
Nsa2	9.29e-70	0.60354	0.685	0.881	1.91e-65
Snhg6	2.39e-53	0.574862	0.733	0.886	4.91e-49
Hk2	6.27e-32	0.574848	0.263	0.51	1.29e-27
Mif	1.78e-88	0.569491	0.962	0.991	3.66e-84
Fam162a	1.58e-40	0.559807	0.682	0.846	3.26e-36
Rpl13a	3.02e-61	0.556762	0.684	0.865	6.22e-57
Gm42418	2.45e-42	0.54656	0.15	0.461	5.05e-38
Eno1	6.22e-46	0.537531	0.623	0.84	1.28e-41
P4ha1	2.39e-38	0.505919	0.267	0.564	4.92e-34
Cox4i2	1.38e-27	0.478575	0.139	0.367	2.85e-23
Tpi1	4.68e-44	0.472829	0.672	0.869	9.63e-40
Ndufa4l2	1.86e-32	0.471874	0.022	0.226	3.84e-28
Cox7a2l	1.23e-43	0.466786	0.608	0.812	2.52e-39
Igfbp5	1.58e-17	0.448148	0.101	0.266	3.25e-13
Eef1a1	4.31e-121	0.440469	0.996	0.997	8.86e-117
Grcc10	9.39e-32	0.421657	0.432	0.675	1.93e-27
Mt1	4.91e-09	0.412442	0.065	0.155	0.000101018
Fxr1	6.68e-29	0.39796	0.312	0.568	1.38e-24
Sox9	5.36e-08	0.392737	0.316	0.43	0.0011026
Rpl17	7.21e-80	0.386773	0.978	0.991	1.48e-75
Rps27	8.94e-91	0.382694	0.996	0.997	1.84e-86
Plod2	1.15e-17	0.381361	0.442	0.622	2.36e-13
Pfkl	4.98e-26	0.381347	0.23	0.469	1.02e-21
Ktn1	1.02e-24	0.380842	0.423	0.652	2.1e-20
Rack1	4.7e-65	0.379599	0.967	0.977	9.67e-61
Rps26	5.36e-131	0.37307	1	1	1.1e-126
Rps28	3.45e-101	0.357931	0.999	1	7.09e-97
Igf2r	5.99e-17	0.354797	0.73	0.855	1.23e-12
Itm2a	1.51e-06	0.351937	0.725	0.791	0.0310206
Wnt5a	1.49e-15	0.351589	0.497	0.662	3.07e-11
Ncam1	1.78e-15	0.350665	0.371	0.538	3.67e-11
Gapdh	9.22e-45	0.350345	0.987	0.995	1.9e-40
Eml4	3.72e-20	0.348018	0.312	0.527	7.65e-16
Rpl6	6.32e-121	0.345977	1	0.998	1.3e-116
Apoe	7.27e-09	0.339099	0.496	0.6	0.000149492
Vcan	5.33e-15	0.337132	0.303	0.483	1.1e-10
Zeb2	1.19e-18	0.328477	0.214	0.416	2.46e-14
Meg3	9.58e-21	0.327758	0.653	0.805	1.97e-16
Rpl37	1.15e-128	0.325808	1	1	2.36e-124
Rpl10	1.16e-58	0.322776	0.986	0.996	2.39e-54
Pabpc1	3.03e-24	0.321643	0.702	0.849	6.23e-20
Gng11	1.58e-08	0.319267	0.438	0.563	0.000325459
Ndufa6	3.53e-27	0.317695	0.842	0.911	7.27e-23
Ddx3y	1.14e-38	0.31713	0	0.213	2.34e-34
Fau	2.2e-90	0.317027	1	1	4.53e-86
Higd1a	6.77e-13	0.316434	0.814	0.855	1.39e-08
Slc38a2	6.78e-21	0.316356	0.71	0.822	1.39e-16
Nrep	9.21e-15	0.31443	0.496	0.657	1.89e-10
Eif2s3y	3.62e-39	0.313996	0	0.216	7.46e-35
Rps7	1.27e-110	0.310697	1	1	2.61e-106
Col1a2	5.54e-14	0.307581	0.868	0.911	1.14e-09
Kdm6b	9.7e-14	0.307483	0.288	0.46	2e-09
Rpl23a	5.92e-82	0.307385	1	0.997	1.22e-77
Rpl24	1.41e-80	0.306244	0.999	1	2.9e-76
Epb41l4aos	3.33e-15	0.3052	0.312	0.488	6.84e-11
Rpl5	2.1e-56	0.302215	0.983	0.991	4.33e-52
Gpi1	3.66e-13	0.296877	0.373	0.53	7.53e-09
Rpl28	7.39e-84	0.295795	1	1	1.52e-79
Ttc3	2.72e-15	0.295234	0.395	0.564	5.59e-11
mt-Nd5	9.27e-26	0.290331	0.84	0.931	1.91e-21
Peg3	4.52e-13	0.289804	0.79	0.879	9.3e-09
Pgam1	1.52e-15	0.289502	0.694	0.798	3.13e-11
Rpl38	8.59e-105	0.289187	1	0.999	1.77e-100
Egr1	2.47e-12	0.28858	0.238	0.394	5.08e-08
mt-Co1	7.15e-46	0.287806	0.997	0.999	1.47e-41
Rpl37a	2.64e-86	0.287308	1	0.997	5.44e-82
Rpl36a	3.57e-75	0.287244	1	0.996	7.35e-71
Rpl7	5.82e-59	0.28664	0.996	0.997	1.2e-54
Nrk	7.73e-14	0.285687	0.477	0.644	1.59e-09
Hmcn1	1.33e-13	0.282148	0.345	0.519	2.75e-09
Npm1	1.51e-39	0.277192	0.984	0.991	3.12e-35
Rpl35a	2.18e-75	0.272868	1	1	4.49e-71
Soat1	2.6e-13	0.27211	0.225	0.383	5.36e-09
Use1	2.74e-16	0.268832	0.254	0.442	5.64e-12
Tcf4	1.82e-13	0.268321	0.314	0.488	3.74e-09
Vegfa	7.47e-20	0.261839	0.077	0.245	1.54e-15
Mrpl24	3.71e-10	0.261602	0.48	0.614	7.64e-06
Cd55	3.26e-08	0.260848	0.478	0.596	0.000670321
Rpl7a	8.68e-49	0.26022	0.994	0.995	1.79e-44
Rpl35	6.68e-61	0.259054	0.997	0.997	1.37e-56
Igsf3	8.5e-12	0.257533	0.286	0.445	1.75e-07
Eif3f	3.37e-14	0.256252	0.62	0.754	6.93e-10
Nfib	2.08e-11	0.253183	0.697	0.809	4.27e-07
mt-Nd6	2.26e-11	0.252356	0.194	0.333	4.65e-07
Dctpp1	1.86e-11	-0.250023	0.451	0.333	3.82e-07
Tmed9	3.55e-14	-0.250512	0.714	0.596	7.31e-10
Ppil1	4.26e-11	-0.25092	0.301	0.189	8.77e-07
Tmpo	9.61e-11	-0.25227	0.543	0.428	1.98e-06
Banf1	5.2e-13	-0.252751	0.724	0.637	1.07e-08
Tmsb4x	2.77e-27	-0.252763	0.999	0.999	5.7e-23
Stub1	1.51e-13	-0.253067	0.643	0.54	3.12e-09
D8Ertd738e	4.46e-16	-0.253992	0.831	0.762	9.18e-12
Ywhah	2.01e-13	-0.254436	0.668	0.568	4.13e-09
Gm26532	3.09e-11	-0.254785	0.389	0.256	6.36e-07
Slc25a5	1.51e-10	-0.255609	0.607	0.515	3.11e-06
Gnb2	1.02e-15	-0.256104	0.762	0.689	2.11e-11
Ptma	2.81e-43	-0.25672	1	0.998	5.78e-39
Actg1	4.95e-33	-0.256742	0.999	0.995	1.02e-28
Ndufs5	1.16e-18	-0.257139	0.86	0.779	2.4e-14
Psmc4	3.86e-13	-0.257707	0.47	0.34	7.93e-09
Siva1	8.47e-13	-0.258801	0.806	0.759	1.74e-08
Eny2	1.47e-15	-0.259296	0.795	0.715	3.02e-11
Nedd8	4.11e-25	-0.259656	0.942	0.89	8.46e-21
Spcs2	1.53e-16	-0.261347	0.799	0.733	3.15e-12
Hnrnpab	4e-20	-0.261803	0.841	0.714	8.23e-16
Ndufa5	3.12e-18	-0.262086	0.824	0.732	6.42e-14
Slc35b1	7.25e-14	-0.262439	0.373	0.23	1.49e-09
Elob	2.33e-35	-0.262504	0.994	0.971	4.78e-31
Hnrnpk	2.64e-23	-0.262925	0.928	0.887	5.44e-19
Sae1	7.14e-13	-0.263008	0.452	0.32	1.47e-08
Hnrnpd	1.01e-13	-0.263367	0.728	0.639	2.09e-09
S100a10	8.89e-15	-0.263599	0.779	0.657	1.83e-10
Nudcd2	1.1e-14	-0.264214	0.549	0.412	2.26e-10
Gtf2h5	5.21e-19	-0.264848	0.841	0.751	1.07e-14
Ppia	1.24e-65	-0.265796	1	0.997	2.54e-61
Crip1	8.32e-12	-0.266157	0.652	0.522	1.71e-07
Rps27l	2.2e-26	-0.266676	0.962	0.916	4.53e-22
Srsf7	3.13e-15	-0.26675	0.571	0.427	6.45e-11
Cenpx	1.4e-13	-0.267042	0.5	0.365	2.88e-09
Oaz1	1.14e-37	-0.267441	0.984	0.96	2.35e-33
Hnrnpa2b1	1.42e-21	-0.267861	0.922	0.838	2.93e-17
Ostc	4.69e-22	-0.267872	0.896	0.836	9.64e-18
Taldo1	3.5e-12	-0.268268	0.565	0.447	7.2e-08
Dnajc9	2.25e-17	-0.268488	0.387	0.222	4.64e-13
Dad1	5.63e-21	-0.269402	0.926	0.878	1.16e-16
Selenoh	6.29e-14	-0.269575	0.801	0.737	1.3e-09
Tubb2a	2.94e-14	-0.269678	0.536	0.393	6.05e-10
Mcm6	1.63e-15	-0.270031	0.293	0.151	3.36e-11
Prdx6	2.13e-14	-0.270537	0.633	0.525	4.37e-10
Serp1	5.73e-13	-0.270729	0.588	0.452	1.18e-08
Psmb5	1.79e-19	-0.27085	0.847	0.786	3.69e-15
Pdlim7	2.9e-12	-0.270935	0.491	0.365	5.97e-08
Pdgfa	8.78e-16	-0.272407	0.266	0.127	1.81e-11
Rhoa	9.97e-22	-0.273411	0.906	0.855	2.05e-17
Gps1	2.43e-12	-0.275051	0.377	0.251	5.01e-08
Sec61b	5.72e-29	-0.275318	0.983	0.953	1.18e-24
Snrpb	8.46e-18	-0.275805	0.756	0.639	1.74e-13
Ddx39b	1.8e-15	-0.277192	0.741	0.647	3.69e-11
Nhp2	1.11e-12	-0.28027	0.413	0.283	2.27e-08
Krtcap2	3.29e-25	-0.281847	0.932	0.865	6.77e-21
5430416N02Rik	2.92e-13	-0.282183	0.49	0.353	6.01e-09
Elavl1	1.77e-16	-0.282788	0.636	0.507	3.65e-12
Sumo2	8.7e-46	-0.282949	0.986	0.972	1.79e-41
Atox1	7.91e-18	-0.284909	0.837	0.735	1.63e-13
Vcp	2.14e-15	-0.285207	0.608	0.47	4.4e-11
Lsm2	3.09e-14	-0.285218	0.63	0.509	6.36e-10
Ndufa11	3.71e-24	-0.285382	0.877	0.774	7.63e-20
Cox5a	2.24e-28	-0.28677	0.925	0.855	4.6e-24
Fdps	2.68e-08	-0.28775	0.509	0.41	0.000552151
Dut	2.04e-13	-0.287994	0.714	0.622	4.19e-09
Srsf3	9.64e-24	-0.29266	0.873	0.765	1.98e-19
Bola3	8.4e-21	-0.294987	0.639	0.465	1.73e-16
Magoh	4.33e-21	-0.295069	0.837	0.761	8.91e-17
Psmb2	4.96e-24	-0.296093	0.882	0.791	1.02e-19
Tuba1a	3.29e-14	-0.296308	0.737	0.631	6.77e-10
Arf5	1.17e-23	-0.296947	0.902	0.83	2.4e-19
Prmt1	4.22e-23	-0.297759	0.829	0.728	8.68e-19
Hmgb1	6.15e-31	-0.298356	0.993	0.964	1.27e-26
Eif5	1.39e-22	-0.301553	0.789	0.671	2.85e-18
Pbdc1	6.23e-16	-0.302962	0.428	0.283	1.28e-11
Sf3b5	4.21e-20	-0.303079	0.832	0.755	8.66e-16
Uba2	4.77e-16	-0.307753	0.52	0.372	9.82e-12
Mrpl20	6.3e-23	-0.308421	0.806	0.676	1.3e-18
Srm	2.44e-17	-0.309093	0.422	0.262	5.03e-13
Uqcrb	4.88e-43	-0.310719	0.984	0.951	1e-38
Actr3	3.65e-18	-0.310764	0.632	0.493	7.52e-14
Fbln5	2.81e-12	-0.310929	0.866	0.79	5.77e-08
Lsm4	5.97e-21	-0.312531	0.76	0.648	1.23e-16
Vdac3	5.42e-23	-0.312975	0.818	0.686	1.11e-18
Calr	3e-18	-0.31316	0.711	0.55	6.17e-14
mt-Nd3	2.57e-55	-0.316343	0.987	0.981	5.29e-51
S100a11	7.2e-24	-0.316961	0.945	0.878	1.48e-19
Guk1	3.32e-16	-0.317549	0.549	0.408	6.82e-12
Calm1	2.91e-35	-0.320377	0.974	0.902	5.98e-31
Gtf2a2	1.48e-21	-0.322312	0.746	0.629	3.05e-17
Dnajb11	1.02e-17	-0.322761	0.422	0.256	2.09e-13
Abracl	1.14e-24	-0.323851	0.85	0.745	2.35e-20
Tmem14c	1.64e-20	-0.323919	0.718	0.591	3.37e-16
Hspa8	1.25e-30	-0.328718	0.978	0.93	2.56e-26
Kdelr2	4.27e-22	-0.329715	0.834	0.734	8.78e-18
Lsm3	6.51e-18	-0.330914	0.604	0.454	1.34e-13
Rbpms	7e-18	-0.332858	0.731	0.608	1.44e-13
Tipin	1.04e-18	-0.333293	0.539	0.376	2.14e-14
Atpif1	1.73e-30	-0.334129	0.965	0.918	3.57e-26
Smdt1	7.82e-31	-0.335116	0.897	0.804	1.61e-26
Dynll1	3.66e-40	-0.339206	0.994	0.961	7.52e-36
Brix1	1.56e-21	-0.340636	0.561	0.386	3.2e-17
Myl6	2.46e-50	-0.341712	0.999	0.985	5.06e-46
Ppa1	2.23e-18	-0.343837	0.467	0.299	4.6e-14
Maged2	1.14e-18	-0.345887	0.572	0.412	2.35e-14
U2af1	2.59e-29	-0.345963	0.86	0.762	5.33e-25
Fkbp1a	4.67e-30	-0.348182	0.906	0.822	9.62e-26
Cdk1	1.57e-13	-0.348783	0.457	0.302	3.24e-09
Eif5a	5.72e-41	-0.348939	0.951	0.898	1.18e-36
Hmgb2	1.06e-15	-0.353147	0.821	0.729	2.19e-11
Cnn1	2.48e-08	-0.355224	0.301	0.194	0.000511288
Sf3b6	5.38e-35	-0.355605	0.837	0.721	1.11e-30
Tagln	4.17e-22	-0.357222	0.921	0.755	8.58e-18
Psmb3	3.7e-31	-0.357719	0.879	0.761	7.61e-27
Tyms	3.55e-16	-0.362069	0.435	0.287	7.31e-12
Actb	1.31e-24	-0.363478	0.999	0.995	2.69e-20
Tmed2	3.09e-34	-0.365458	0.897	0.798	6.36e-30
Ifrd1	7.14e-25	-0.366006	0.473	0.266	1.47e-20
Cirbp	4.91e-25	-0.367067	0.647	0.452	1.01e-20
Dtymk	3.02e-25	-0.369982	0.73	0.566	6.22e-21
Ppp1r14b	5.03e-27	-0.371787	0.789	0.649	1.04e-22
Klf2	2.57e-16	-0.372103	0.331	0.17	5.28e-12
Lsm6	8.53e-34	-0.373956	0.84	0.663	1.75e-29
Ndufa4	2.2e-67	-0.375083	0.991	0.975	4.52e-63
Snrpd1	1.94e-40	-0.375093	0.951	0.889	3.99e-36
Orc6	7.14e-26	-0.387515	0.614	0.414	1.47e-21
Hnrnpf	1.19e-35	-0.39098	0.848	0.737	2.45e-31
Gmnn	5.55e-19	-0.393609	0.462	0.288	1.14e-14
1810037I17Rik	5.67e-33	-0.39505	0.902	0.81	1.17e-28
Dbi	1.08e-44	-0.403859	0.912	0.803	2.23e-40
mt-Nd1	5.33e-96	-0.411646	0.996	0.992	1.1e-91
Myl9	4.96e-25	-0.412649	0.769	0.576	1.02e-20
H2afz	1.93e-32	-0.417507	0.99	0.985	3.96e-28
Atp5g1	3.76e-55	-0.421413	0.958	0.876	7.75e-51
Manf	3.34e-32	-0.422392	0.841	0.694	6.88e-28
Nme1	6.4e-35	-0.425525	0.812	0.685	1.32e-30
Rbm3	4.68e-49	-0.428117	0.91	0.796	9.62e-45
Tnni1	2.29e-14	-0.428184	0.556	0.418	4.71e-10
Tnnc1	8.53e-07	-0.434986	0.306	0.221	0.0175427
Uqcrq	3.11e-51	-0.436323	0.925	0.813	6.4e-47
Pdlim3	1.85e-18	-0.438096	0.764	0.633	3.81e-14
Ran	1.74e-55	-0.438986	0.965	0.903	3.58e-51
Hspa5	3.61e-30	-0.452408	0.793	0.663	7.43e-26
mt-Atp6	2.68e-137	-0.464543	0.999	0.994	5.51e-133
Srsf2	3.13e-39	-0.471129	0.704	0.485	6.44e-35
Gm10076	7.55e-72	-0.472738	0.942	0.879	1.55e-67
Pdia6	3.25e-41	-0.480049	0.854	0.688	6.68e-37
Id3	2.44e-35	-0.480821	0.965	0.881	5.02e-31
Alyref	2.01e-42	-0.480872	0.816	0.655	4.13e-38
Cycs	2.23e-55	-0.490079	0.935	0.799	4.59e-51
Prdx1	1.28e-96	-0.543718	0.987	0.933	2.63e-92
Ranbp1	2.82e-71	-0.556275	0.942	0.78	5.81e-67
Rrm2	1.66e-28	-0.559344	0.355	0.148	3.42e-24
mt-Cytb	4.56e-128	-0.567672	0.997	0.997	9.38e-124
Acta2	1.52e-38	-0.63146	0.831	0.609	3.14e-34
Tsix	1.38e-119	-0.634678	0.393	0.001	2.85e-115
Pclaf	2.98e-23	-0.721123	0.496	0.298	6.14e-19

## Sheet: VSMC II
gene	p_val	avg_logFC	pct.1	pct.2	p_val_adj
Malat1	9.67e-69	1.24111	0.737	0.925	1.99e-64
Igf2r	1.91e-30	1.19989	0.219	0.483	3.92e-26
Gm42418	1.25e-23	1.00772	0.077	0.307	2.58e-19
Col1a1	1.15e-22	0.8285	0.344	0.577	2.37e-18
mt-Co1	3.49e-57	0.79287	0.798	0.97	7.17e-53
Vcan	5.21e-15	0.785942	0.113	0.284	1.07e-10
Ankrd1	4.5e-09	0.734647	0.057	0.162	9.27e-05
Myh9	2.82e-11	0.734268	0.099	0.235	5.81e-07
Myl7	6.85e-11	0.73083	0.144	0.288	1.41e-06
Igfbp5	2.92e-12	0.709579	0.024	0.139	6.01e-08
Bnip3	1.02e-13	0.690818	0.091	0.252	2.11e-09
Meg3	1.47e-12	0.669184	0.148	0.308	3.01e-08
Myl3	1.6e-06	0.653276	0.146	0.247	0.0329292
mt-Nd5	1.12e-17	0.645947	0.346	0.543	2.3e-13
Stk38l	1.29e-07	0.641858	0.121	0.228	0.00264597
Actc1	9.26e-11	0.637341	0.308	0.468	1.91e-06
Mt1	5.62e-09	0.636497	0.034	0.13	0.000115666
Notch2	8.2e-08	0.630881	0.164	0.28	0.0016876
Pam	9.74e-11	0.63059	0.265	0.413	2e-06
Sox9	6.7e-07	0.624754	0.202	0.307	0.0137882
Myh7	1.96e-06	0.617544	0.034	0.105	0.0403599
mt-Nd2	2.79e-39	0.612637	0.767	0.932	5.74e-35
mt-Nd6	4.8e-09	0.600086	0.071	0.181	9.88e-05
Ldha	2.7e-26	0.576639	0.589	0.753	5.56e-22
Gm11808	2.37e-13	0.567862	0.362	0.513	4.88e-09
Kdm6b	1.61e-06	0.567734	0.099	0.19	0.0332283
Thbs1	1.34e-07	0.565524	0.061	0.154	0.00275857
Spry2	5.65e-09	0.565161	0.174	0.307	0.000116244
Fbn2	7.35e-07	0.560863	0.111	0.21	0.0151145
Slc38a2	3.72e-08	0.560734	0.233	0.349	0.00076485
Prrc2c	3.31e-07	0.553862	0.144	0.254	0.00681195
Nfib	5.97e-09	0.549085	0.192	0.325	0.000122837
Aldoa	2.17e-19	0.542874	0.561	0.705	4.46e-15
Peg3	7.84e-07	0.541218	0.263	0.37	0.0161226
Gpc3	6.11e-09	0.533463	0.457	0.566	0.000125737
Egr1	3.47e-10	0.515725	0.043	0.15	7.13e-06
Pgk1	4.09e-11	0.515425	0.405	0.533	8.42e-07
Hk2	1.7e-10	0.513616	0.067	0.189	3.49e-06
Myadm	8.64e-08	0.512132	0.206	0.327	0.00177745
Ktn1	1.45e-07	0.508323	0.14	0.251	0.00299296
Top2a	4.59e-07	0.502196	0.073	0.164	0.00943503
Nfia	3.09e-08	0.500846	0.277	0.405	0.00063507
Ncam1	1.2e-07	0.491064	0.134	0.247	0.00246644
Alkbh5	8.89e-07	0.48799	0.134	0.239	0.0183003
Fam162a	1.66e-09	0.468285	0.427	0.533	3.41e-05
Eef1a1	8.9e-43	0.449625	0.903	0.968	1.83e-38
Col3a1	1.24e-07	0.44897	0.374	0.495	0.0025608
Ctsl	3.09e-07	0.441823	0.425	0.516	0.00636056
Kdm5b	9.35e-07	0.437124	0.051	0.132	0.0192463
Sptbn1	5.42e-07	0.433228	0.083	0.177	0.0111489
Eno1	1.04e-07	0.430642	0.36	0.477	0.00213249
mt-Nd3	2.84e-18	0.417597	0.591	0.798	5.84e-14
Uba52	6.7e-26	0.416018	0.826	0.905	1.38e-21
mt-Co3	1.75e-26	0.414638	0.955	0.995	3.6e-22
Rpl13a	6.87e-07	0.41136	0.344	0.455	0.0141451
Nsa2	1.78e-07	0.410472	0.35	0.46	0.00366287
mt-Co2	4.42e-26	0.395332	0.937	0.989	9.1e-22
Vcl	4.04e-07	0.390089	0.049	0.133	0.00831854
mt-Nd4	4.77e-21	0.382716	0.798	0.93	9.81e-17
Lrrc58	1.57e-07	0.377523	0.043	0.129	0.00324025
mt-Nd4l	3.47e-07	0.373217	0.342	0.465	0.00713107
Mif	9.11e-19	0.350172	0.834	0.908	1.87e-14
mt-Nd1	3.31e-13	0.307227	0.798	0.908	6.8e-09
Gapdh	3.7e-14	0.304032	0.874	0.921	7.61e-10
Ndufc1	2.44e-07	-0.251279	0.725	0.575	0.00501894
Actg1	4.29e-13	-0.252347	0.96	0.927	8.84e-09
Gps1	1.48e-06	-0.253509	0.196	0.106	0.0303555
Btf3	1.56e-11	-0.256409	0.903	0.807	3.22e-07
Marcksl1	9.79e-07	-0.257576	0.482	0.348	0.0201409
Arf5	2.82e-07	-0.26247	0.559	0.429	0.00579568
Sarnp	1.28e-06	-0.263005	0.547	0.406	0.0264398
H2afv	1.62e-08	-0.264147	0.769	0.625	0.000334198
Cdc42	1.18e-08	-0.264871	0.646	0.498	0.000242288
Gng5	5.54e-20	-0.265918	0.962	0.92	1.14e-15
U2af1	1.14e-07	-0.266276	0.573	0.418	0.0023545
Sdhb	4.15e-08	-0.266811	0.492	0.336	0.000854126
Uqcrb	3.25e-09	-0.267349	0.798	0.663	6.69e-05
Hmgn1	1.32e-09	-0.267817	0.818	0.719	2.72e-05
Csrp2	1.48e-08	-0.269055	0.832	0.734	0.000305093
Hypk	4.84e-07	-0.269231	0.478	0.343	0.00995421
Atp5j	1.22e-09	-0.269355	0.773	0.639	2.51e-05
Srp9	2.18e-06	-0.269393	0.522	0.401	0.0448366
Ndufb4	9.96e-07	-0.269495	0.472	0.335	0.0204915
Sem1	4.09e-12	-0.270128	0.864	0.756	8.42e-08
Srm	8.29e-07	-0.271674	0.2	0.107	0.0170586
Sec61g	1.27e-16	-0.271722	0.931	0.884	2.61e-12
Ndufab1	6.69e-07	-0.272657	0.615	0.485	0.0137586
Tomm7	1.24e-07	-0.272682	0.664	0.524	0.00254375
Lgals1	2.73e-12	-0.274426	0.881	0.825	5.61e-08
Hmgb1	5.99e-12	-0.275165	0.866	0.785	1.23e-07
Mrps12	1.4e-06	-0.276495	0.237	0.138	0.0287642
Fkbp1a	1.76e-07	-0.277835	0.636	0.488	0.00362697
Psma7	6.85e-07	-0.28036	0.628	0.5	0.0140951
Mdk	3.77e-08	-0.280407	0.741	0.611	0.000775233
Cetn3	6.72e-08	-0.281811	0.494	0.346	0.00138245
Eif5a	1.99e-11	-0.28394	0.721	0.551	4.09e-07
S100a10	2.15e-07	-0.284009	0.573	0.43	0.0044252
Psma4	2.38e-08	-0.284556	0.472	0.321	0.000488802
Glipr2	2.03e-06	-0.285296	0.243	0.145	0.0418404
Rps17	1.77e-15	-0.286635	0.913	0.833	3.64e-11
Pdcd5	7.86e-09	-0.286642	0.67	0.521	0.000161647
Rpl22l1	5.03e-19	-0.289381	0.96	0.891	1.03e-14
Srsf3	1.12e-06	-0.289764	0.553	0.428	0.0231066
Vdac1	1.96e-06	-0.290371	0.54	0.403	0.0403323
Psma3	2.37e-09	-0.294095	0.619	0.45	4.88e-05
Atpif1	9.1e-11	-0.294227	0.812	0.679	1.87e-06
Tmsb4x	5.04e-21	-0.295531	1	0.999	1.04e-16
Strap	1.33e-06	-0.296871	0.277	0.173	0.0273086
Minos1	2.29e-06	-0.296971	0.567	0.441	0.0470541
Rbx1	4.72e-09	-0.297482	0.721	0.584	9.71e-05
Tbca	9.93e-10	-0.298547	0.741	0.625	2.04e-05
Eny2	7.65e-08	-0.299713	0.47	0.333	0.00157406
Zcrb1	1.52e-06	-0.300562	0.445	0.323	0.0313242
Ndufa11	5.72e-07	-0.300863	0.551	0.42	0.0117667
Atp5e	3.83e-14	-0.30281	0.877	0.754	7.88e-10
Mdh1	1.49e-07	-0.302859	0.51	0.368	0.00305866
Eloc	2.44e-07	-0.303979	0.597	0.459	0.00501761
Psmb1	1.32e-06	-0.304121	0.545	0.418	0.0272461
Atp5l	4.48e-12	-0.304289	0.832	0.659	9.22e-08
Id3	2.81e-08	-0.304506	0.773	0.664	0.000577392
H2afz	7.9e-12	-0.306497	0.951	0.917	1.63e-07
Ndufa13	7.85e-07	-0.307979	0.619	0.482	0.0161607
Bcl2l12	1.84e-08	-0.307995	0.136	0.052	0.000378405
Psmc4	2.29e-07	-0.309598	0.217	0.117	0.00471411
Snrpd2	8.16e-10	-0.310209	0.654	0.492	1.68e-05
Magoh	4.4e-09	-0.310871	0.534	0.375	9.05e-05
Nedd8	3.46e-09	-0.313444	0.65	0.506	7.13e-05
Ndufa5	1.72e-07	-0.314673	0.512	0.373	0.00353594
Brix1	2.18e-07	-0.315224	0.277	0.165	0.00447688
Mrpl20	7.08e-10	-0.316484	0.466	0.305	1.46e-05
Ppa1	9.82e-10	-0.317567	0.275	0.143	2.02e-05
Prmt1	4.84e-08	-0.318023	0.504	0.36	0.000995459
Abracl	1.93e-06	-0.319357	0.534	0.424	0.0396319
Prdx2	1.29e-13	-0.319522	0.832	0.726	2.65e-09
Cox5a	1.07e-10	-0.319997	0.68	0.525	2.19e-06
Lsm2	2.18e-06	-0.320143	0.372	0.253	0.0448256
Elob	4.19e-15	-0.320408	0.872	0.763	8.63e-11
Tmem167	7.52e-09	-0.320506	0.63	0.47	0.000154668
Dtymk	1.51e-08	-0.320572	0.421	0.275	0.000311105
Ptn	2.95e-09	-0.322536	0.721	0.548	6.08e-05
Sumo2	1.1e-13	-0.322784	0.852	0.737	2.27e-09
Bud31	3.05e-07	-0.322819	0.322	0.204	0.00627104
Cxcl12	1.37e-07	-0.323222	0.686	0.542	0.00281196
Ndufa12	4.79e-10	-0.323368	0.476	0.305	9.85e-06
Bex3	8.96e-08	-0.323667	0.757	0.651	0.00184308
Tmem160	2.75e-07	-0.324054	0.235	0.131	0.00565529
Glo1	2.09e-08	-0.325839	0.393	0.252	0.000429273
Hmgb3	7e-08	-0.328131	0.332	0.204	0.00144024
Ppia	1.61e-33	-0.328881	0.996	0.987	3.31e-29
Cox7b	1.6e-11	-0.329191	0.731	0.575	3.3e-07
Snrpd1	1.77e-12	-0.331586	0.737	0.552	3.64e-08
Etfb	1.57e-06	-0.334351	0.336	0.222	0.0323722
Phf5a	5.12e-08	-0.334361	0.35	0.224	0.00105423
Uqcc2	2.73e-10	-0.33471	0.557	0.39	5.62e-06
Ndufb2	3.6e-08	-0.340357	0.468	0.319	0.000741288
Selenoh	6.67e-09	-0.340601	0.595	0.446	0.000137218
Ran	3.21e-13	-0.340843	0.812	0.671	6.6e-09
Edf1	9.28e-10	-0.341218	0.532	0.367	1.91e-05
Taldo1	9.18e-10	-0.342937	0.362	0.216	1.89e-05
Manf	3.37e-07	-0.344158	0.512	0.387	0.00693651
Sf3b5	6.23e-09	-0.344792	0.514	0.361	0.000128153
Ndufs5	7.99e-10	-0.345315	0.54	0.383	1.64e-05
Rbm3	2.2e-11	-0.346505	0.623	0.446	4.53e-07
Arf4	3.37e-11	-0.349476	0.593	0.431	6.92e-07
Serf2	9.1e-32	-0.349613	0.988	0.94	1.87e-27
Tbcb	2.25e-09	-0.350389	0.415	0.268	4.64e-05
Atp5h	2.31e-12	-0.351388	0.757	0.591	4.76e-08
Mrto4	5.89e-07	-0.351458	0.253	0.15	0.0121299
Park7	1.13e-08	-0.351805	0.482	0.336	0.000232479
Siva1	5.52e-09	-0.35248	0.536	0.377	0.000113625
Psmb5	7.09e-11	-0.354225	0.551	0.374	1.46e-06
Atp5j2	6.83e-13	-0.354338	0.733	0.531	1.41e-08
Tubb2a	1.46e-06	-0.356255	0.245	0.147	0.029999
Dcun1d5	3.84e-07	-0.357285	0.324	0.208	0.0079078
Pomp	1.01e-09	-0.364708	0.476	0.32	2.08e-05
Cycs	9.28e-14	-0.367146	0.735	0.536	1.91e-09
1810037I17Rik	2.32e-11	-0.371635	0.605	0.42	4.77e-07
Tnni1	3.11e-07	-0.372124	0.304	0.184	0.0064063
Ubl5	1.7e-13	-0.37411	0.67	0.477	3.5e-09
Dynll1	4.56e-21	-0.375144	0.903	0.795	9.39e-17
Psmb6	2.99e-10	-0.380693	0.457	0.296	6.14e-06
Sec61b	3.75e-17	-0.380991	0.816	0.675	7.72e-13
Srsf2	1.83e-11	-0.387298	0.364	0.203	3.77e-07
Dad1	8.3e-11	-0.388892	0.611	0.446	1.71e-06
Ppp1r14b	4.31e-12	-0.389371	0.496	0.32	8.86e-08
Rbp1	6.23e-14	-0.389424	0.826	0.686	1.28e-09
Myl6	6.48e-24	-0.395851	0.931	0.822	1.33e-19
Ranbp1	1.46e-12	-0.39953	0.678	0.524	3e-08
Alyref	5.77e-12	-0.399568	0.54	0.365	1.19e-07
S100a11	2.3e-16	-0.406485	0.777	0.592	4.74e-12
Smarcb1	2.32e-06	-0.407521	0.178	0.096	0.0478245
Ube2s	4.31e-10	-0.4123	0.563	0.403	8.88e-06
Tmem14c	6.66e-10	-0.414343	0.427	0.28	1.37e-05
Lsm3	2.97e-08	-0.420356	0.342	0.213	0.000610838
Pclaf	8.75e-07	-0.422181	0.437	0.298	0.0179983
Uqcrq	2.11e-14	-0.428036	0.662	0.473	4.34e-10
Krtcap2	5.41e-14	-0.428663	0.698	0.525	1.11e-09
Cenpa	5.83e-07	-0.43175	0.336	0.216	0.012003
Sf3b6	8.1e-18	-0.44257	0.569	0.34	1.67e-13
Nme1	8.38e-13	-0.446838	0.559	0.376	1.72e-08
Atox1	8.26e-12	-0.450931	0.53	0.36	1.7e-07
Smdt1	1.48e-16	-0.453068	0.63	0.415	3.05e-12
Ndufa4	1.15e-26	-0.46504	0.891	0.761	2.36e-22
Gtf2h5	6.01e-14	-0.474317	0.536	0.347	1.24e-09
Prdx5	1.35e-12	-0.475723	0.334	0.174	2.77e-08
Rps27l	4.42e-18	-0.476392	0.747	0.555	9.11e-14
Lsm6	1.4e-13	-0.488777	0.54	0.36	2.89e-09
Psmb3	8.5e-15	-0.49581	0.599	0.411	1.75e-10
Prdx1	1.71e-28	-0.505646	0.84	0.657	3.52e-24
Gm10076	3.17e-21	-0.519342	0.702	0.508	6.52e-17
Atp5g1	7.78e-29	-0.547524	0.759	0.522	1.6e-24
Acta2	1.24e-20	-0.689814	0.69	0.472	2.56e-16
Xist	2.62e-52	-0.970824	0.231	0	5.39e-48
